# Supplementary material for: The influence of maternal factors on the neonatal microbiome and health
Source: Research Square preprint supplement (doi:10.21203/rs.3.rs-2485214/v1), 2023-02-02
Supplement: Supplementary file 2 [file 5247baef0719fbce5836d8e4.xlsx]

## Sheet: Annotation
Title	The association between maternal lipids and cytokines and the neonatal microbiome.
Sheet 1	p-value of the association between the Shannon index of the neonatal microbiomes and the concentration of lipids tested by the Pearson's correlation.
Sheet 2	p-value of the association between the Shannon index of the neonatal microbiomes and the concentration of cytokines tested by the Pearson's correlation.
Sheet 3	Mediation of maternal lipids on the association between maternal factors and the neonatal microbiome.
Term	Annotation			An example for the explanation of the mediation analysis
NB	The neonatal buccal microbiome
NR	The neonatal rectal microbiome			lhs	op	rhs	label	Estimate	standard error (S. E.)	pvalue
NS	The neonatal stool microbiome			C20 Cerx	~	smoker_yes	a	1.10029	0.122995	0
EPA	Eicosapentaenoic Acid			Shannon indexy	~	C20 Cer	b	-0.521986	0.157656	0.000929888
12-HETE	12-Hydroxyeicosatetraenoic acids			Shannon indexz	~	smoker_yes	cp	0.833133	0.241758	0.000568649
DHA	Docosahexaenoic acid			abv	:=	a*b	ab	-0.574333	0.199395	0.0039719
Cer	Ceramide			totalw	:=	cp+ab	total	0.2588	0.222384	0.244525
MonHex	Monohexylceramide
SM	Sphingomyelin
C1P	Ceramide-1-Phosphate			x. Every 1-unit increase in smoker_yes was associated with an a = 1.1 (S.E. = 0.12) increase in Log10(C20 Cer concentration). The pvalue of the association was 0.
Sa	Sphinganine			y. Every 1-unit increase in Log10(C20 Cer concentration) was associated with b = -0.52 (S.E. = 0.16) increase or 0.52 decrease in Shannon index. The pvalue of the association was 0.00093.
So	Sphingosine			z. Every 1-unit increase in smoker_yes was associated with cp = 0.83 (S.E. = 0.24) increase in Shannon index. The pvalue of the association was 0.00057.
DH	Dihydro			v. Every 1-unit increase in smoker_yes was associated with cp = -0.57 (S.E. = 0.20) increase or 0.57 decrease in Shannon index mediated by C20 Cer. The pvalue of the association was 0.0040.
RANTES	Regulated upon Activation, Normal T Cell Expressed and Presumably Secreted			w. The direct impact of smoker_yes on Shannon index is cp = 0.83 and the indirect impact mediated by C20 Cer is a*b = -0.57. Thus, a total impact of smoker_yes on Shannon index is cp + a*b = 0.26 (S.E = 0.22) and the pvalue of the total impact is 0.24.
IL	Interleukin
MIP	Macrophage Inflammatory Protein
TNF	Tumor necrosis factor
IP	Interferon gamma inducible protein

## Sheet: Sheet 1
The neonatal microbiome	Lipid		Case number	P-value	R-value	Slope (a slope higher than zero indicates a positive correlation)	Statistical power
NR	C26 SM	NRC26 SM	54	0.00046	0.27256	0.39651	1
NR	C24 Cer	NRC24 Cer	54	0.00113	0.84955	-0.51268	1
NR	C24 SM	NRC24 SM	54	0.00304	0.15672	0.33284	1
NR	C18:0 Cer	NRC18:0 Cer	54	0.00419	0.31679	-0.47765	1
NR	C22 SM	NRC22 SM	54	0.00502	0.14171	0.3119	1
NR	C26:1 Cer	NRC26:1 Cer	54	0.00603	0.54617	-0.7129	1
NR	C24:1 SM	NRC24:1 SM	54	0.00726	0.1306	0.28847	1
NR	C16 DH SM	NRC16 DH SM	54	0.01009	0.12059	0.30441	1
NR	C26:1 MonHex	NRC26:1 MonHex	54	0.01017	0.5383	-1.0593	1
NR	C18:1 SM	NRC18:1 SM	54	0.01148	0.11667	0.25314	1
NR	C26 MonHex	NRC26 MonHex	54	0.01206	0.18127	0.3991	1
NR	C20 SM	NRC20 SM	54	0.01224	0.11471	0.24447	1
NR	C18:0 SM	NRC18:0 SM	54	0.01455	0.10944	0.23944	1
NR	C14 Cer	NRC14 Cer	54	0.01667	0.2437	-0.41094	1
NR	C26:1 SM	NRC26:1 SM	54	0.01822	0.12026	0.26835	1
NB	C20 Cer	NBC20 Cer	74	0.02084	0.14731	-0.33048	1
NR	C14 monHex	NRC14 monHex	54	0.02756	0.30165	-0.29944	1
NR	C16 SM	NRC16 SM	54	0.02804	0.08943	0.23862	1
NR	C24:1 Cer	NRC24:1 Cer	54	0.03018	0.33477	-0.53662	1
NS	C24:1 SM	NSC24:1 SM	31	0.03289	0.14755	0.37332	1
NR	C22 Cer	NRC22 Cer	54	0.03887	0.36084	-0.39842	1
NR	12-HETE	NR12-HETE	54	0.04162	0.11333	-0.66214	1
NR	8isoprostane	NR8isoprostane	54	0.04358	0.11775	0.24737	1
NB	C18:0 Cer	NBC18:0 Cer	74	0.04364	0.14747	-0.40105	1
NS	C16 MonHex	NSC16 MonHex	31	0.0457	0.34226	-0.30814	1
NR	C14 SM	NRC14 SM	54	0.04798	0.07312	0.27613	1
NB	C22 SM	NBC22 SM	74	0.05047	0.0521	0.20314	1
NB	C20 SM	NBC20 SM	74	0.05481	0.05027	0.19411	1
NS	C20 SM	NSC20 SM	31	0.07234	0.10709	0.28845	1
NS	C18:0 Cer	NSC18:0 Cer	31	0.07657	0.30766	-0.57162	0.999965
NB	C24:1 SM	NBC24:1 SM	74	0.08167	0.04151	0.18202	1
NR	C18:1 Cer	NRC18:1 Cer	54	0.09227	0.12345	-0.25658	1
NB	C16 DH Cer	NBC16 DH Cer	74	0.09258	0.08856	-0.23084	1
NR	C20 Cer	NRC20 Cer	54	0.0927	0.12314	-0.26109	1
NB	C18:0 SM	NBC18:0 SM	74	0.09298	0.0387	0.17166	1
NB	C16 DH SM	NBC16 DH SM	74	0.10585	0.03591	0.17146	1
NB	C14 SM	NBC14 SM	74	0.11149	0.03481	0.1759	1
NS	d18:1 So1P	NSd18:1 So1P	31	0.11422	0.25367	0.29766	0.999122
NB	C18:1 MonHex	NBC18:1 MonHex	74	0.11508	0.12552	-0.41386	1
NB	EPA	NBEPA	74	0.123	0.05443	-0.34169	1
NB	C18:1 SM	NBC18:1 SM	74	0.13707	0.03044	0.16026	1
NR	EPA	NREPA	54	0.1379	0.06961	0.24769	1
NB	C14 monHex	NBC14 monHex	74	0.1386	0.09285	-0.25188	1
NS	C26:1 SM	NSC26:1 SM	31	0.14519	0.08631	0.27049	1
NS	DHA	NSDHA	31	0.14917	0.11203	0.3805	0.999995
NR	d18:0 Sa	NRd18:0 Sa	54	0.15002	0.19556	0.58206	0.997717
NR	C16 DH Cer	NRC16 DH Cer	54	0.15012	0.08433	-0.23677	1
NR	d18:1 So1P	NRd18:1 So1P	54	0.15538	0.08228	-0.23679	1
NB	C26:1 MonHex	NBC26:1 MonHex	74	0.16537	0.13271	0.54965	0.999592
NS	PGE2	NSPGE2	31	0.17158	0.10124	0.25415	0.999975
NS	C18:1 SM	NSC18:1 SM	31	0.17968	0.0612	0.27018	1
NR	PGD2	NRPGD2	54	0.18061	0.05209	0.10263	1
NS	TXB2	NSTXB2	31	0.18141	0.09697	0.18147	0.999964
NR	C18:0 MonHex	NRC18:0 MonHex	54	0.20717	0.08237	-0.26101	0.99994
NS	C24 SM	NSC24 SM	31	0.20782	0.05413	0.23959	1
NB	C24:1 Cer	NBC24:1 Cer	74	0.21244	0.11682	-0.24473	0.998145
NB	C16 SM	NBC16 SM	74	0.2127	0.02148	0.13139	1
NS	C26 MonHex	NSC26 MonHex	31	0.21656	0.09987	0.32716	0.999093
NR	C24 MonHex	NRC24 MonHex	54	0.25123	0.07664	-0.35443	0.997373
NS	d18:0 Sa1P	NSd18:0 Sa1P	31	0.26002	0.12478	0.29918	0.967121
NS	C22 SM	NSC22 SM	31	0.26132	0.0433	0.21729	0.99999
NS	C16 DH SM	NSC16 DH SM	31	0.29421	0.03786	0.19999	0.999959
NB	6ketoPGF1alpha	NB6ketoPGF1alpha	74	0.29947	0.02444	0.16388	0.999997
NS	C16 Cer	NSC16 Cer	31	0.31324	0.04065	-0.21892	0.998516
NB	C24 SM	NBC24 SM	74	0.33622	0.01285	0.10016	1
NB	C26:1 SM	NBC26:1 SM	74	0.34896	0.01463	0.09983	1
NB	C26:1 Cer	NBC26:1 Cer	74	0.35474	0.1435	0.44796	0.615282
NR	TXB2	NRTXB2	54	0.35594	0.02439	0.06419	0.999923
NR	C18:1 MonHex	NRC18:1 MonHex	54	0.35637	0.05693	-0.1904	0.965834
NR	C22 MonHex	NRC22 MonHex	54	0.36838	0.06262	-0.23233	0.933001
NB	d18:1 So1P	NBd18:1 So1P	74	0.37447	0.03167	0.37658	0.995423
NS	C16 DH MonHex	NSC16 DH MonHex	31	0.37655	0.0314	-0.12878	0.995487
NR	PGJ2	NRPGJ2	54	0.39278	0.02366	0.26126	0.99722
NS	PGF2alpha	NSPGF2alpha	31	0.41197	0.03995	-0.30566	0.910485
NS	C22 MonHex	NSC22 MonHex	31	0.4128	0.09771	-0.14952	0.550597
NR	DHA	NRDHA	54	0.41349	0.01919	0.09141	0.999376
NS	C18:0 MonHex	NSC18:0 MonHex	31	0.41867	0.05523	-0.26087	0.80963
NR	PGE2	NRPGE2	54	0.4188	0.01877	0.07727	0.999097
NS	PGD2	NSPGD2	31	0.43639	0.03603	-0.47845	0.919284
NR	C20 MonHex	NRC20 MonHex	54	0.44196	0.02985	-0.15961	0.946823
NS	C18:0 SM	NSC18:0 SM	31	0.4431	0.02042	0.13798	0.989077
NB	PGJ2	NBPGJ2	74	0.44678	0.01353	-0.20227	0.997903
NS	C16 SM	NSC16 SM	31	0.44776	0.02002	0.14365	0.987365
NB	C24:1 MonHex	NBC24:1 MonHex	74	0.45458	0.02454	-0.13598	0.958492
NB	C18:1 Cer	NBC18:1 Cer	74	0.46289	0.0181	-0.12601	0.993214
NR	C16 Cer	NRC16 Cer	54	0.4657	0.01244	0.114	0.99882
NR	6ketoPGF1alpha	NR6ketoPGF1alpha	54	0.46898	0.01651	-0.17988	0.99336
NS	C20 MonHex	NSC20 MonHex	31	0.4759	0.05793	-0.197	0.558446
NB	d18:0 Sa1P	NBd18:0 Sa1P	74	0.48298	0.02072	0.27869	0.931028
NR	C16 DH MonHex	NRC16 DH MonHex	54	0.48954	0.01022	0.07982	0.997482
NS	EPA	NSEPA	31	0.50105	0.02705	-0.27648	0.736886
NB	TXB2	NBTXB2	74	0.5632	0.00748	0.05541	0.98742
NB	12-HETE	NB12-HETE	74	0.57183	0.00716	0.1352	0.949173
NB	8isoprostane	NB8isoprostane	74	0.57571	0.00717	0.07983	0.974939
NB	PGF2alpha	NBPGF2alpha	74	0.58041	0.00716	-0.11848	0.971726
NB	C24 MonHex	NBC24 MonHex	74	0.58724	0.02328	-0.19351	0.539298
NB	d18:0 Sa	NBd18:0 Sa	74	0.58815	0.01873	-0.20525	0.563798
NS	C20 Cer	NSC20 Cer	31	0.58829	0.01999	-0.10799	0.58433
NB	DHA	NBDHA	74	0.63042	0.00519	-0.07507	0.856206
NB	d18:1 So	NBd18:1 So	74	0.63549	0.03986	-0.28332	0.250416
NS	8isoprostane	NS8isoprostane	31	0.63968	0.01319	0.12883	0.517933
NB	C22 Cer	NBC22 Cer	74	0.66171	0.01805	0.13033	0.253584
NS	PGJ2	NSPGJ2	31	0.66977	0.01096	0.18454	0.514957
NS	12-HETE	NS12-HETE	31	0.68193	0.00955	0.14985	0.367865
NB	C26 SM	NBC26 SM	74	0.68215	0.00302	0.04585	0.835072
NB	C14 Cer	NBC14 Cer	74	0.69384	0.00583	-0.07792	0.598312
NB	C26 MonHex	NBC26 MonHex	74	0.70709	0.00348	-0.06337	0.759565
NS	C18:1 Cer	NSC18:1 Cer	31	0.71623	0.01141	-0.07849	0.27149
NS	C24:1 MonHex	NSC24:1 MonHex	31	0.72866	0.01403	0.11178	0.170738
NB	PGD2	NBPGD2	74	0.73927	0.00249	-0.0324	0.541423
NB	C16 MonHex	NBC16 MonHex	74	0.74732	0.00481	-0.04904	0.420313
NB	C16 Cer	NBC16 Cer	74	0.75031	0.00165	0.04092	0.530969
NR	d18:0 Sa1P	NRd18:0 Sa1P	54	0.76297	0.00422	-0.07266	0.314585
NS	C14 monHex	NSC14 monHex	31	0.78034	0.00909	-0.05159	0.119256
NS	C26 SM	NSC26 SM	31	0.78899	0.00318	0.06277	0.297748
NB	C16 DH MonHex	NBC16 DH MonHex	74	0.82955	0.00071	0.02096	0.272093
NS	C16 DH Cer	NSC16 DH Cer	31	0.84006	0.00353	-0.0393	0.124921
NB	C18:0 MonHex	NBC18:0 MonHex	74	0.84669	0.00174	-0.04699	0.148836
NR	C16 MonHex	NRC16 MonHex	54	0.85632	0.00177	-0.03113	0.140902
NB	C20 MonHex	NBC20 MonHex	74	0.86183	0.00119	-0.03493	0.157403
NB	C22 MonHex	NBC22 MonHex	74	0.88096	0.00115	0.02634	0.106608
NS	C14 SM	NSC14 SM	31	0.92116	0.00034	0.01842	0.127703
NR	C24:1 MonHex	NRC24:1 MonHex	54	0.9313	0.00035	-0.01811	0.075131
NS	6ketoPGF1alpha	NS6ketoPGF1alpha	31	0.93614	0.00039	0.02363	0.0654866
NB	PGE2	NBPGE2	74	0.95974	6e-05	-0.00685	0.0512396
NR	PGF2alpha	NRPGF2alpha	54	0.96314	7e-05	-0.01144	0.0557086
NS	C14 Cer	NSC14 Cer	31	0.97135	0.00011	-0.00771	0.0515771
NB	C24 Cer	NBC24 Cer	74	NA	NA	NA	NA
NB	C26 Cer	NBC26 Cer	74	NA	NA	NA	NA
NB	C14 C1P	NBC14 C1P	74	NA	NA	NA	NA
NB	C16 C1P	NBC16 C1P	74	NA	NA	NA	NA
NB	C16 DH C1P	NBC16 DH C1P	74	NA	NA	NA	NA
NB	C18:1 C1P	NBC18:1 C1P	74	NA	NA	NA	NA
NB	C18:0 C1P	NBC18:0 C1P	74	NA	NA	NA	NA
NB	C20 C1P	NBC20 C1P	74	NA	NA	NA	NA
NB	C22 C1P	NBC22 C1P	74	NA	NA	NA	NA
NB	C24:1C1P	NBC24:1C1P	74	NA	NA	NA	NA
NB	C24 C1P	NBC24 C1P	74	NA	NA	NA	NA
NB	C26:1 C1P	NBC26:1 C1P	74	NA	NA	NA	NA
NB	C26 C1P	NBC26 C1P	74	NA	NA	NA	NA
NR	d18:1 So	NRd18:1 So	54	NA	NA	NA	NA
NR	C26 Cer	NRC26 Cer	54	NA	NA	NA	NA
NR	C14 C1P	NRC14 C1P	54	NA	NA	NA	NA
NR	C16 C1P	NRC16 C1P	54	NA	NA	NA	NA
NR	C16 DH C1P	NRC16 DH C1P	54	NA	NA	NA	NA
NR	C18:1 C1P	NRC18:1 C1P	54	NA	NA	NA	NA
NR	C18:0 C1P	NRC18:0 C1P	54	NA	NA	NA	NA
NR	C20 C1P	NRC20 C1P	54	NA	NA	NA	NA
NR	C22 C1P	NRC22 C1P	54	NA	NA	NA	NA
NR	C24:1C1P	NRC24:1C1P	54	NA	NA	NA	NA
NR	C24 C1P	NRC24 C1P	54	NA	NA	NA	NA
NR	C26:1 C1P	NRC26:1 C1P	54	NA	NA	NA	NA
NR	C26 C1P	NRC26 C1P	54	NA	NA	NA	NA
NS	d18:1 So	NSd18:1 So	31	NA	NA	NA	NA
NS	d18:0 Sa	NSd18:0 Sa	31	NA	NA	NA	NA
NS	C22 Cer	NSC22 Cer	31	NA	NA	NA	NA
NS	C24:1 Cer	NSC24:1 Cer	31	NA	NA	NA	NA
NS	C24 Cer	NSC24 Cer	31	NA	NA	NA	NA
NS	C26:1 Cer	NSC26:1 Cer	31	NA	NA	NA	NA
NS	C26 Cer	NSC26 Cer	31	NA	NA	NA	NA
NS	C18:1 MonHex	NSC18:1 MonHex	31	NA	NA	NA	NA
NS	C24 MonHex	NSC24 MonHex	31	NA	NA	NA	NA
NS	C26:1 MonHex	NSC26:1 MonHex	31	NA	NA	NA	NA
NS	C14 C1P	NSC14 C1P	31	NA	NA	NA	NA
NS	C16 C1P	NSC16 C1P	31	NA	NA	NA	NA
NS	C16 DH C1P	NSC16 DH C1P	31	NA	NA	NA	NA
NS	C18:1 C1P	NSC18:1 C1P	31	NA	NA	NA	NA
NS	C18:0 C1P	NSC18:0 C1P	31	NA	NA	NA	NA
NS	C20 C1P	NSC20 C1P	31	NA	NA	NA	NA
NS	C22 C1P	NSC22 C1P	31	NA	NA	NA	NA
NS	C24:1C1P	NSC24:1C1P	31	NA	NA	NA	NA
NS	C24 C1P	NSC24 C1P	31	NA	NA	NA	NA
NS	C26:1 C1P	NSC26:1 C1P	31	NA	NA	NA	NA
NS	C26 C1P	NSC26 C1P	31	NA	NA	NA	NA

## Sheet: Sheet 2
The neonatal microbiome	Cytokine	Case number	P-value	R-value	Slope (a slope higher than zero indicates a positive correlation)	Statistical power
NS	RANTES	52	0.01244	0.11854	-0.27896	1
NS	Eotaxin	52	0.0162	0.1102	-0.42596	1
NS	MIP-1b	52	0.02662	0.09451	-0.21765	1
NS	IP-10	52	0.03418	0.08663	-0.26183	1
NS	TNF-a	52	0.10383	0.05204	-0.21013	1
NS	IL-17A	52	0.15841	0.03939	-0.21196	1
NR	IL-1b	74	0.20081	0.02263	0.15647	1
NS	IL-8	52	0.20113	0.03247	-0.18238	1
NB	IL-17A	96	0.21373	0.0164	0.13904	1
NS	IL-6	52	0.21785	0.03021	-0.16217	1
NB	MIP-1b	96	0.24302	0.01447	0.08565	1
NB	IP-10	96	0.27744	0.01254	0.0981	1
NB	RANTES	96	0.29351	0.01173	0.09207	1
NB	IL-6	96	0.30127	0.01136	-0.10772	1
NB	TNF-a	96	0.30482	0.0112	0.10945	1
NR	RANTES	74	0.34605	0.01234	-0.09433	1
NB	IL-8	96	0.39057	0.00785	0.08909	1
NR	IL-6	74	0.40384	0.0097	0.10388	1
NR	Eotaxin	74	0.47583	0.00709	-0.11	0.999948
NB	IL-1b	96	0.4938	0.005	0.07852	1
NR	TNF-a	74	0.63389	0.00317	-0.05726	0.974698
NR	IL-8	74	0.67943	0.00239	0.04801	0.901161
NS	IL-1b	52	0.74126	0.0022	0.05278	0.646359
NB	Eotaxin	96	0.7865	0.00078	-0.03968	0.781798
NR	MIP-1b	74	0.84471	0.00054	0.01596	0.391205
NR	IP-10	74	0.92722	0.00012	0.00986	0.114866
NR	IL-17A	74	0.94054	8e-05	-0.00857	0.0970938

## Sheet: Sheet 3
	lhs	op	rhs	label	Estimate	standard error (S. E.)	z	pvalue	ci.lower	ci.upper	std.lv	std.all	std.nox		Total case number (smoker_yes number)
1	C20 Cer	~	smoker_yes	a	1.10029	0.122995	8.94579	0	0.8687	1.34188	1.10029	0.543388	1.66493		33 (4)
2	Shannon index	~	C20 Cer	b	-0.521986	0.157656	-3.31092	0.000929888	-0.782257	-0.186153	-0.521986	-0.576942	-0.576942
3	Shannon index	~	smoker_yes	cp	0.833133	0.241758	3.44614	0.000568649	0.342573	1.30771	0.833133	0.454771	1.39341
4	C20 Cer	~~	C20 Cer		0.307782	0.0615541	5.00018	5.72769e-07	0.201587	0.445457	0.307782	0.704729	0.704729
5	Shannon index	~~	Shannon index		0.266502	0.0564665	4.71965	2.36246e-06	0.182796	0.429426	0.266502	0.745466	0.745466
6	smoker_yes	~~	smoker_yes		0.10652	0	NA	NA	0.10652	0.10652	0.10652	1	0.10652
7	ab	:=	a*b	ab	-0.574333	0.199395	-2.88038	0.0039719	-0.989606	-0.202341	-0.574333	-0.313503	-0.960566
8	total	:=	cp+ab	total	0.2588	0.222384	1.16375	0.244525	-0.164855	0.738898	0.2588	0.141267	0.432839
	lhs	op	rhs	label	Estimate	standard error (S. E.)	z	pvalue	ci.lower	ci.upper	std.lv	std.all	std.nox		Total case number (anxiety number)
1	C20 Cer	~	anxiety	a	0.914389	0.234655	3.89674	9.74976e-05	0.328586	1.26831	0.914389	0.497186	1.3042		34 (6)
2	Shannon index	~	C20 Cer	b	-0.526489	0.127275	-4.13664	3.52432e-05	-0.739174	-0.2288	-0.526489	-0.609778	-0.609778
3	Shannon index	~	anxiety	cp	0.696513	0.213517	3.2621	0.0011059	0.331111	1.17859	0.696513	0.438631	1.1506
4	C20 Cer	~~	C20 Cer		0.370048	0.0597731	6.19089	5.98253e-10	0.275804	0.538128	0.370048	0.752806	0.752806
5	Shannon index	~~	Shannon index		0.257149	0.0548365	4.68937	2.74051e-06	0.169756	0.391385	0.257149	0.701736	0.701736
6	anxiety	~~	anxiety		0.145329	0	NA	NA	0.145329	0.145329	0.145329	1	0.145329
7	ab	:=	a*b	ab	-0.481415	0.18833	-2.55624	0.010581	-0.883719	-0.166721	-0.481415	-0.303173	-0.79527
8	total	:=	cp+ab	total	0.215097	0.203213	1.05848	0.289836	-0.177431	0.653535	0.215097	0.135458	0.355328
	lhs	op	rhs	label	Estimate	standard error (S. E.)	z	pvalue	ci.lower	ci.upper	std.lv	std.all	std.nox		Total case number (abnormal_stress number)
1	C20 Cer	~	abnormal_stress	a	0.941638	0.254412	3.70123	0.000214559	0.31026	1.31661	0.941638	0.380942	1.34306		34 (3)
2	Shannon index	~	C20 Cer	b	-0.432767	0.153235	-2.8242	0.00473986	-0.720024	-0.11333	-0.432767	-0.50123	-0.50123
3	Shannon index	~	abnormal_stress	cp	0.613663	0.262541	2.3374	0.0194184	0.0580364	1.09013	0.613663	0.287533	1.01374
4	C20 Cer	~~	C20 Cer		0.420225	0.0678889	6.18989	6.02046e-10	0.311101	0.568997	0.420225	0.854883	0.854883
5	Shannon index	~~	Shannon index		0.284324	0.0577209	4.92585	8.39932e-07	0.197064	0.414984	0.284324	0.775896	0.775896
6	abnormal_stress	~~	abnormal_stress		0.0804498	0	NA	NA	0.0804498	0.0804498	0.0804498	1	0.0804498
7	ab	:=	a*b	ab	-0.40751	0.192139	-2.12091	0.0339293	-0.841551	-0.0862603	-0.40751	-0.190939	-0.673183
8	total	:=	cp+ab	total	0.206153	0.309496	0.666092	0.505352	-0.248289	0.930911	0.206153	0.0965932	0.340552
	lhs	op	rhs	label	Estimate	standard error (S. E.)	z	pvalue	ci.lower	ci.upper	std.lv	std.all	std.nox		Total case number (hpv_history number)
1	C14 SM	~	hpv_history	a	0.549074	0.187069	2.93513	0.00333403	0.152707	0.868043	0.549074	0.335699	0.926236		45 (7)
2	Shannon index	~	C14 SM	b	0.497466	0.146268	3.40107	0.000671226	0.292797	0.874777	0.497466	0.488026	0.488026
3	Shannon index	~	hpv_history	cp	-0.716149	0.218171	-3.28251	0.00102886	-1.05912	-0.167338	-0.716149	-0.429538	-1.18515
4	C14 SM	~~	C14 SM		0.311811	0.0934898	3.33524	0.000852247	0.170308	0.546701	0.311811	0.887306	0.887306
5	Shannon index	~~	Shannon index		0.262196	0.0476719	5.50001	3.79777e-08	0.188498	0.407226	0.262196	0.71807	0.71807
6	hpv_history	~~	hpv_history		0.131358	0	NA	NA	0.131358	0.131358	0.131358	1	0.131358
7	ab	:=	a*b	ab	0.273146	0.118742	2.30034	0.0214292	0.0924049	0.586146	0.273146	0.16383	0.452027
8	total	:=	cp+ab	total	-0.443003	0.259369	-1.708	0.087636	-0.883221	0.148309	-0.443003	-0.265709	-0.733124
	lhs	op	rhs	label	Estimate	standard error (S. E.)	z	pvalue	ci.lower	ci.upper	std.lv	std.all	std.nox		Total case number (doctor_yeast_meds number)
1	C18:0 Cer	~	doctor_yeast_meds	a	-1.03045	0.126105	-8.17138	2.22045e-16	-1.30448	-0.758373	-1.03045	-0.505643	-1.72255		27 (3)
2	Shannon index	~	C18:0 Cer	b	-0.672489	0.156623	-4.29367	1.75742e-05	-0.962306	-0.350505	-0.672489	-0.779075	-0.779075
3	Shannon index	~	doctor_yeast_meds	cp	-0.850051	0.26938	-3.15558	0.00160177	-1.41029	-0.349202	-0.850051	-0.48323	-1.6462
4	C18:0 Cer	~~	C18:0 Cer		0.266365	0.0818066	3.25603	0.00112982	0.142442	0.471003	0.266365	0.744325	0.744325
5	Shannon index	~~	Shannon index		0.144053	0.0419257	3.43592	0.000590542	0.08308	0.256954	0.144053	0.540252	0.540252
6	doctor_yeast_meds	~~	doctor_yeast_meds		0.0861678	0	NA	NA	0.0861678	0.0861678	0.0861678	1	0.0861678
7	ab	:=	a*b	ab	0.692969	0.185651	3.73263	0.000189488	0.348337	1.07317	0.692969	0.393934	1.34199
8	total	:=	cp+ab	total	-0.157082	0.21099	-0.744499	0.456575	-0.581346	0.207221	-0.157082	-0.0892967	-0.304202
