# Supplementary material for: The influence of maternal factors on the neonatal microbiome and health
Source: Research Square preprint supplement (doi:10.21203/rs.3.rs-2485214/v1), 2023-02-02
Supplement: Supplementary file 3 [file 683f72d4bda5a580b5536977.xlsx]

## Sheet: Annotation
Title	The relative abundance of taxa in the six studied microbiomes

## Sheet: Sheet 1
Taxa	NB Day 0	NB Day 1	NB Day 2	NR Day 0	NR Day 1	NR Day 2	NS Day 1	NS Day 2	MB	MV	MR
Corynebacterium_OTU_226	0.145908	0.318455	0.377166	0.137948	0.0150159	0.013991	0.000335883	0.000430725	0.262792	0.00478302	0.00137275
Lactobacillus_iners	0.0180714	0.00318998	0.0011914	0.0886661	0.0336113	0.0244807	0.015558	0.000337272	0.0211943	0.380128	0.053428
Streptococcus_mitis	0.108986	0.253141	0.119661	0.0731106	0.027579	0.0606911	0.000117332	4.07013e-05	0.128407	0.000863882	0.000243373
Escherichia_coli	0.0457292	0.00882319	0.00779891	0.0663942	0.439475	0.320109	0.284901	0.41062	0.00475446	0.00184845	0.00273829
Lactobacillus_crispatus	0.0496131	0.000253886	0.00127984	0.0632517	0.00397979	0.039214	0.00407169	0.00819628	0.0277298	0.187778	0.0349862
Streptophyta_OTU_179	0.0459147	0.0791036	0.0733144	0.0603104	0.0162769	0.0188758	0.0224808	0.0355219	0.044534	0.000643606	0.0017358
BVAB1	0.00247283	0.000296127	0.0200411	0.0542064	0.00572129	0.000446012	0.000485772	5.00431e-05	0.00448372	0.0893161	0.0143346
Streptococcus_pneumoniae	0.0546344	0.0511339	0.0506559	0.0459239	0.016779	0.00206841	4.92887e-05	2.05509e-05	0.0919023	0.00169206	0.000197721
Corynebacterium_tuberculostearicum	0.00399489	0.000107148	0.000962461	0.031598	0.0126359	0.0831098	0.000391691	0.00301449	0.000627321	0.00323565	0.0166392
Bacteroides_fragilis	0.00590295	1.06821e-06	5.52572e-07	0.0277137	0.00612683	0.0148242	0.000614629	0.000851913	0.000433265	5.1013e-06	0.00183245
Gardnerella_vaginalis	0.00894905	0.00419088	0.000497556	0.0257678	0.00416643	0.00581919	0.00864796	3.2497e-05	0.00316336	0.0661345	0.0196685
Cardiobacterium_OTU_5_BT	0.00414756	6.36947e-06	1.92839e-06	0.0247925	0.00231606	0.021053	0.000287003	0.000397826	0.000129706	6.67431e-06	0.00173754
Christensenellaceae_OTU_260	0.0142342	7.34106e-07	3.52448e-05	0.0235395	0.027915	0.0186079	0.00118043	0.0206	1.71018e-05	5.20301e-05	0.000362904
Megasphaera_sp._HMT_841	0.00255744	0.000800801	3.24981e-05	0.0227283	0.00111596	6.72772e-05	0.000519404	0.000642182	0.00141696	0.0163104	0.00420843
Streptococcus_parasanguinis	0.0223513	0.017173	0.0187057	0.0226958	0.00201265	0.00463826	0.00105011	0.00531562	0.00834814	0.000368814	0.000209367
Prevotella_OTU_515	0.00114321	5.69125e-06	1.25094e-06	0.0213043	0.00230172	1.70225e-05	5.35908e-05	0	0.000182642	0.00261939	0.00197967
Gemella_haemolysans	0.0140337	0.0526563	0.0905845	0.0191805	0.0228282	0.000194497	6.15606e-05	6.31964e-05	0.045241	0.00280495	8.23104e-05
Atopobium_vaginae	0.0127261	0.00229963	8.73206e-05	0.0175477	0.00574211	0.000293872	0.00171604	4.77837e-05	0.00279788	0.0215631	0.00793669
Prevotella_OTU_806	0.000449184	0.000311621	3.18555e-06	0.0145882	0.000479064	0	4.91831e-05	0	0.00097054	0.0064271	0.00199175
Enterobacteriaceae_OTU_11	0.000708716	6.34596e-05	2.96639e-05	0.0130812	0.0113614	0.00985477	0.0113579	0.0137422	0.000109259	0.000122476	2.13942e-05
Sneathia_amnii	0.00227541	3.1789e-05	0.000350021	0.00894813	0.00129904	2.3573e-05	0.00146399	1.06109e-05	0.000405628	0.00841977	0.00437824
Porphyromonas_OTU_94_BT	0.0097909	0.0137978	0.0131545	0.00808112	0.0390166	0.0880965	0.101734	0.0141308	0.00152844	0.00555999	0.00223583
Staphylococcus_hominis	0.0189884	0.0111901	0.0282446	0.00783592	0.00368746	0.0031887	0.00165155	0.000604778	8.36376e-05	0.000166169	0.000488899
Solirubrobacterales_OTU_66	0.000427761	6.3787e-05	1.77033e-05	0.00783469	0.0116856	0.00704761	0.0251885	0.00974695	0.000873878	0.000248125	0.00024717
Gaiellaceae_OTU_233	2.05998e-05	2.50027e-06	0	0.00563406	0.00571169	0.00197681	3.39178e-06	2.22809e-06	1.57169e-06	0.000227307	0.00296611
Myxococcales_OTU_355	0.00366114	0.00265917	0.0023064	0.00481506	0.000124818	8.51665e-05	3.13971e-05	3.8124e-05	0.00893507	0.000894795	0.000446057
Mycoplasma_hominis	7.52897e-05	6.24396e-06	2.98679e-06	0.0047547	0.0058035	2.48695e-05	0.000417914	2.57953e-07	3.72583e-05	0.00521442	0.000225263
Mycobacterium_vaccae_BT	0.00496159	0.00122464	3.8646e-05	0.00423638	6.37702e-05	0.00540988	0.000669557	0.00421389	0.000870082	9.20419e-05	0.0587899
Clostridium_OTU_345	8.4266e-05	0.000272431	3.37313e-06	0.00421736	9.63347e-05	1.87095e-05	9.56071e-06	1.94134e-06	8.40314e-05	0.00302405	0.00123415
Aerococcus_OTU_8	0.000502815	0.000859248	0	0.00353216	7.01544e-05	1.32215e-05	0	0	0.00014822	0.00215321	0.000866148
Propionibacterium_acnes	0.00365294	0.00206124	0.000951825	0.00340754	0.000330262	1.45026e-05	0.00026058	0.000878017	0.00379998	0.000473271	0.00261438
Streptococcus_OTU_5_BT	0.00166023	0.00541737	0.000531606	0.00336137	2.94679e-05	0.000344175	3.50371e-06	1.61756e-06	0.00239834	6.32545e-05	1.10221e-05
Friedmanniella_OTU_41_BT	0.0104603	0.00547049	0.00427949	0.00324577	0.000861901	0.000168659	0.0210551	0.0253129	0.0333879	0.00123152	0.00231432
Sneathia_sanguinegens	0.000784307	8.51311e-06	0.000814992	0.00266254	0.00320669	4.09808e-05	0.00251729	3.20447e-06	0.000707849	0.00171453	0.000532989
Bacteroides_OTU_223	0.0106602	0.000637346	0.000141098	0.00245957	0.0376574	0.0319731	0.0690402	0.0263395	0.000762183	2.8379e-05	0.0225539
Ureaplasma_OTU_7	4.47833e-05	1.41195e-05	0.000945226	0.00223297	0.0017149	0	2.03078e-06	0	0.000187914	0.00420396	0.000393794
Xenococcaceae_OTU_96	0.00189333	9.12973e-05	2.26388e-06	0.00211237	0.0105511	0.0154027	0.0155265	0.00795245	0.00136139	0.00386373	0.00354747
Peptoniphilaceae_G-3_bacterium_HMT_929	0.0157433	1.99213e-05	0.000267658	0.00208555	0.000151322	0.000217212	0.000543395	1.45199e-05	0.000381258	0.00198281	0.0305031
Dialister_micraerophilus	0.000537054	0.000396074	0.000332852	0.00207115	0.000111677	1.41821e-05	1.11577e-07	2.35126e-06	0.000304925	0.0020896	0.00206885
Frigoribacterium_OTU_16	0.00164841	0.0100788	0.00204484	0.00206609	0.000231584	0.000473213	6.66312e-05	0.000188158	0.0030204	1.79623e-05	9.93443e-05
Enterobacteriaceae_OTU_653_BT	2.21936e-05	9.47196e-06	2.80456e-06	0.00205632	0.00338044	0.00679166	0.0020358	0.00484795	0.000100773	2.0904e-06	2.77024e-05
Coriobacteriaceae_OTU_206	0.00187914	0.000147399	5.61736e-06	0.00203031	0.000134354	1.73202e-05	0.0005835	1.44003e-06	0.000129589	0.0018973	0.000718841
Rothia_dentocariosa	0.0185841	0.0174099	0.0421469	0.00193803	0.000335919	7.07743e-05	0.000226458	5.71002e-05	0.0363155	0.000234152	0.000381601
Prevotella_OTU_411	0.00284253	5.79793e-05	0.00193524	0.00179567	0.00012053	7.68008e-05	0.00140988	9.50486e-06	0.00313104	0.00995855	0.0212287
Afipia_broomeae	0.0025939	0.000103357	0.00121788	0.00166137	0.000701025	1.66863e-05	0.00230993	9.68077e-05	6.94835e-05	1.09463e-05	0.000103503
Bacteroides_OTU_189	0.00299639	0.000145761	5.14033e-05	0.00164986	0.00692937	0.000569323	0.0102878	0.0228057	0.000160947	1.20723e-05	0.0034692
Lactobacillus_jensenii	0.000436723	2.80439e-05	1.45511e-05	0.00164574	4.30153e-05	0.000636411	0.000172614	2.79606e-06	2.69777e-05	0.026235	0.000519721
Prevotella_bivia	0.00897524	0.00204364	2.58257e-05	0.00156668	7.83258e-05	0.00491708	0.00226153	1.47773e-05	0.00121326	0.0118702	0.0106833
Corynebacterium_amycolatum	0.00102984	4.82279e-06	2.22616e-06	0.00150365	0.00631042	0.0301604	2.13807e-05	8.34033e-06	6.67048e-05	0.000398641	0.0056632
Dialister_OTU_93	0.000156336	0.000501808	0.000398957	0.00147224	7.05277e-05	1.32789e-05	0.0005118	1.17563e-06	0.000328001	0.00237413	0.00083638
Enterobacteriaceae_OTU_11_BT	2.91445e-05	4.43569e-06	8.44873e-06	0.00146494	0.000748625	0.00256445	0.00064897	0.00111663	4.5751e-06	6.2086e-06	3.62837e-06
Klebsiella_pneumoniae	0.00536514	0.000342302	0.000450264	0.00137751	0.00075768	0.0026943	0.0323731	0.0423877	0.000735426	0.000128064	0.000393747
Acidovorax_delafieldii	0.0115813	0.000230079	9.38851e-05	0.00135224	0.000133793	3.36985e-05	0.00218907	0	0.000370008	5.12818e-05	2.41874e-05
Streptococcus_OTU_5	0.0108127	0.0281569	0.00367031	0.00131864	2.6853e-05	0.000860446	2.82254e-05	1.48535e-06	0.0077657	0.000540727	3.88686e-05
Enterobacteriaceae_OTU_222	0.00191488	0.000135848	0	0.00108556	0.0190017	0.000711657	0.0081769	0.00377556	0.00114297	7.81759e-06	0.0055504
Corynebacterium_accolens	1.51294e-05	0.000215172	0	0.00104901	0.000138963	0.000289279	4.95412e-06	6.40894e-06	1.07949e-05	9.43594e-05	0.00270281
Prevotella_OTU_1343	6.87395e-06	0	3.05529e-06	0.00103869	3.08315e-05	0	1.11577e-07	0	1.62143e-05	0.000682807	0.00027331
Microlunatus_OTU_9	0.00223827	0.000454806	7.53375e-06	0.00102213	0.00796212	0.00487542	0.00544063	0.00309672	0.000289974	3.2468e-05	0.0105282
Enterobacter_cowanii	1.87687e-05	6.04329e-06	6.11058e-06	0.000977914	0.00203892	7.08923e-05	0.00460311	0.0185603	3.19232e-05	0.000465908	1.33344e-05
Staphylococcus_aureus	0.00100422	0.00147418	0.000443023	0.000973926	0.00115135	0.00241144	0.00800345	0.000301653	0.000155926	0.000266362	0.000127947
Alloprevotella_sp._HMT_473	0.000223454	0.00012127	0.000136939	0.000970422	0.000123702	0	1.72649e-07	1.32202e-07	0.00739031	0.000105621	3.24503e-05
Oscillospira_OTU_1144	9.38565e-05	9.11035e-05	4.0776e-06	0.000941264	3.7637e-06	4.32227e-06	1.44198e-05	0.000712005	1.19087e-05	1.42352e-06	0.000946903
Corynebacterium_OTU_620	7.43073e-06	7.16373e-07	0	0.000931718	9.2776e-06	0	3.97456e-05	0	2.00654e-05	9.91334e-05	0.000792843
Enterobacter_hormaechei	0.00641792	1.94013e-05	4.15991e-05	0.000917116	0.0211445	0.00611986	0.0466729	0.0443489	8.5019e-05	0.00165911	5.0075e-05
Anaerovorax_OTU_46_BT	0.000278131	5.40166e-05	3.49354e-05	0.000916171	0.000423068	0	0.000705933	8.19198e-07	0.000179522	2.79071e-05	0.000288732
Streptococcus_OTU_548	7.73815e-05	0.00031401	0.000961892	0.000842101	0	9.45734e-06	3.6941e-07	0	0.000406343	7.22235e-06	4.98931e-07
Dialister_OTU_72	9.72727e-06	3.68878e-06	1.61196e-05	0.000828256	6.23397e-06	3.07152e-06	1.86564e-05	0	0.000145602	0.000915636	0.000626129
Methylobacteriaceae_OTU_39	0.00820484	9.3586e-05	7.12585e-06	0.000779708	0.000590808	2.45269e-05	0.000185266	7.52574e-07	0.000172983	1.81275e-05	0.00280425
Klebsiella_oxytoca	0.000137063	4.12008e-07	0.000110695	0.000718183	0.00117428	1.54964e-05	0.0177432	0.018227	3.47349e-06	1.66371e-05	0.000205151
Granulicatella_elegans	0.00196761	0.00150873	0.00128894	0.000717593	0.00045889	2.36433e-06	3.34103e-05	5.09332e-06	0.00674029	0.000257451	1.58001e-05
Gemella_morbillorum	0.000246747	0.000917943	0.000673848	0.000704652	0.000520255	9.28898e-07	1.99672e-06	6.38579e-07	0.00316817	5.21391e-05	9.43272e-06
Neisseria_cinerea	0.00061496	0.000977682	2.20959e-05	0.000668128	3.3677e-06	0	0	0	0.00134504	6.41367e-07	1.80577e-05
Roseburia_OTU_101	1.57091e-05	3.97832e-06	0	0.00064353	7.35653e-07	0	2.06654e-06	0	4.81141e-07	7.82431e-07	0.000434113
Parvimonas_OTU_3	0.000169666	2.62905e-06	4.84655e-07	0.000618484	0.000130908	0	0	0	9.72868e-05	0.000838954	0.000492393
Corynebacterium_appendicis	5.23876e-05	3.08314e-06	0	0.000590351	0.000175135	0.000268751	2.26387e-07	0	8.18479e-05	0.000271055	0.000968176
Acidobacteriaceae_OTU_124	0.00176688	1.38555e-06	2.10768e-06	0.000583033	8.96509e-06	0	0.000294836	1.27716e-06	0.000405835	1.50413e-05	0.00242471
Klebsiella_OTU_100	0.000616943	1.15062e-06	0	0.000576023	0	0.000114797	4.68351e-05	0.00757853	2.68711e-06	5.09312e-07	2.73674e-06
Bacteroidetes_G-7_bacterium_HMT_911	0.00201147	7.98833e-06	6.19464e-06	0.000574281	2.03713e-06	3.71468e-05	4.35339e-06	2.9298e-07	5.9626e-05	9.61649e-05	0.00231223
Actinoplanes_OTU_8	3.31036e-05	0.00124302	2.66504e-06	0.000525743	0.000488054	0.000149228	0.0220382	0.00514171	0.000121364	0.000532636	0.00107319
Corynebacterium_OTU_226_BT	0.00100673	0.0053136	0.00385281	0.000521999	0.00026204	0.000152306	3.16177e-06	3.06019e-05	0.00347269	0.000162878	0.000121584
Streptococcus_oralis_subsp._dentisani	0.00429703	0.00143586	0.0389587	0.000516631	5.20004e-05	1.09109e-05	4.28023e-07	4.45474e-05	0.0041616	0.000302969	1.6338e-05
Prevotella_buccalis_BT	9.06725e-06	2.86335e-06	3.89436e-07	0.000509309	1.05119e-05	1.09735e-06	3.6941e-07	5.26218e-07	4.5913e-05	0.00101804	0.000858235
Parabacteroides_OTU_90	0.000342305	0.000437505	1.68385e-06	0.000504618	0.000127157	2.39263e-06	0.00617734	0.00141393	0.000109022	7.71823e-06	0.00511798
Ellin6075_OTU_144_BT	4.20627e-06	3.70037e-06	3.89436e-07	0.000501363	1.56123e-06	0	0.000424795	0.0016945	8.30247e-06	1.92354e-06	0.00132737
Ruminococcus_OTU_1027	0.000417708	5.17182e-05	0	0.000498948	3.39657e-06	0	0	0	4.99729e-08	3.96455e-07	0.000435383
Streptococcus_intermedius	1.75894e-05	8.57926e-06	0.000129837	0.000498557	0	0	0	0	0.000898394	6.72825e-08	5.76654e-07
Ruminococcus_OTU_644	3.48691e-05	0	7.32243e-05	0.000439415	2.31225e-07	6.18824e-07	0	0.000951892	9.30545e-06	6.15673e-07	0.000910732
Atopobium_vaginae_BT	1.47694e-05	1.33831e-05	2.14674e-05	0.000414922	4.76817e-05	3.17282e-06	6.86575e-05	1.17563e-06	2.08255e-05	0.00102261	0.000335614
Streptococcus_OTU_548_BT	4.78724e-05	0.000180523	0.000799946	0.000395965	4.57646e-06	1.32999e-06	0	0	0.000254376	4.52287e-06	0
Haemophilus_haemolyticus	0.00207757	0.00443574	0.00615923	0.000377127	8.96675e-05	0.000938369	7.40068e-07	2.42523e-05	0.00356998	2.49397e-05	8.41727e-06
Campylobacter_OTU_29	0.000285198	3.61266e-06	2.85283e-06	0.000376931	0.000119555	4.36532e-06	1.88228e-06	8.63452e-07	5.70029e-05	8.14287e-05	0.00350671
Mogibacteriaceae_OTU_328	0.000987105	1.47968e-07	3.55872e-07	0.000366934	0	0	1.11405e-06	2.29797e-07	3.17766e-05	8.57907e-06	0.00107266
Tissierellaceae_WAL_1855D_OTU_29	0.000259909	3.94434e-06	0.00104902	0.000355363	5.0627e-05	6.89931e-06	1.44925e-05	6.38579e-07	2.37288e-05	2.38875e-05	0.00398551
Prevotella_OTU_447	0.00233416	1.1281e-05	2.98008e-06	0.000349946	0	3.43642e-06	6.82906e-07	6.68146e-07	0.000301799	0.00277485	0.00480777
Prevotella_OTU_608	0.00403419	0.00015939	0.000152156	0.000325875	1.42653e-05	2.33214e-05	0.000711338	9.08334e-06	0.000146881	0.0014144	0.0171247
TM7_H1	0.00326512	0.00195913	9.41037e-06	0.000303628	0.000578147	1.54727e-05	3.14285e-05	0	0.00173027	0.00435486	0.00114661
Bacteroides_OTU_1173_BT	0.00833579	0.000262312	0.000732536	0.000281776	0.000201711	3.79524e-05	4.20414e-05	1.49362e-05	0.0011038	0.00303367	0.0445173
Gemella_OTU_18	5.1845e-05	0.000813803	4.04344e-06	0.000274469	0	0	0	0	4.29169e-05	0.000284564	0.000104135
Alicyclobacillus_OTU_43	0.000525262	0.0014136	0.00035587	0.000273894	0.000162586	0.000672609	0.00912882	0	0.000287121	3.96163e-05	0.000149802
Streptococcus_cristatus	0.0118428	0.000681746	0.00027523	0.000257718	6.99446e-06	3.97032e-06	1.74818e-05	0	0.0027998	0.00050509	3.47194e-05
Tissierellaceae_WAL_1855D_OTU_17	0.00681227	1.92446e-05	0.000119288	0.00024302	3.788e-06	0	0.000879267	1.57223e-06	7.52266e-05	0.000208803	0.00794775
Streptococcus_sp._HMT_423	0.000717789	0.0136701	0.00143082	0.000241919	2.62572e-05	0.000399085	3.44021e-06	5.34713e-06	0.00978172	0.000165155	6.16534e-06
Prevotella_buccalis	0.00217291	0.000125962	0.00019035	0.00022625	0.000112554	1.19007e-05	7.22635e-05	7.89935e-06	0.000236584	0.00263417	0.0094421
Streptophyta_OTU_179_BT	0.000123841	0.000401978	0.000367083	0.000222694	4.2549e-05	2.00988e-05	2.84544e-05	4.56467e-05	0.000486187	5.93972e-06	3.52283e-05
Bacteroides_OTU_207	0.000341178	4.03955e-05	6.38047e-06	0.000210403	0.000525604	0.00328056	0.00447386	0.00187983	1.79928e-05	2.36578e-06	0.00204122
Staphylococcus_OTU_45_BT	9.7371e-05	5.56296e-05	9.82969e-05	0.00020395	0.000327585	0	0.01054	0.000410172	0.000289443	0.000249378	0.000432271
Streptococcus_OTU_390	0.000159516	0.000197462	1.02935e-05	0.000202303	0	6.7053e-05	4.26407e-07	0	0.000164247	5.82104e-06	4.02927e-07
Enterobacteriaceae_OTU_561_BT	3.37463e-06	3.55005e-07	0	0.000200288	0.000241384	0.00158204	0.000658078	0.000141991	1.41921e-07	7.76032e-07	2.45129e-07
Anaerococcus_tetradius	0.000613634	0.000273113	1.29279e-05	0.000193038	9.01479e-06	0	0.000250619	0	6.16264e-05	0.000512997	0.000643041
Anaerococcus_OTU_140	0.00440134	0.00686608	0.00489602	0.000192475	0.00546239	7.05336e-06	0.000175487	4.50503e-06	0.00338648	6.93623e-06	0.000348418
Erythrobacteraceae_OTU_53_BT	0.000279992	0	0	0.000192131	0	3.8652e-05	0	0	2.60017e-06	0.000355308	0.00022409
Porphyromonas_OTU_60	8.26793e-07	1.18373e-06	3.45817e-06	0.00017591	0	3.71294e-06	0	0	6.704e-05	0.000222586	0.000389155
Bergeyella_sp._HMT_206	0.000128093	0.000377036	0.0016335	0.000168138	4.82984e-05	1.89147e-05	3.53933e-05	7.14574e-07	0.0057653	0.000124849	2.54622e-06
Streptococcus_OTU_252	0.000119618	0.000240677	0.000266817	0.000166615	4.3796e-05	2.73012e-05	0	0	0.000237871	5.46777e-06	4.88914e-07
Abiotrophia_defectiva	0.000362942	0.00035923	7.86737e-05	0.000165251	3.42242e-05	2.84286e-06	2.47054e-06	0	0.00269048	4.34071e-05	5.99854e-06
Prevotella_OTU_842	0.00279776	2.08627e-05	9.87397e-05	0.000163939	1.90776e-05	8.46657e-06	0.000371726	5.40161e-06	0.00086142	0.00328325	0.00914087
Parabacteroides_distasonis	0.000774475	0	0	0.000161957	0.000357492	0.000460039	0.00856194	0.000972034	8.81299e-07	2.72509e-07	0.000490099
Corynebacterium_OTU_135	0.000737955	4.92743e-06	8.40265e-07	0.000155847	0.000122972	0	3.34878e-05	2.41898e-06	0.000142941	0.000892428	0.00573039
Lachnospiraceae_OTU_2772_BT	0.000497404	2.80569e-05	0	0.000155525	1.94234e-05	0.000521545	3.97282e-05	0.000194099	0.00313597	0.000175052	0.00112415
Streptococcus_OTU_148_BT	0.000132118	0.00133429	0.000240894	0.000149226	0.00282006	0.000192405	0	1.17563e-06	0.000216392	9.66074e-07	3.07013e-07
Prevotella_OTU_366	0.00502298	1.45568e-05	0.00115833	0.000146368	0.000212212	2.82374e-05	7.40669e-06	3.01391e-06	0.000223202	0.000138389	0.0140845
Prevotella_OTU_847	0.0130491	0.000115216	0.000872898	0.000142786	8.96699e-05	0.00276827	1.01053e-05	2.14609e-05	0.00135822	0.00157203	0.0446469
Streptococcus_infantis	0.000329962	0.00498296	0.00568962	0.000125094	0.000280515	0	2.70238e-05	2.57953e-07	0.00203792	2.62897e-05	8.68041e-06
Porphyromonas_OTU_49	0.000442554	7.29814e-07	1.35266e-05	0.000113963	1.28365e-05	0	2.05311e-06	4.59414e-06	6.86591e-05	8.74037e-05	0.00376114
Rikenellaceae_OTU_113	0	0	0	0.000104893	0	0	6.42843e-07	0	9.02909e-07	3.4674e-06	0.000763243
Campylobacter_ureolyticus	0.00115595	3.79315e-05	5.51198e-06	0.000102497	0.000319227	4.06869e-06	5.33048e-05	1.48193e-05	0.000127902	0.00114988	0.00614662
Enterobacter_hormaechei_BT	2.84284e-05	4.67559e-06	4.40812e-06	8.95445e-05	0.000999636	0.000863481	0.00120697	0.00138249	3.73531e-06	4.92596e-06	1.01784e-05
Fusobacterium_nucleatum_subsp._animalis	0.000420128	6.10985e-05	0.000364542	8.16562e-05	4.83706e-05	5.80653e-05	0.000161548	1.73552e-05	0.0024788	0.000658268	0.00135034
Escherichia_coli_BT	3.71993e-05	9.44286e-06	1.75823e-05	8.12411e-05	0.000415053	0.00147644	0.0127344	0.0011007	1.42173e-05	6.0214e-06	6.79917e-06
Prevotella_OTU_412	9.03778e-05	1.58483e-06	7.14851e-05	7.72929e-05	3.77674e-06	1.23765e-06	0.000110716	0	0.000248106	0.000477723	0.00134091
Streptococcus_gordonii	0.000835975	0.00189783	0.00283221	7.35593e-05	1.33697e-05	0	7.50136e-06	5.96203e-07	0.00546778	3.4074e-05	2.23844e-05
Fibrobacteria_258ds10_OTU_4_BT	0.00363164	0.00101813	0.00100061	7.32276e-05	0.00646013	0.00269531	0.0216539	0.0109086	0.000225574	0.000145284	0.000359206
Enterobacter_cowanii_BT	8.6652e-05	2.14119e-05	3.57324e-05	7.18895e-05	0.000675304	0.000263835	0.00141965	0.00124397	2.2128e-05	5.9678e-06	2.82274e-05
Mobiluncus_OTU_1	0.00112351	4.53176e-06	8.02286e-06	7.00574e-05	4.67456e-06	0	8.74052e-07	0	3.54749e-05	0.000228761	0.00146168
Gemella_sanguinis	0.00018226	8.57885e-05	0.000159	6.51985e-05	6.59718e-05	0	4.49422e-07	0	0.000793011	1.11982e-05	4.24207e-05
Actinomyces_sp._HMT_175	0.000427517	0.000211208	4.29225e-05	6.49121e-05	4.979e-06	0	0	0	0.00123978	1.50979e-06	6.72774e-07
Dialister_OTU_87	0.0018885	0.000149643	9.15365e-05	6.38344e-05	1.55653e-05	0.00015088	1.69365e-05	4.89301e-06	0.00026433	0.000941391	0.00594746
Porphyromonas_pasteri	0.000431207	0.000966008	0.000265893	6.35136e-05	0.000362618	7.56881e-06	3.93986e-07	9.04168e-06	0.00524193	7.281e-05	6.61745e-05
Lactobacillus_iners_BT	7.34301e-06	2.65641e-05	3.11426e-06	6.2023e-05	2.27956e-05	1.9801e-05	1.68189e-05	3.90307e-06	5.18512e-05	0.00151521	0.000376202
Peptoniphilus_indolicus	0.000666717	1.01928e-05	5.36686e-06	6.05769e-05	1.40172e-05	6.18824e-07	0.000100877	9.41539e-06	0.00027577	0.00132823	0.00529157
Neisseria_flava	0.00160829	0.00104338	0.00131853	6.01034e-05	0.000126665	2.96886e-05	1.21421e-05	0.000215921	0.00927871	0.000456399	1.62259e-05
Porphyromonas_OTU_36	0.000326804	3.00826e-07	3.48525e-06	5.98906e-05	4.11013e-05	0	2.2281e-07	1.91574e-06	3.80648e-05	6.77978e-06	0.00292564
Shuttleworthia_satelles	2.56526e-05	1.26867e-05	2.28231e-05	5.92971e-05	0	0	0	0	0.000304907	8.93883e-07	1.83421e-07
Enterobacteriaceae_OTU_653	1.12592e-05	1.1771e-06	0	5.91264e-05	0.000804213	0.00111641	0.000472854	0.000667073	3.50304e-06	6.1249e-07	2.33834e-06
Streptococcus_OTU_252_BT	5.81659e-05	0.000143151	0.000268328	5.78087e-05	2.75229e-05	7.71057e-06	0	0	0.000103666	3.13542e-06	7.90002e-07
S24-7_OTU_1554_BT	8.95519e-05	0	3.55872e-07	5.53085e-05	3.74399e-06	0	0	0	1.627e-05	7.44426e-06	0.000426616
Tissierellaceae_ph2_OTU_4	0.00335066	2.30576e-05	1.15169e-05	5.5145e-05	6.64542e-06	9.57965e-07	2.05048e-05	0	6.48486e-05	0.000150441	0.00524542
Mobiluncus_mulieris	0.000287059	1.56534e-06	3.11601e-06	5.23783e-05	7.62041e-05	2.2102e-06	9.50364e-06	0	4.61933e-05	0.000310418	0.00112614
Streptococcus_OTU_205_BT	6.08087e-06	0.000129055	4.41025e-05	5.02344e-05	7.05918e-06	1.19699e-05	0	0	4.91104e-05	1.61408e-06	1.47918e-07
Methylobacteriaceae_OTU_39_BT	0.000415136	1.99149e-06	2.61963e-06	4.74057e-05	2.3545e-05	3.35288e-05	1.03314e-05	6.68146e-07	5.4083e-06	2.05001e-06	0.000154587
Bacteroidetes_G-3_bacterium_HMT_365_BT	0.000108311	3.91336e-07	0	4.67931e-05	6.31698e-07	0	0	0	3.72837e-05	4.47387e-05	0.000510169
Porphyromonas_OTU_112	0.00139609	3.01427e-06	1.06687e-05	4.60904e-05	4.76149e-05	0	3.90719e-06	4.48163e-06	0.000132619	4.37651e-05	0.00818009
Enterobacteriaceae_OTU_490	5.21533e-06	6.05869e-06	6.50002e-06	4.57999e-05	0.000580779	0.000475117	0.00112015	0.000330606	3.99111e-06	7.16523e-07	1.3347e-06
Collinsella_aerofaciens	7.1067e-06	8.14527e-06	0	4.37704e-05	3.53625e-06	2.00981e-05	4.65431e-06	5.67824e-05	7.0217e-05	1.19027e-05	0.00435999
Sutterella_OTU_62	0.000161918	7.84702e-06	4.26443e-06	4.37119e-05	2.46464e-06	0.000250935	0.000172887	0.00763154	7.49232e-05	0.000149196	0.00077043
Tissierellaceae_1_68_OTU_12	0.00441879	5.05648e-06	0.00043006	4.04202e-05	8.69649e-05	8.76192e-06	7.27405e-06	1.07907e-05	0.000109885	0.000561494	0.0110336
Dialister_OTU_4	0.00445137	1.81988e-05	0.000633423	3.98622e-05	1.95418e-05	5.44597e-06	2.28154e-05	0	0.000330991	0.00100444	0.0112621
Campylobacter_OTU_28	0.000606075	1.76367e-05	1.56018e-05	3.9396e-05	3.12973e-05	2.18253e-05	3.03131e-06	6.72106e-06	0.000282174	9.36835e-05	0.0119331
Ruminococcaceae_OTU_3386	6.04243e-05	0.000296258	0.000289258	3.91606e-05	0.000101201	0	6.12097e-06	2.79156e-06	0.00354159	2.44955e-05	4.73605e-05
Finegoldia_magna	0.0016646	0.000235631	0.000119328	3.90064e-05	0.0003758	0	2.35988e-05	8.11263e-06	0.000150252	0.0014021	0.00861793
Actinomyces_odontolyticus	0.000630105	0.00074378	0.00018002	3.83443e-05	5.76481e-05	0	6.45288e-07	1.03149e-05	0.0030037	8.64244e-05	7.24013e-05
WAL_1855D_OTU_2_BT	0.000119847	0.000421228	2.82275e-05	3.78477e-05	1.74276e-05	0.000584752	0.00571018	0.00277585	5.30536e-05	7.39455e-06	4.01803e-05
Bacteroidetes_G-7_bacterium_HMT_911_BT	4.40001e-05	0	0	3.68723e-05	1.38973e-06	0	0	0	3.06037e-06	9.39965e-06	0.000399351
Leptotrichia_hongkongensis	0.00012273	0.000589147	0	3.61862e-05	3.65751e-07	4.43328e-07	0	0	0.00193646	4.13402e-06	3.16375e-06
Dialister_OTU_77	2.82176e-05	0	1.88352e-06	3.57772e-05	0.000106747	0	5.33231e-07	0	3.15898e-05	0.000471205	0.000109641
Prevotella_oris	0.000181633	0.000292589	0.00036944	3.50356e-05	2.09692e-06	7.55087e-06	4.35226e-06	4.45474e-06	0.00283235	1.63196e-05	2.44622e-06
Porphyromonas_OTU_79	2.47882e-05	0	1.10514e-06	3.44798e-05	5.01725e-05	6.18824e-07	0	0	1.8409e-05	2.41262e-07	0.000953647
Gardnerella_vaginalis_BT	1.96516e-05	1.53997e-05	5.32712e-06	3.37909e-05	2.2522e-05	1.94595e-05	1.60041e-05	1.17857e-06	6.11923e-05	0.00147675	0.000420358
Peptoniphilaceae_G-3_bacterium_HMT_929_BT	0.000297896	4.23495e-07	0	3.14871e-05	1.14399e-05	1.23002e-05	1.41882e-06	3.20447e-06	2.49496e-05	6.83947e-05	0.000987617
Prevotella_OTU_606	0.000913588	3.66741e-06	7.25024e-06	3.1444e-05	1.2634e-07	6.18824e-07	0.000343906	1.32202e-07	6.78585e-05	0.000380341	0.00320406
Stenotrophomonas_acidaminiphila	2.89782e-05	0.000151032	0.000138089	3.13482e-05	0	0	0	0	0.000563209	1.34645e-05	1.06923e-06
Enterobacteriaceae_OTU_274	2.64889e-06	0	0	3.00949e-05	5.74782e-05	0.00021512	7.9807e-05	0.000199089	2.1521e-06	4.25388e-07	1.12544e-06
Burkholderiales_OTU_73_BT	0.000367672	0.000260458	0.000697869	2.82121e-05	5.18579e-06	0	4.04e-06	9.23595e-07	0.00171561	4.57935e-05	3.91013e-06
Enterococcus_faecalis	0.000336591	0.000126154	0.00090061	2.80928e-05	0.0466185	0.0683919	0.0658777	0.0781691	3.13172e-05	8.34964e-05	8.31924e-05
Neisseria_oralis	9.0647e-05	0.000567845	1.47517e-05	2.75713e-05	5.17948e-06	0	1.34827e-06	0	0.00158732	4.44674e-07	2.38754e-06
Clostridiales_F-1G-1_bacterium_HMT_093	2.68458e-06	5.50968e-06	0	2.75713e-05	1.77248e-07	0	0	0	0.000325171	1.95367e-06	4.12406e-07
Acidaminococcus_OTU_48	2.86089e-05	0.00116278	0.000107306	2.7216e-05	4.0773e-06	2.8176e-06	2.45318e-06	1.27716e-06	2.04573e-06	1.00915e-05	0.00234877
Dialister_invisus	0.000725545	0.00394275	6.79011e-05	2.70779e-05	1.32086e-05	0	2.27568e-06	2.55199e-06	0.00104315	2.24338e-05	0.00741665
Lachnospiraceae_OTU_3692_BT	0.000195922	1.01243e-05	0	2.69103e-05	0.000844655	0.000317521	6.21024e-07	0	1.1222e-05	7.83168e-05	0.000577257
Saccharibacteria_(TM7)_G-1_bacterium_HMT_346	5.61101e-05	6.00679e-05	0	2.68159e-05	2.07021e-06	0	0	0	0.000497236	3.33361e-07	9.27963e-07
BVAB1_BT	3.97211e-06	1.67707e-05	1.7535e-05	2.56787e-05	8.83445e-06	7.58099e-06	5.18606e-06	0	0.000104144	0.00143538	0.000247987
Actinomyces_sp._HMT_172	0.000287625	0.000324681	0.000258673	2.43116e-05	1.36923e-05	0	1.85205e-07	2.22737e-05	0.0016803	2.85966e-05	1.55184e-05
Streptococcus_sp._HMT_074	8.99217e-05	0.000185515	0.00033608	2.4286e-05	4.05051e-06	0	0	1.31042e-06	0.00128374	2.36763e-05	3.62956e-05
Prevotella_sp._HMT_443	2.6672e-06	0	0	2.41721e-05	0	2.34451e-06	0	0	0.0001122	1.25524e-06	0
Atopobium_sp._HMT_810	0.000359938	5.18949e-06	0.0001017	2.3967e-05	0	4.32227e-06	0	1.17563e-06	1.47719e-05	5.59048e-05	0.00138371
Rikenellaceae_OTU_240	0.000767399	0.000425081	5.52572e-07	2.31815e-05	9.02011e-06	0	7.6583e-05	0	2.23848e-05	9.97941e-06	0.00324542
Flavobacterium_OTU_559	2.81546e-05	1.61742e-05	1.20882e-06	2.26795e-05	2.17553e-07	3.01776e-05	8.14455e-06	1.78639e-05	6.22122e-06	2.92345e-06	0.0018187
Streptococcus_pneumoniae_BT	1.72929e-05	3.87007e-05	0.000120427	2.26742e-05	4.979e-06	1.64032e-05	0	0	6.02815e-05	3.32825e-06	2.28504e-06
Ruminococcus_OTU_1250	8.7862e-05	0.000150903	5.80034e-07	2.26613e-05	1.01317e-05	0	2.06654e-06	0	0.000574717	1.51018e-06	0.000103539
Filifactor_alocis	9.47918e-05	3.88726e-05	0	2.22836e-05	9.67065e-06	2.36433e-06	0	9.28001e-07	0.0004817	3.11529e-06	4.96089e-07
Moryella_OTU_13	2.13762e-05	1.62104e-05	1.39674e-06	2.20263e-05	0.000155806	6.19268e-06	0.00017148	5.96981e-05	2.99885e-05	0.000215404	0.00108006
Prevotella_OTU_842_BT	3.93474e-05	4.78819e-06	9.94855e-06	2.1869e-05	1.93918e-06	3.1285e-06	5.16849e-06	6.68146e-07	2.32453e-05	0.000504358	0.00222912
Streptococcus_mitis_BT	2.38185e-05	0.000318859	6.51667e-05	2.13909e-05	3.42578e-05	4.88709e-05	0	0	8.99187e-05	3.26229e-06	2.63947e-06
Sneathia_amnii_BT	1.03834e-06	6.11597e-07	7.23875e-07	2.13051e-05	1.10832e-05	0	1.59969e-06	0	1.6096e-05	0.000311527	7.16076e-05
Hyphomicrobium_OTU_169	0.000167132	3.73555e-05	2.16553e-05	2.11356e-05	2.32326e-05	2.05098e-05	0.00173111	0.000170664	8.17511e-06	7.58638e-06	2.00716e-06
Peptoniphilus_OTU_11	0.00275913	0.000273186	0.000559898	2.02798e-05	5.15621e-05	2.8176e-06	3.25123e-06	2.7571e-06	0.000374573	0.000149652	0.0103339
Bacteroides_OTU_606	0.000101784	2.36959e-05	0	1.98113e-05	0.0112428	0.0040186	0.0197159	0.000996726	7.58361e-05	1.77242e-05	0.00731371
Atopobium_parvulum	0.000146947	0.000416554	9.8903e-05	1.92621e-05	6.5841e-06	0	1.41074e-06	8.90948e-06	0.00074063	3.19848e-05	2.55799e-05
Actinomyces_sp._HMT_171	0.000143322	1.64188e-06	0	1.89049e-05	2.4895e-06	0	0	0	0.000332344	0	0
Leptotrichia_sp._HMT_215	8.16585e-05	6.91359e-05	0	1.87315e-05	2.4895e-06	0	4.49422e-07	4.45474e-06	0.00090128	7.65152e-06	4.28137e-06
Tannerella_forsythia	3.00168e-05	4.86436e-06	1.56158e-05	1.85067e-05	0	0	1.18956e-06	0	0.000463118	4.43583e-06	2.13439e-07
Anaerococcus_OTU_104	0.000178949	0	0	1.84362e-05	1.13706e-06	0	0	0	5.38736e-07	2.23964e-06	0.000221929
Bacteroides_OTU_223_BT	3.73084e-06	2.06873e-05	0	1.78916e-05	7.45199e-05	0.000273905	0.00102752	0.000601415	1.45315e-05	7.7931e-08	0.000813527
Fusobacterium_periodonticum	0.000414981	0.000242782	2.72344e-06	1.65037e-05	0.000107329	0	4.49422e-07	4.45474e-06	0.00150134	1.17787e-05	2.35169e-05
Bacteroides_OTU_975	0.00202173	3.70344e-06	0	1.63621e-05	0.00418417	0.00122112	0.00353633	0.00429697	6.42222e-06	3.45288e-07	0.000929716
Leptotrichia_sp._HMT_417	0.000101335	9.25324e-05	8.81651e-05	1.61483e-05	9.50563e-06	0	0	4.64001e-07	0.000595245	2.10334e-05	2.46417e-06
Lactobacillus_gasseri	0.00117268	0.0002279	4.45712e-05	1.57444e-05	0.00203644	0.0010043	0.00069694	3.26314e-06	0.00141242	0.0479122	0.00666274
Bacteroides_OTU_479	5.04706e-05	6.412e-06	0	1.56877e-05	0.00155028	0.000260316	0.00199233	0.000230869	2.28917e-06	1.63057e-07	0.00014415
Peptoniphilus_OTU_60	0.000692908	3.14912e-06	0.000332171	1.54374e-05	3.34545e-06	6.18824e-07	8.91241e-07	0	4.39892e-05	0.000783566	0.00330145
Porphyromonas_gingivalis	6.00486e-06	2.75365e-05	0	1.54328e-05	7.75576e-05	0	0	9.28001e-07	0.00139786	1.69813e-05	2.15013e-06
Stomatobaculum_sp._HMT_097	4.20526e-05	5.74258e-05	5.80034e-07	1.47962e-05	0	0	1.18956e-06	8.90948e-06	0.000513312	7.47595e-06	5.29974e-07
Prevotella_OTU_365	0.000161791	0	0.00012156	1.47489e-05	6.19064e-06	0	3.21422e-07	0	4.01385e-06	1.34072e-05	0.000890761
Parabacteroides_OTU_27_BT	0.000289084	0.000734174	0.000160776	1.43522e-05	8.10965e-06	2.36433e-06	1.85205e-07	4.45474e-06	0.0013425	2.47021e-06	1.59573e-05
Ruminococcaceae_OTU_1944	0.000608734	3.11113e-07	0.000118525	1.4102e-05	1.08652e-05	2.34451e-06	1.28313e-05	1.5987e-06	2.58039e-06	1.59694e-05	0.00382817
Bacteroides_OTU_205	0.000464177	0.000326334	0	1.4102e-05	0.000314559	0	0.000744581	0.00107563	1.17836e-06	5.3888e-06	0.00327686
Anaerococcus_OTU_496	0.00129862	2.1642e-05	7.11744e-07	1.40612e-05	0	0	4.4775e-06	0	5.4561e-06	6.22669e-06	0.00201653
Peptoniphilus_OTU_79	0.0018937	5.34716e-06	1.66279e-05	1.35201e-05	1.33295e-05	0	2.00025e-05	0	0.000136551	0.000158109	0.0078797
Streptococcus_peroris	0.000410393	0.000253998	1.49246e-05	1.32359e-05	9.70296e-05	0	7.86112e-06	0	0.000784724	1.19108e-06	7.0614e-05
Oribacterium_sinus	0.000196494	0.000103752	0.000202128	1.32191e-05	6.61874e-06	1.77797e-06	7.76436e-07	0	0.00161678	1.83023e-05	5.89705e-05
Prevotella_pleuritidis	0.000480082	0.000167432	6.25906e-05	1.32045e-05	1.42266e-05	0	0	9.19188e-07	0.00217096	7.21229e-06	5.8511e-06
Peptoniphilus_OTU_93	0.0001145	2.40415e-06	0	1.29053e-05	5.33698e-06	1.02147e-05	2.2281e-07	1.27716e-06	1.28062e-05	9.10094e-05	0.000577149
Sinobacteraceae_OTU_237	0.00209252	4.83456e-05	1.79592e-06	1.28414e-05	1.03581e-05	4.31109e-06	2.37911e-06	0	0.000581539	2.96448e-06	1.60327e-06
Peptoniphilus_lacrimalis	0.0022101	5.36754e-05	1.78885e-06	1.2125e-05	2.55751e-06	4.53377e-06	1.68245e-07	0	3.5596e-05	0.000107263	0.00145579
Klebsiella_aerogenes	0.000546042	1.3294e-05	1.47564e-05	1.17323e-05	4.81113e-05	0.000108101	0.00241095	0.0584639	0.00101627	0.000254974	0.00052055
Actinomyces_sp._HMT_169	0.000222168	0.00016044	0.000416072	1.13307e-05	1.91728e-07	0	0	4.8719e-07	0.00412836	4.78686e-06	2.95493e-05
Porphyromonas_sp._HMT_930	0.000240392	3.10454e-05	0.000540404	1.11673e-05	0.000250914	0	0	0	0.00182831	1.07082e-05	2.34641e-06
Porphyromonas_OTU_51	0.000758929	0	3.45817e-06	1.10617e-05	1.05663e-05	0	2.10098e-05	9.95654e-07	5.14469e-06	3.42259e-06	0.000969505
Anaerococcus_OTU_471	7.14231e-05	1.84608e-05	1.69941e-06	1.10617e-05	2.68641e-05	0.000383194	0	0	1.34399e-06	2.01242e-05	0.000618149
Mogibacterium_OTU_125	1.87772e-05	3.90465e-07	0.000113904	1.10617e-05	2.26924e-06	0	0	0	2.09207e-06	1.47923e-05	0.000635853
Ruminococcaceae_OTU_1007	1.5778e-05	0	0	1.10617e-05	0	0	3.14876e-07	0	0	9.23275e-07	0.000315375
Actinomyces_lingnae_Not_Validly_Published	0.000142621	5.74261e-05	1.6817e-05	1.05753e-05	1.12028e-05	0	0	0	0.000348558	8.42194e-06	2.91058e-05
Streptococcus_sp._HMT_064	0.000242691	0.00103955	0.00149651	1.03716e-05	1.75384e-05	2.36433e-06	3.03623e-06	2.01458e-06	0.00552932	3.51156e-06	1.027e-05
Sneathia_sanguinegens_BT	0	1.76607e-07	4.0776e-06	1.02452e-05	1.06206e-05	4.31109e-06	0.00134648	0	3.1623e-06	9.4868e-05	0.000100286
Ruminococcus_torques	8.79246e-05	3.34179e-05	5.52572e-07	9.21809e-06	4.3652e-06	0	0	0	4.98034e-07	0	0.000781667
Peptoniphilus_OTU_41	5.74168e-05	3.90465e-07	0	9.21809e-06	0	0	0	0	7.23261e-06	3.87029e-06	0.000464585
Fusobacterium_naviforme	4.88977e-05	0.000389891	0.000175409	9.06453e-06	5.06496e-06	5.11253e-06	2.49933e-06	2.55199e-06	0.00264712	2.88008e-05	0.000175366
Peptoniphilus_OTU_92	0.000184384	5.4939e-07	0	8.9751e-06	0	0	0	0	4.10722e-05	4.43897e-05	0.000546971
Porphyromonas_OTU_33	0.00158133	6.56067e-06	8.98717e-06	8.9132e-06	3.63242e-05	5.28023e-06	1.2573e-05	0	3.22241e-05	2.29319e-05	0.0071047
Porphyromonas_OTU_126	0.0136167	4.30626e-06	7.43098e-06	8.73927e-06	2.06932e-05	2.30075e-06	2.50376e-06	9.97635e-06	0.00049597	0.000279879	0.00945119
Saccharibacteria_(TM7)_G-1_bacterium_HMT_347	1.55796e-05	4.72857e-05	0	8.68684e-06	0	0	0	0	0.000557656	2.02981e-06	8.05026e-07
Ruminococcus_OTU_1250_BT	0.000159113	3.31538e-05	5.80034e-07	8.32959e-06	1.08971e-05	0	0	4.45474e-06	0.000854291	6.52154e-07	4.24848e-06
Streptococcus_OTU_243	0.000226695	3.50405e-05	2.48153e-05	8.21817e-06	9.60689e-07	8.86657e-07	0	0	0.000104635	4.23131e-07	4.93636e-07
Prevotella_sp._HMT_317	1.44535e-05	3.62506e-05	7.25746e-05	8.19457e-06	2.4895e-06	2.34451e-06	0	2.29797e-07	0.000605996	1.24351e-06	9.93706e-07
Peptoniphilus_OTU_102	0.000332881	4.37615e-06	2.92438e-06	8.13145e-06	4.61914e-06	3.5895e-06	5.67234e-07	1.17563e-06	5.52372e-05	7.50861e-05	0.00159026
Porphyromonas_OTU_70	0.000186938	7.83178e-06	3.55872e-07	8.08029e-06	2.6405e-05	4.32227e-06	7.83397e-06	0	0.00013067	0.000232376	0.00180696
Tissierellaceae_WAL_1855D_OTU_19	3.00476e-05	4.55268e-05	4.88162e-05	7.7573e-06	1.44064e-06	0	4.85064e-06	0	1.62368e-06	1.47389e-05	0.00265093
Parvimonas_OTU_3_BT	9.7302e-07	0	0	7.45162e-06	1.43748e-07	0	0	0	1.30881e-05	7.92998e-05	2.89081e-05
Pyramidobacter_OTU_2	0.000584761	3.11113e-07	0	7.37447e-06	1.53672e-05	0	8.98112e-06	6.38579e-07	5.18693e-05	3.52928e-05	0.00206069
Peptoniphilus_OTU_89	0.00018644	9.86567e-07	0	7.37447e-06	0	0	0	0	1.41079e-07	9.27232e-06	0.000571133
Anaerococcus_OTU_297	9.57764e-05	5.4939e-07	3.89436e-07	7.37447e-06	3.41117e-06	0	3.21822e-07	0	9.22124e-06	2.38873e-06	0.000334139
Mobiluncus_OTU_1_BT	1.3156e-05	0	3.4802e-06	7.37447e-06	1.2634e-07	0	0	0	2.07949e-06	1.17296e-05	5.59565e-05
WAL_1855D_OTU_10	7.04268e-05	3.9794e-07	0	7.33893e-06	0	0	1.84802e-05	0	6.15908e-07	2.11658e-06	6.93711e-05
Streptococcus_oralis_subsp._tigurinus	0.00214899	0.000109628	0.00017111	7.28144e-06	1.91264e-06	0	2.14164e-06	4.45474e-06	0.00122878	0.000103551	4.87267e-05
Corynebacterium_tuscaniense	3.78019e-05	2.33708e-06	0	7.27656e-06	2.73328e-06	0	2.2281e-07	4.24146e-06	6.20745e-05	0.000455228	0.00192262
Gemella_morbillorum_BT	4.24151e-06	1.18788e-05	0	7.17608e-06	7.4685e-06	0	0	0	9.84582e-05	7.45303e-06	1.80941e-06
Bacteroides_OTU_1018	0.000102341	5.4569e-06	0	7.03325e-06	0.00283892	0.000445045	0.00496972	0.000343723	0.000114233	1.08979e-06	0.00157713
Chitinophagaceae_OTU_336_BT	1.00344e-05	7.43754e-06	0	6.79839e-06	0	0	0	4.64001e-07	0.000506615	2.51805e-06	1.29438e-06
Corynebacterium_OTU_725	0.000556537	7.02304e-07	0	6.72757e-06	1.9891e-06	0	0	0	1.56304e-05	3.90604e-05	0.000760446
Sutterella_OTU_136	2.87361e-05	0	0	6.72757e-06	2.03713e-06	0	5.91109e-05	6.77275e-08	1.07489e-06	2.00447e-07	0.00110649
Bacteroides_OTU_1320	2.04091e-05	5.13394e-06	0	6.72757e-06	0.000121662	0.00046778	0.000353234	0.000221961	2.06089e-06	0	5.80195e-05
Phascolarctobacterium_OTU_87	1.22714e-05	1.89431e-06	5.52572e-07	6.72757e-06	4.01741e-06	0	5.1247e-05	4.20932e-05	3.63531e-05	7.44991e-06	0.00106688
Megasphaera_OTU_45	7.7436e-06	0	5.79207e-06	6.72757e-06	1.24828e-06	0	2.2281e-07	6.58016e-06	1.85084e-06	1.17279e-05	0.00293223
Tissierellaceae_OTU_50	5.78576e-06	3.91336e-07	1.20882e-06	6.72757e-06	0	0	0	0	4.78135e-06	6.77121e-05	0.000218127
Peptoniphilus_OTU_39	2.08636e-06	7.95664e-07	0	6.72757e-06	2.52679e-06	0	0	0	1.77832e-06	1.95947e-06	9.5195e-05
Ruminococcus_OTU_626	1.00951e-06	0	0	6.72757e-06	8.84377e-07	0	0	0	3.11049e-06	8.69475e-08	0.000202666
Prevotella_OTU_366_BT	7.85882e-07	1.02684e-06	0	6.72757e-06	1.2634e-06	1.85647e-06	0	2.29797e-07	1.14927e-07	1.26987e-06	0.000597125
Blautia_OTU_582	4.41752e-07	1.14519e-05	7.15086e-06	6.72757e-06	1.76875e-06	0	1.03327e-06	0	0	1.35194e-07	0.000234409
Megasphaera_OTU_41	0	0	0	6.72757e-06	8.93916e-07	9.28898e-07	2.2281e-07	0	3.70024e-08	1.91048e-06	0.000523057
Ruminococcus_OTU_807	0	2.78482e-06	0	6.72757e-06	0	0	7.23289e-06	0	2.77897e-06	1.40117e-06	0.000368128
Turicibacter_OTU_21	0	0.000129693	0	6.72757e-06	3.53751e-06	0	3.78866e-06	0	1.33353e-06	1.81014e-07	0.00014457
Clostridium_OTU_345_BT	0	1.09373e-06	4.45745e-06	6.57543e-06	1.65168e-06	0	9.24832e-07	0	1.29967e-05	0.000157318	0.000502955
Gemellaceae_OTU_1	0.000434454	7.30339e-05	0.000781619	6.44884e-06	5.47318e-06	0	0	0	0.000247098	6.04228e-06	3.23835e-06
Lautropia_mirabilis	0.00137361	0.00058789	0.000315837	6.42763e-06	4.33185e-05	9.42911e-06	8.69641e-06	6.83298e-06	0.0101341	2.00583e-05	1.19159e-05
Neisseria_sicca	0.000552014	0.00115684	0.000413218	6.42137e-06	2.26708e-05	6.7117e-05	1.39407e-06	0	0.00398558	1.33396e-06	6.86927e-06
Leptotrichia_sp._HMT_221	0.000286591	8.46421e-05	2.32013e-05	6.42071e-06	0	0	0	0	0.000407313	2.24141e-05	4.20374e-06
Clostridiales_OTU_2020	0.000175632	9.58142e-05	3.55872e-07	6.14418e-06	2.96571e-06	0	2.81233e-05	0.00484532	0.00102906	7.81457e-06	0.00111525
Saccharibacteria_(TM7)_G-6_bacterium_HMT_870	3.36704e-05	0.000237325	5.38776e-06	6.04302e-06	6.80676e-06	0	0	0	0.00138346	1.12667e-06	1.01e-05
Corynebacterium_amycolatum_BT	1.29768e-05	2.98065e-06	0	5.93451e-06	0.000153681	0.000434743	9.64265e-07	0	6.27551e-07	1.36355e-05	0.000183252
Lactobacillus_crispatus_BT	5.05383e-06	1.05774e-06	0	5.87085e-06	3.76035e-07	4.85002e-06	1.44475e-05	6.4947e-06	1.45123e-05	0.000134865	1.79302e-05
Fusobacterium_hwasookii	0.000354507	0.000157498	0.000160015	5.80484e-06	1.15158e-05	1.33732e-05	1.54073e-06	4.45474e-06	0.0019681	4.72774e-06	7.23111e-06
Gemella_haemolysans_BT	6.67315e-06	0.000135521	8.91202e-05	5.70754e-06	6.35101e-06	0	1.7103e-06	6.38579e-07	5.76502e-05	4.7032e-06	1.45134e-06
Porphyromonas_OTU_7	0.000684335	0	9.08444e-07	5.66987e-06	4.61963e-05	5.22717e-06	6.68431e-07	1.355e-05	8.02821e-05	3.33915e-05	0.00255532
Catenibacterium_OTU_27	0	2.78149e-06	0	5.66987e-06	2.14777e-06	0	4.35339e-06	0.00291948	6.47648e-07	1.43022e-06	0.000336665
Dialister_pneumosintes	0.000698129	4.27904e-05	0.000103113	5.53085e-06	0	1.15776e-06	1.01666e-06	0	0.000131878	3.27047e-05	0.00116141
Peptococcus_OTU_19	6.95046e-05	3.91336e-07	0	5.53085e-06	5.58404e-07	0	2.16774e-06	0	1.83914e-05	3.64701e-06	0.000419756
Anaerococcus_OTU_42	6.41718e-05	3.48849e-07	0	5.53085e-06	1.08008e-05	8.73008e-06	1.03327e-06	0	1.36126e-05	8.70493e-05	0.000782718
Lachnospiraceae_G-7_bacterium_HMT_086	4.7811e-05	5.75309e-07	4.63018e-06	5.53085e-06	8.20281e-05	0	0	0	0.000111858	0.000384384	0.000280596
Desulfovibrio_D168	0	1.02684e-06	0	5.53085e-06	0	1.1051e-06	0	0	0	1.79305e-06	0.00035801
Porphyromonas_OTU_15	4.03805e-06	0	0	5.52397e-06	3.53537e-06	8.67008e-05	4.16219e-05	5.18071e-06	4.71223e-06	5.87469e-06	0.000175929
Mogibacteriaceae_OTU_334_BT	0.000232329	7.70194e-07	0	5.24929e-06	7.71765e-06	0	1.98402e-06	0.00126135	8.35856e-07	2.10386e-06	0.00107227
Corynebacterium_OTU_484	0.000173756	0	0	5.24929e-06	0.0022136	0.00017526	3.76566e-06	1.94134e-06	2.509e-05	0.00026462	0.00190221
Anaerococcus_lactolyticus	0.000153381	4.6376e-06	4.90305e-06	5.24929e-06	0	8.59362e-06	2.59613e-06	0	0.00010446	0.000276935	0.0013268
Peptostreptococcaceae_OTU_84	5.06676e-05	5.5287e-06	1.20882e-06	5.24929e-06	0	0	0	0	1.60713e-05	2.3826e-05	0.000869263
Mogibacterium_diversum	2.21943e-05	1.82143e-06	3.4802e-06	5.24929e-06	0	7.28176e-06	0	0	0.000275703	0	2.83272e-06
CandidatusKoribacter_OTU_9	1.01277e-05	1.44972e-06	1.45243e-06	5.24929e-06	1.16813e-06	2.68655e-06	4.51025e-07	0	1.32949e-06	2.45512e-05	0.000562707
Prevotella_OTU_411_BT	3.70494e-06	3.91336e-07	3.45831e-06	5.24929e-06	0	6.18824e-07	4.13666e-06	0	4.44091e-06	0.000130572	0.000397081
Tissierellaceae_WAL_1855D_OTU_17_BT	0.000290099	1.89431e-06	8.13603e-06	5.18393e-06	2.06484e-07	0	0.000131678	4.25182e-07	7.26652e-06	3.15194e-05	0.000565371
Peptoniphilus_OTU_69	0.000346328	4.77398e-06	0.000107296	4.75054e-06	3.96257e-06	1.61474e-06	2.2281e-07	0	1.22181e-06	5.5291e-06	0.00130783
Corynebacterium_jeikeium	0.000116188	2.01962e-06	1.34836e-06	4.61772e-06	0	2.91025e-05	0	0	2.66587e-06	0.000160504	0.00233291
Bacteroides_OTU_338	2.58458e-05	2.53855e-06	0	4.61557e-06	7.76095e-05	7.81204e-05	0.000166613	8.28989e-05	1.54514e-06	0	5.12099e-05
Bacteroides_OTU_662	1.5103e-05	2.14072e-06	0	4.61557e-06	7.31168e-05	4.31332e-05	0.000106874	6.52717e-05	1.34606e-06	0	4.27168e-05
Haemophilus_parainfluenzae	9.52481e-05	0.00805983	0.000373488	4.55044e-06	1.63367e-05	0	3.11963e-06	0	0.000239539	1.79553e-06	4.6141e-05
Streptococcus_OTU_469	0.000282256	6.04778e-05	0.000503812	4.51414e-06	1.29851e-05	0	0	0	0.000171453	3.68428e-06	9.26047e-07
Bacteroides_OTU_1115	0.000356403	0.000492661	5.80034e-07	4.36964e-06	0.0103785	0.00838015	0.004427	0.00819523	3.00205e-05	1.99728e-06	0.00181869
Blautia_OTU_174	9.22646e-05	1.47198e-05	0	4.36964e-06	1.13219e-06	0	1.72212e-06	6.38579e-07	0	2.32531e-06	0.000219161
Tissierellaceae_OTU_100	4.16884e-05	0	0	4.36964e-06	4.56425e-06	0	0	0	6.66131e-06	1.66824e-05	0.000639298
Corynebacterium_coyleae	2.05143e-06	0	5.80034e-07	4.36964e-06	0.00104486	7.21475e-06	3.52268e-05	8.01147e-06	0.000120247	0.000195755	0.000736023
Anaerococcus_OTU_323	3.57402e-06	2.61927e-07	3.55872e-07	4.34737e-06	5.87351e-06	0	0	0	2.71455e-05	0.000343184	0.000446966
Peptoniphilus_harei	0.000516787	2.92762e-05	3.45817e-06	4.25734e-06	3.11307e-05	0	2.28935e-06	2.9298e-07	1.32999e-05	0.000222193	0.00505257
Parabacteroides_OTU_171_BT	8.83082e-05	4.71119e-05	9.57108e-05	3.92662e-06	0.00291223	0	4.91155e-07	5.26218e-07	0.00127447	5.37626e-06	5.67045e-05
Anaerococcus_prevotii	0.000410889	7.07759e-07	3.79948e-06	3.73116e-06	7.79815e-06	0.000669974	0	3.42674e-06	6.0617e-06	0.000259029	0.00189051
Parvimonas_micra	0.000971044	0.000135621	0.000131986	3.72868e-06	0	0	0	4.64001e-07	0.000903257	9.16083e-07	4.82894e-06
Peptoniphilus_OTU_101	0.000354622	7.89168e-07	0	3.72581e-06	1.64241e-06	0	2.69384e-06	0	6.22355e-06	6.25533e-06	0.00169209
Prevotella_OTU_1264	9.60513e-05	6.67472e-07	1.48305e-06	3.72581e-06	6.09537e-06	0	5.51077e-06	0	0.000134233	0.000109093	0.000921674
Blautia_OTU_104	9.36213e-05	7.7024e-05	1.34836e-06	3.72581e-06	0	0	4.4775e-06	0.000849813	6.18043e-07	2.9286e-06	0.000338208
Peptoniphilus_OTU_57	3.8149e-05	0	0	3.72581e-06	2.4806e-06	0	3.37302e-06	0	1.28899e-05	2.46683e-05	0.000572549
Bacteroidales_OTU_1704_BT	4.6976e-06	7.62928e-05	5.36543e-06	3.72581e-06	0	0	0	0	0.000249075	4.1302e-07	2.18579e-07
Anaerococcus_OTU_467	0.000129695	2.51612e-06	0	3.68723e-06	0	4.80079e-06	7.76436e-07	0	9.44831e-06	1.26514e-06	0.000982277
Blautia_OTU_139	3.47253e-05	0	0	3.68723e-06	0	0	2.28773e-06	0.000298583	4.59145e-06	1.15495e-07	0.000137749
Peptococcus_OTU_7	2.70084e-05	7.95664e-07	0	3.68723e-06	1.2634e-07	0	0	1.17563e-06	4.23287e-08	1.22239e-05	0.000160433
Terriglobus_OTU_8_BT	1.23942e-05	8.13632e-05	5.52572e-07	3.68723e-06	3.65266e-07	0	0	0	7.25821e-07	2.34151e-07	0.000611521
Ruminococcus_bromii	1.10023e-05	0.000259386	1.79592e-06	3.68723e-06	2.26438e-06	0	1.37769e-06	0.000132704	3.9096e-05	8.41309e-06	0.00106399
Prevotella_OTU_515_BT	1.03834e-06	0	0	3.62385e-06	1.5642e-06	0	0	1.94134e-06	1.62193e-05	0.000117484	0.000130592
Abiotrophia_OTU_2_BT	1.59337e-05	7.89351e-06	0	3.53871e-06	0	0	4.49422e-07	0	9.78701e-05	2.96645e-06	2.42946e-07
Streptococcus_salivarius	3.70199e-05	0.00396121	0.000595884	3.46622e-06	0.00767573	0.025153	1.16998e-05	4.94876e-05	0.00585943	0.000277465	0.000186533
Streptococcus_oralis_subsp._oralis	0.00045467	0.00162514	0.00301971	3.37261e-06	2.87943e-05	0	1.72649e-07	0	0.00574713	2.37289e-05	2.06229e-06
Moryella_indoligenes	0.000490181	3.39699e-06	4.89901e-06	3.35758e-06	4.08458e-06	0	0	0	7.86739e-05	3.23683e-05	0.00216668
Actinomyces_sp._HMT_448	7.66161e-06	6.86936e-05	2.49414e-05	3.30506e-06	0	0	0	0	0.000259683	4.97539e-08	7.239e-07
Atopobium_OTU_4	0.000436775	0.000184399	0	3.2126e-06	2.77947e-06	0	0	0	6.68047e-06	0.00017197	0.000710172
Proteus_mirabilis	0.0165574	0.000453212	2.41532e-06	3.06809e-06	2.82642e-05	6.74896e-06	0.00540485	0.00305609	0.000234189	6.50104e-06	6.66115e-06
Anaerococcus_OTU_505	7.11042e-05	0	0	3.06809e-06	0	0	0	0	1.80805e-06	3.15444e-06	0.000104519
Fastidiosipila_sanguinis	0	0	0	3.06809e-06	3.23863e-06	0	9.24832e-07	0	1.16618e-05	0.00011239	0.000104774
Actinomyces_sp._HMT_169_BT	0.000108169	3.49669e-05	0.000202432	3.02151e-06	6.14502e-06	0	0	0	0.000570956	1.96512e-05	1.30697e-07
Actinomyces_oris_BT	2.70078e-05	4.99746e-05	5.80034e-07	3.02151e-06	1.24475e-06	0	0	0	0.000219449	1.55482e-07	0
Anaerococcus_OTU_2	0.00138604	0	0	2.90693e-06	0	0	0	0	2.57564e-07	5.96908e-05	0.000241696
Sutterella_OTU_63	5.6643e-05	0	0	2.90693e-06	0.000125052	0.000609265	1.64796e-05	0.006241	3.71914e-05	0.000105772	0.000411933
Leptotrichia_shahii	2.73005e-05	3.86291e-06	0	2.90693e-06	0	0	0	0	0.000175182	4.35923e-07	3.45448e-07
Varibaculum_OTU_13	8.31538e-05	2.78482e-06	3.45817e-06	2.83493e-06	0	0	0	0	9.25985e-06	9.82129e-08	0.000549373
Selenomonas_OTU_28	3.48921e-05	3.38505e-06	0	2.64382e-06	0	0	6.17635e-07	0	0.000136381	2.34924e-07	1.62027e-07
Anaerococcus_OTU_478	0.000547668	0	6.91635e-06	2.45839e-06	0	0	0	0	8.4268e-07	1.50801e-06	0.000951902
Haemophilus_OTU_74	1.39119e-05	5.72091e-05	0.000815039	2.26613e-06	0	0	0	0	0.000370213	5.23956e-06	1.59903e-06
Leptotrichia_hofstadii	9.36147e-06	1.8619e-05	0	2.26613e-06	2.47394e-06	4.75476e-06	0	0	0.000156402	2.92318e-07	9.07413e-08
Dialister_OTU_85	9.32938e-05	2.17329e-06	3.55872e-07	2.14929e-06	1.12815e-06	2.8176e-06	0	4.64001e-07	5.69356e-06	2.12465e-05	0.00031578
Granulicatella_adiacens	0.000635947	0.000310826	5.16071e-06	1.97022e-06	2.86272e-05	4.43328e-07	3.36485e-07	5.26218e-07	0.00187663	1.73081e-05	1.8069e-05
Streptococcus_OTU_367	0.000118141	3.35547e-05	0.000173396	1.88844e-06	4.69615e-06	0	0	0	0.000111149	1.30777e-06	4.2838e-06
Leptotrichia_OTU_46	0.00368791	3.48647e-05	1.34836e-06	1.84362e-06	0.000393384	0.000369254	0.00141066	0.000855663	0.000371181	9.43703e-06	0.00472749
Actinomyces_OTU_177	0.00237416	2.27318e-05	1.52765e-06	1.84362e-06	4.10674e-06	0	0	0	1.90395e-05	3.84666e-05	0.000402279
Lawsonella_clevelandensis	0.000553048	2.00541e-05	1.34836e-06	1.84362e-06	1.58601e-05	3.35151e-06	2.45363e-06	1.77073e-06	0.000205748	0.000664763	0.00525201
Peptoniphilus_OTU_70	0.000540207	7.4253e-05	1.10655e-05	1.84362e-06	3.53751e-06	0	6.65845e-07	3.20447e-06	1.25627e-05	2.07292e-05	0.00235235
Ruminococcaceae_OTU_3701	0.000328169	2.49168e-05	0	1.84362e-06	7.0047e-07	0	2.72136e-06	0	1.20593e-06	8.06679e-07	0.000838305
Dialister_OTU_103	0.000160935	7.57725e-06	3.55872e-07	1.84362e-06	1.2634e-07	0	3.44423e-07	0	2.2683e-06	3.72781e-05	0.00112263
Actinomyces_OTU_87	0.0001381	1.73845e-07	0	1.84362e-06	0	0.00101598	3.21422e-07	3.88268e-06	8.82432e-06	0.000350742	0.00100743
Tissierellaceae_1_68_OTU_17	6.13841e-06	1.67276e-07	6.76412e-07	1.84362e-06	8.88548e-06	3.77556e-06	0	1.74116e-06	5.47501e-05	0.000644891	0.0021589
Varibaculum_OTU_15	2.52251e-06	0	0	1.84362e-06	1.54642e-05	0	0	0	1.30389e-05	1.51074e-06	0.000346153
Enterobacteriaceae_OTU_262_BT	3.06784e-07	1.09915e-06	0	1.84362e-06	2.79285e-05	7.07415e-05	0.00028361	0.000229231	4.20592e-06	0	8.90357e-07
Porphyromonas_OTU_49_BT	0	0	0	1.84362e-06	0	0	9.24832e-07	0	0	9.18909e-08	0.000140387
Bacteroides_uniformis	0.000432413	5.91952e-05	3.0047e-06	1.52839e-06	5.70119e-06	0	0.000203294	0	5.29523e-06	2.31567e-05	0.00178552
Actinomyces_sp._HMT_172_BT	1.41746e-05	1.88935e-05	7.54044e-06	1.51075e-06	0	0	0	0	8.65911e-05	2.67668e-06	2.525e-06
Streptococcus_sanguinis	9.95022e-06	3.15842e-05	3.15016e-05	1.51075e-06	1.51392e-06	0	0	2.29797e-07	0.000212229	0	1.21473e-07
Sutterella_OTU_121	0	1.00445e-05	0	1.40329e-06	1.51392e-06	0	0.00686828	2.9298e-07	7.4704e-06	4.9885e-06	0.00155943
Prevotella_OTU_848	0.000410565	6.18362e-06	1.56469e-06	1.27443e-06	3.02649e-06	2.25067e-05	0	3.20447e-06	2.02047e-05	4.53372e-05	0.00274501
Megasphaera_sp._HMT_841_BT	0	2.65596e-06	0	1.22271e-06	4.97963e-06	1.53576e-06	3.14876e-07	3.20447e-06	3.78594e-05	0.000700466	0.00013488
Actinomyces_oris	5.87629e-05	0.000124975	1.20122e-06	1.13307e-06	1.24475e-06	0	1.98944e-06	0	0.000343265	5.93118e-07	2.06257e-07
Actinomyces_OTU_128_BT	6.89995e-06	9.60113e-06	0	1.13307e-06	1.24475e-06	0	0	0	6.88803e-05	1.82773e-06	2.00946e-06
Acidovorax_temperans	0.00742978	4.68406e-05	0.000151682	9.23114e-07	2.46737e-05	7.34738e-05	0.000706276	0	0.000199689	2.14927e-05	2.02705e-05
Anaerococcus_OTU_487	0.00113507	3.77621e-06	1.72134e-06	9.23114e-07	6.98814e-06	0	5.8552e-06	5.26218e-07	0.000139186	8.91007e-06	0.0016716
Dialister_OTU_114	0.000119179	4.27877e-05	0	9.23114e-07	5.58404e-07	0	6.88847e-07	6.28111e-05	5.2326e-06	1.69008e-05	0.000843882
Bacteroides_OTU_189_BT	8.05378e-06	2.17307e-06	0	9.23114e-07	3.28898e-05	3.69891e-05	0.000543532	0.000544931	8.70579e-06	2.21626e-07	0.000249647
Prevotella_OTU_606_BT	0	0	0	9.23114e-07	2.59125e-07	0	0	0	1.28665e-07	1.58362e-05	0.000229814
Tissierellaceae_1_68_OTU_6	0.00389304	2.52683e-06	4.66699e-06	8.94891e-07	5.19562e-06	4.20832e-06	8.48219e-07	1.32202e-07	1.57909e-05	0.000150367	0.00326812
Actinomyces_OTU_136	0.000345034	5.43765e-05	0	8.21758e-07	1.08163e-06	0	0	0	0.000323147	9.30393e-08	0
Prevotella_sp._HMT_304	2.51632e-05	2.24681e-05	0	7.69446e-07	1.94364e-07	0	0	2.29797e-07	0.00033111	4.6083e-07	6.60866e-08
Lachnospiraceae_OTU_1259	0.000321754	7.94804e-06	0	7.56983e-07	1.00249e-06	0	0	0	1.46535e-07	3.18818e-07	0.000527004
Corynebacterium_OTU_424	0.000251454	7.57923e-06	5.80034e-07	7.56983e-07	3.08067e-05	4.62112e-06	1.84272e-06	3.70441e-06	7.0317e-05	0.00149795	0.00636107
Anaerococcus_OTU_310	9.5921e-05	4.57507e-05	0	7.56983e-07	0	0	3.21422e-07	0	1.12414e-05	3.77262e-06	0.00073414
Lawsonella_clevelandensis_BT	1.627e-06	3.97832e-07	0	7.56983e-07	6.06744e-07	0	0	0	5.48701e-07	1.18213e-05	0.000125587
Ruminococcus_OTU_1047	1.0819e-06	8.86298e-05	0	7.56983e-07	1.77248e-07	0	4.09864e-05	2.55199e-06	1.282e-05	6.78001e-06	0.000796843
Saccharibacteria_(TM7)_G-1_bacterium_HMT_352	0.000103977	2.99437e-05	4.80486e-06	7.55377e-07	0	0	0	4.45474e-06	0.000211271	1.19182e-06	2.44362e-06
Desulfovibrio_OTU_47_BT	1.45221e-05	2.44501e-05	4.95086e-05	7.55377e-07	0	0	0	0	0.000186189	4.05842e-07	1.33575e-06
Porphyromonas_sp._HMT_275_BT	1.15556e-05	3.34179e-05	7.32742e-05	7.55377e-07	1.37486e-06	0	0	0	0.000136458	4.87668e-08	7.89671e-06
Actinomycetales_OTU_192_BT	0.000440386	0.000303705	0.00024471	6.63073e-07	0.000257599	0	3.23402e-06	4.45474e-06	0.0039256	2.77765e-05	6.25821e-06
Corynebacterium_OTU_112	2.17367e-05	2.7406e-07	0	6.2156e-07	0.000515444	0	0	0	1.04489e-05	0.000316546	0.000817897
Prevotella_salivae	9.18079e-05	0.000117794	5.92378e-06	6.13774e-07	5.18549e-06	0	0	4.45474e-06	0.000818088	9.42717e-06	3.61192e-06
Bacteroides_OTU_600	2.58514e-05	0.000194685	1.06762e-06	6.11355e-07	0.00185841	0.00170902	0.00257391	0.00215817	2.87888e-05	7.08911e-07	0.000782022
Peptoniphilus_harei_BT	1.86557e-05	1.05759e-06	0	6.11355e-07	2.52679e-07	3.00387e-06	0	0	5.11694e-06	4.64513e-05	0.000352461
Streptococcus_mutans	2.78533e-05	0.000173619	0	5.89643e-07	1.88502e-07	0	8.21929e-07	0	0.00158422	3.86006e-06	3.09478e-06
Campylobacter_concisus	0.000289365	0.000122058	8.17317e-05	3.98132e-07	1.40053e-05	0	3.80993e-06	1.33642e-05	0.00147263	4.99267e-06	1.74243e-05
Enterobacteriaceae_OTU_552_BT	5.45002e-05	8.58683e-05	0	3.98132e-07	3.73425e-06	0	1.91177e-06	3.11697e-06	0.000496126	7.41058e-06	9.6758e-07
Campylobacter_gracilis	4.30776e-05	5.92342e-05	0	3.98132e-07	1.13219e-06	9.22559e-06	0	0	0.000898444	6.7091e-06	0.000743099
Streptococcus_agalactiae	4.1167e-06	3.49845e-06	5.01862e-06	3.98132e-07	0.00129024	2.13356e-05	0.0083819	1.21743e-05	2.3851e-06	0.000125951	0.00106466
Mogibacterium_OTU_129	0.00105992	4.20836e-06	3.55872e-07	3.77689e-07	9.6018e-06	0	5.33231e-07	0	0.000198607	6.20155e-06	0.00246513
Capnocytophaga_gingivalis	0.000541386	1.74172e-05	0	3.77689e-07	0	0	4.49422e-07	0	0.000259589	2.31683e-07	7.07787e-07
Peptoniphilus_indolicus_BT	7.16763e-06	1.22593e-06	3.89436e-07	3.77689e-07	2.52679e-07	0	3.23402e-06	7.14574e-07	4.23779e-06	7.21424e-05	0.00025416
Dialister_OTU_85_BT	1.85068e-05	2.56219e-07	4.06802e-06	3.05677e-07	2.03713e-06	0	5.67234e-07	6.38579e-07	1.28832e-06	1.66636e-05	0.000221377
Chitinophagaceae_OTU_325_BT	6.93853e-06	0.000213282	3.89436e-07	3.05677e-07	2.88648e-05	6.18824e-07	3.57392e-05	5.75395e-05	2.70717e-05	1.37949e-06	0.00184598
Treponema_OTU_719	0	2.1702e-06	3.14286e-05	3.05677e-07	0	6.18824e-07	0	0	2.59631e-06	0.00040748	0.00127103
Porphyromonas_OTU_133	0.0034784	2.82492e-06	6.98368e-07	0	1.67156e-05	9.57965e-07	0	0	2.18558e-05	5.67511e-05	0.00303177
Tissierellaceae_WAL_1855D_OTU_8	0.0022274	0	0.000211537	0	1.72133e-05	0	0	0	7.04505e-05	2.94818e-05	0.000951667
Peptostreptococcus_anaerobius	0.0022065	2.2022e-06	3.89436e-07	0	8.9582e-05	1.1051e-06	0.0004747	0	5.3485e-05	0.000104814	0.00154486
Lachnospiraceae_OTU_3692	0.00210175	3.06822e-06	5.80034e-07	0	0.00745276	0.00503442	4.24524e-05	0	6.6785e-05	0.00102814	0.00683587
Mogibacteriaceae_OTU_330	0.00181682	1.62537e-07	0	0	7.18888e-07	6.18824e-07	0	0	1.38004e-06	1.64007e-05	0.000752876
Tissierellaceae_1_68_OTU_16	0.00177035	3.23639e-06	1.34836e-06	0	3.63273e-05	0	1.68245e-07	0	2.87609e-05	6.99531e-05	0.00223791
Fusobacterium_gonidiaformans	0.00162678	1.9529e-06	1.55774e-06	0	5.58404e-07	0	1.85205e-07	2.59056e-05	4.84613e-05	4.24496e-05	0.00101221
Anaerococcus_OTU_128	0.00153409	1.03905e-06	0.000440536	0	1.32329e-06	0	0	0	0.000236201	0.000398111	0.000346018
Porphyromonas_asaccharolytica	0.00152084	2.30739e-05	4.20285e-05	0	3.15849e-06	0	9.29943e-06	6.38579e-07	3.31293e-05	5.65583e-06	0.00109658
Mogibacteriaceae_OTU_12	0.00146076	1.32198e-06	6.91635e-06	0	3.28483e-06	0	6.19962e-06	4.8719e-07	2.89255e-05	1.83232e-06	0.0015285
Peptoniphilus_OTU_71	0.000975114	0	7.2516e-07	0	1.58912e-06	0	7.76436e-07	0	7.54988e-06	3.83163e-06	0.00246028
Peptoniphilus_OTU_51	0.000936237	1.83054e-06	0	0	0	0	1.68245e-07	0	1.65171e-05	1.631e-05	0.000668518
Bifidobacterium_OTU_42	0.000826734	1.1935e-06	0	0	1.54817e-06	0	0.000486273	0.00438011	1.14414e-06	8.5929e-07	0.000488459
Anaerococcus_OTU_20	0.000587822	1.00938e-05	0	0	1.98561e-05	0.000473357	2.30584e-07	0	2.04566e-05	9.33744e-06	0.000742824
Anaerococcus_sp._HMT_294	0.000545599	3.28232e-05	5.47677e-05	0	3.16052e-06	2.36433e-06	1.18211e-05	1.32202e-07	2.02566e-06	7.05088e-05	0.0054236
Anaerococcus_OTU_517	0.00051467	1.04785e-06	0	0	0	0	8.79237e-07	0	6.80904e-07	1.52511e-07	0.000775561
Intrasporangiaceae_OTU_58	0.000441506	3.27734e-05	0	0	2.97194e-06	0	0.000288231	0.00242531	6.00307e-06	1.58029e-05	0.00121642
Anaerococcus_OTU_503	0.000428739	1.49683e-07	4.26443e-06	0	8.80863e-06	0	0	0	2.2103e-05	4.82443e-06	0.000985445
Lachnospiraceae_OTU_97	0.00042169	0	0	0	0.000715505	0	4.13308e-06	0	4.20001e-07	2.48151e-07	0.000233061
Dialister_OTU_79	0.000398902	6.52377e-05	4.40365e-06	0	1.2634e-06	4.20832e-06	2.04394e-06	0.000504733	2.40773e-05	4.22672e-05	0.00317764
Prevotella_OTU_929	0.000396526	0	0.000115666	0	1.24828e-06	9.57965e-07	0	0.00163327	3.94229e-05	1.0483e-06	0.00130892
Haemophilus_sp._HMT_908	0.000384256	0.000115118	0.000268916	0	0	6.18824e-07	1.54002e-06	0	0.00206519	8.02841e-08	3.92467e-07
Dialister_OTU_39	0.000372344	0.000260407	5.52572e-07	0	2.24362e-06	0	8.14293e-06	0	4.24697e-06	8.1137e-06	0.00111012
Anaerococcus_OTU_497	0.000370896	0	0	0	1.15308e-06	0	0	0	9.42191e-08	6.55852e-07	0.00024017
Peptoniphilus_sp._HMT_375	0.000368285	7.32176e-06	3.55872e-07	0	7.58037e-07	0	2.2281e-07	0	3.13155e-05	0.000123581	0.00140456
Atopobium_minutum	0.000353379	1.35622e-06	0	0	0	0	0	0	6.07425e-06	4.06916e-05	0.000568187
Pyramidobacter_OTU_5	0.000349882	1.47968e-07	0	0	2.52679e-07	9.57965e-07	0.000267598	0	5.37818e-05	2.07436e-05	0.00057875
Porphyromonas_OTU_27	0.000344655	7.78326e-07	0.0001346	0	1.03464e-05	0	4.13e-06	0	8.75156e-05	8.94767e-06	0.00145629
Ruminococcaceae_G-3_bacterium_HMT_366	0.000342086	1.3739e-06	3.55872e-07	0	2.02143e-05	5.33501e-06	7.76436e-07	0	2.77862e-05	6.27432e-05	0.00273097
Oscillospira_OTU_1117	0.000339815	1.59133e-06	0	0	0	0	2.06654e-06	0	2.76492e-05	1.68443e-06	0.000230468
Haemophilus_OTU_58	0.000311518	0.00179412	0.0289719	0	1.18231e-06	0	0	7.14574e-07	0.000491003	7.82396e-06	3.94114e-07
Lachnospiraceae_OTU_731_BT	0.000304799	2.77139e-05	5.85262e-07	0	5.39308e-07	0	4.31829e-06	0	7.73633e-05	1.90258e-06	0.00168788
Clostridiales_OTU_2707	0.000284067	8.02115e-07	5.80034e-07	0	0	0	2.2281e-07	0	3.79497e-05	1.18613e-05	0.00146551
Gallicola_OTU_16	0.000272903	1.1935e-05	4.36662e-06	0	0	4.78526e-07	0	0	5.62471e-06	4.33626e-06	0.000754686
Mogibacteriaceae_OTU_228	0.00023582	0	0	0	0	0	0	0	6.08809e-07	3.58312e-07	0.000488749
Anaerococcus_OTU_80	0.000230368	1.03628e-05	4.0776e-06	0	3.08029e-06	0.000117762	0	1.46157e-06	1.48661e-05	0.000444899	0.00361595
Anaerococcus_OTU_253	0.000227675	5.17559e-07	0	0	1.2634e-07	0	0	0	0	5.96267e-07	0.000429595
Actinomyces_OTU_78_BT	0.000218492	0.000225108	2.33582e-06	0	0.000756993	0	4.36014e-07	5.26218e-07	0.000952196	4.20665e-06	6.60289e-06
Oscillospira_OTU_699	0.000216242	0.000100557	5.80034e-07	0	4.52875e-06	0	6.42843e-07	0.000433838	4.11238e-07	4.83863e-06	0.000666864
Bilophila_OTU_3	0.000211758	0	0	0	2.13842e-06	0	4.82193e-06	0	0.000150702	3.21276e-07	0.000386573
Prevotella_dentalis	0.00020665	3.34906e-05	0.000105768	0	4.67336e-06	0	0	0	0.000304187	1.62529e-06	1.42391e-06
Oscillospira_OTU_976	0.00020535	3.82509e-06	0	0	0	1.7824e-05	6.85799e-06	0	9.06125e-07	1.18391e-05	0.0010002
Bacteroides_OTU_532	0.000204243	4.94525e-06	0	0	0.000341661	1.85647e-06	0.000525953	0.00101527	3.55322e-06	1.00266e-06	0.000221021
Lachnospiraceae_OTU_1844	0.000202708	0	0	0	0.00011399	0	0	0	2.05748e-07	4.87384e-07	0.000519279
Arcanobacterium_OTU_5	0.000195892	0	1.45243e-06	0	0	0	0	0	2.74708e-05	1.35085e-05	0.000387749
Succiniclasticum_OTU_18	0.000186918	6.87071e-07	9.35644e-05	0	8.82468e-06	0	3.86155e-05	8.63452e-07	1.54366e-05	3.98294e-06	0.000912312
Clostridium_OTU_719	0.000183932	3.11113e-07	0	0	0	0	3.44423e-07	0	3.57744e-05	3.86923e-07	0.000109808
Clostridiales_OTU_4030_BT	0.000179836	7.19466e-07	0	0	4.29554e-06	0	0	0	5.77163e-07	5.41502e-06	0.000305172
Actinomyces_OTU_69	0.000168608	3.11791e-05	0	0	0	2.36433e-06	0	0	0.00049213	0	9.11471e-07
Oscillospira_OTU_469	0.0001629	3.11113e-07	5.80034e-07	0	0	0	4.4775e-06	0	5.25001e-07	7.93612e-07	9.9765e-05
Peptoniphilus_OTU_97	0.000160949	3.91336e-07	3.89436e-07	0	6.09546e-06	0	2.82467e-06	6.38579e-07	2.68368e-05	4.20985e-05	0.000893483
Megasphaera_OTU_79	0.000154328	0	2.73646e-06	0	7.36583e-07	0	0	0	2.54052e-06	2.88621e-06	0.000620853
Peptoniphilus_OTU_76	0.000146697	0	0	0	9.06044e-06	0	1.72649e-07	0	6.47353e-07	2.89701e-06	0.000412853
Actinomyces_OTU_69_BT	0.00014542	8.01467e-05	2.90017e-06	0	1.24475e-06	1.62449e-06	0	0	0.000518775	4.86331e-07	4.41115e-07
Dialister_OTU_16	0.000144713	7.82672e-07	0	0	4.33866e-06	0	5.67234e-07	0	2.2664e-05	1.85433e-05	0.000575331
Peptoniphilus_sp._HMT_187	0.000142503	1.11393e-05	1.22041e-05	0	0	0	4.35339e-06	0	1.33599e-05	0.000209321	0.00128534
Facklamia_OTU_73	0.000139241	1.9847e-06	0	0	1.35821e-05	0	3.30922e-06	0	1.9275e-05	0.000150239	0.000747091
Mycoplasma_faucium	0.000138947	3.7612e-06	5.33853e-06	0	1.55779e-06	2.36433e-06	0	0	0.000201411	1.34605e-07	2.05734e-06
Clostridiales_OTU_1391_BT	0.000138505	4.63461e-05	0	0	6.8841e-06	0	8.10564e-05	0.000520231	2.03966e-05	1.89818e-05	0.000646305
Clostridium_hiranonis	0.000137533	0.000198797	0	0	5.81162e-06	0	6.54405e-06	2.57953e-07	3.24222e-07	2.08499e-06	0.000527752
Lachnospira_OTU_174	0.000131541	0	0	0	2.06484e-07	0	0	0	7.3806e-07	2.17488e-07	0.000203288
Dialister_OTU_88	0.000130642	4.51742e-06	0	0	0	0	0	0	2.10109e-06	4.51588e-05	0.000424439
Mogibacteriaceae_OTU_130	0.000127976	4.31428e-07	0	0	2.65313e-06	0	0	0	2.0303e-07	5.47645e-06	0.000718511
Anaerococcus_OTU_345	0.000127506	4.50667e-07	0	0	0	0	0	7.42698e-07	3.65444e-07	5.8449e-05	0.000357328
Anaerococcus_OTU_331	0.000122811	2.33375e-07	1.52765e-06	0	1.88171e-06	0	0	8.92393e-07	1.56291e-05	3.31027e-06	0.00085723
Bilophila_OTU_9	0.000122506	1.55025e-05	0	0	0	1.91593e-06	2.21189e-07	0	6.75098e-06	1.67713e-06	0.000354637
Bergeyella_sp._HMT_322	0.000119908	9.74366e-05	3.88171e-05	0	5.00592e-05	0	6.17635e-07	0	0.00131353	8.51394e-07	1.03356e-05
Porphyromonas_OTU_53	0.000110478	0	4.06802e-06	0	7.82818e-06	0	0	0	4.57979e-05	5.21867e-06	0.000634624
Clostridium_OTU_211	0.00010868	0	0	0	3.20938e-06	0	1.00759e-05	0	7.27988e-05	2.743e-06	0.000584012
Ruminococcaceae_OTU_3299	0.000105945	0	0	0	2.65313e-06	0	0	0	1.47492e-05	1.03765e-06	0.000632791
Peptoniphilus_OTU_83	0.000101778	0	0	0	1.46095e-05	7.67e-06	0	1.32202e-07	3.76982e-06	5.7386e-05	0.000402783
Oscillospira_OTU_230	9.76869e-05	0.000143532	0	0	2.52679e-07	0	8.58758e-06	0	1.10695e-06	2.30047e-06	0.000645817
Clostridiales_OTU_6039	9.74441e-05	5.56156e-06	2.94132e-06	0	6.64715e-07	4.32227e-06	1.45808e-06	4.68454e-06	0.00126836	1.9875e-06	2.19911e-06
Blautia_OTU_1202	9.37645e-05	2.82461e-05	0	0	2.03713e-06	0	2.41096e-06	0.000359831	6.4187e-06	1.64176e-06	0.000657608
Dialister_OTU_41	9.30836e-05	0	0	0	3.79019e-07	0	3.44423e-07	0.000205164	5.64113e-06	7.24534e-06	0.000825363
Parvimonas_OTU_6_BT	9.09894e-05	3.55312e-06	3.89436e-07	0	2.0234e-06	2.8176e-06	0	0	0.000319436	0.000209205	0.000224341
Porphyromonas_OTU_25	8.65243e-05	2.43844e-06	1.34836e-06	0	2.77207e-05	0	0	0	8.22287e-06	1.61714e-05	0.000975524
Capnocytophaga_leadbetteri	8.13503e-05	3.23853e-05	4.23658e-05	0	0	2.36433e-06	1.72649e-07	0	0.00023483	7.79952e-07	1.21581e-06
Leptotrichia_wadei	7.39235e-05	1.2465e-06	4.03304e-07	0	0	6.18824e-07	0	0	0.000236447	5.97094e-06	2.33866e-07
Dorea_OTU_69	7.03741e-05	1.03436e-05	2.41179e-06	0	4.34538e-06	0	4.35063e-06	0	3.83164e-06	1.87258e-06	0.00048268
Kingella_oralis	6.72084e-05	0.000157304	1.69941e-06	0	8.31557e-06	2.97067e-06	0	0	0.00178066	5.9506e-06	1.28809e-06
Clostridiales_OTU_4842	6.6739e-05	0	0	0	0	0	7.76436e-07	0	4.48472e-06	9.76764e-07	0.000256392
Oscillospira_OTU_831	6.42809e-05	0	0	0	2.06484e-07	0	7.76436e-07	2.29797e-07	2.75748e-07	5.9077e-08	0.000357653
Stomatobaculum_longum	5.97601e-05	0.000177986	0.000125287	0	2.4895e-06	0	6.17635e-07	0	0.000959827	6.16989e-07	1.61693e-06
Clostridiales_OTU_2861_BT	5.77528e-05	0	0	0	0	0	3.21422e-07	0	9.20273e-07	3.33772e-07	0.000186858
Streptococcus_constellatus	5.77314e-05	0.000225192	6.9604e-06	0	0	0	1.96599e-06	2.29797e-07	0.000327038	1.75457e-06	2.55638e-05
Cutibacterium_avidum	5.65835e-05	1.86793e-05	0	0	0.00152441	0	1.99059e-06	0.000150194	8.59627e-06	3.52852e-05	0.000286599
Coprococcus_OTU_166	5.41833e-05	4.09372e-05	0	0	2.06484e-07	0	1.1366e-05	0.000783461	8.58538e-05	5.89653e-06	0.000931146
Anaerococcus_OTU_421	5.2951e-05	0	0	0	5.48962e-05	1.69056e-05	0	2.22809e-06	2.16988e-07	1.63758e-06	0.00061284
Leptotrichia_sp._HMT_212	5.00951e-05	7.54106e-06	1.52765e-06	0	2.4895e-06	0	4.21744e-07	0	0.000486869	3.50329e-07	2.55176e-06
Porphyromonas_asaccharolytica_BT	4.99805e-05	0	2.03401e-05	0	9.64522e-07	0	0	0	1.53431e-05	2.46635e-06	0.000286618
Streptophyta_OTU_309_BT	4.97106e-05	2.50569e-05	3.55872e-07	0	2.77947e-06	0	1.03327e-05	3.20447e-06	2.0015e-05	2.91024e-06	0.00086264
Fusobacterium_sp._HMT_204	4.95444e-05	9.39672e-05	0.000185611	0	4.979e-06	0	0	0	0.000493096	0	5.3317e-07
Corynebacterium_OTU_267	4.88917e-05	7.89597e-05	0	0	0	0	1.06602e-07	0	0.000599017	0	0
Lachnoanaerobaculum_umeaense	4.7622e-05	3.55776e-05	0.000308958	0	0	0	0	0	0.000495119	3.61119e-07	9.82771e-07
Lachnospira_OTU_79	4.71272e-05	8.35447e-06	0	0	0	0	0	0	0	4.02406e-07	0.000164193
Mogibacterium_timidum	4.62584e-05	6.99944e-05	0	0	0	0	0	4.64001e-07	0.00016078	9.9982e-06	3.39671e-05
Blautia_OTU_502	4.61104e-05	1.86981e-05	0	0	0	0	1.03327e-06	0	2.0458e-06	5.58098e-07	0.000328625
Clostridiales_OTU_4560	4.58999e-05	0	0	0	1.00249e-06	0	7.76436e-07	0	0	2.1391e-07	0.000372193
Peptostreptococcus_stomatis	4.58999e-05	2.06025e-05	0	0	0	0	0	0	0.000277484	1.07685e-05	6.90573e-06
Blautia_OTU_220	4.4912e-05	1.57547e-05	5.52572e-07	0	0	0	1.03327e-06	7.91117e-05	3.90108e-06	4.72187e-07	0.000288305
Saccharibacteria_(TM7)_G-1_bacterium_HMT_952	4.08917e-05	7.34217e-05	0.00197646	0	0	0	0	0	0.000372923	1.40004e-05	5.18564e-07
Tissierellaceae_WAL_1855D_OTU_27	4.00567e-05	1.47968e-07	1.06762e-06	0	0	5.28023e-06	0	2.29797e-07	9.37542e-07	9.94596e-06	0.00195657
Corynebacterium_matruchotii	3.99575e-05	6.30883e-05	4.0776e-06	0	5.24817e-06	0	1.18956e-06	0	0.000799028	2.58864e-06	2.93046e-07
Oscillospira_OTU_975	3.89146e-05	1.48395e-05	0	0	0	0	3.78866e-06	0	1.23734e-07	4.30305e-07	0.000209839
Corynebacterium_OTU_767	3.79399e-05	1.22593e-06	0	0	0.000657138	1.71537e-05	0	0	7.09031e-08	0.00011351	0.000552498
Ruminococcaceae_OTU_502	3.72512e-05	5.56965e-06	0	0	0	0	0	0	0	0	0.000127961
Ruminococcaceae_OTU_1026	3.64662e-05	0	0	0	4.12969e-07	0	0	0.000150567	1.2414e-07	6.77848e-07	0.000959758
Leptotrichia_buccalis	3.58413e-05	2.42567e-05	9.39654e-05	0	0	0	0	0	0.000279706	3.86006e-06	2.26429e-06
Sutterella_OTU_51	3.56744e-05	1.44683e-05	0	0	2.26438e-06	0	4.69707e-05	0	1.28411e-06	1.02904e-06	0.00135918
Clostridiales_OTU_4841_BT	3.50037e-05	0.00010294	6.72681e-05	0	1.88502e-07	0	0	0	0.000302111	3.95979e-07	1.16551e-05
Oscillospira_OTU_675	3.49097e-05	0	0	0	0	0	0	0.000482326	0	1.73225e-07	0.000334561
Alloprevotella_sp._HMT_914	3.38223e-05	5.2143e-05	5.80034e-05	0	0	0	0	0	0.000309983	1.09281e-05	1.97948e-06
Aggregatibacter_sp._HMT_513	3.3668e-05	3.93109e-06	8.39161e-07	0	6.22375e-06	9.28898e-07	4.49422e-07	0	0.000313059	0	1.27708e-06
Ruminococcaceae_OTU_1840	3.30717e-05	2.76136e-07	0	0	2.26438e-06	0	0	0	3.02265e-07	2.00649e-06	0.000252961
Blautia_OTU_74	3.25508e-05	9.15014e-06	0	0	1.04179e-06	0	1.37769e-06	0	4.16906e-06	1.00706e-06	0.000343289
Sutterella_OTU_82	3.22449e-05	0.000323437	0	0	0.000144273	0	7.30479e-05	1.32202e-07	0.000569744	7.44614e-06	0.00197123
Gallicola_OTU_11	3.16725e-05	2.09246e-06	0	0	1.13706e-06	2.8176e-06	3.21422e-07	0	2.23272e-05	6.45778e-05	0.00020321
Catonella_morbi	3.10149e-05	3.33221e-05	0	0	0	0	0	0	0.000269666	4.19565e-06	6.95256e-07
ph2_OTU_15	3.06494e-05	0	0	0	0	0	0	0	0	1.25611e-06	8.10115e-05
Blautia_OTU_736	3.00423e-05	2.78482e-05	0	0	0	0	7.23289e-06	0	1.46225e-06	5.24325e-07	0.000842425
Streptococcus_sp._HMT_061	2.91071e-05	0.000518841	0	0	2.16453e-06	0	0	0	0.000328938	1.11116e-05	1.17821e-05
Coprococcus_OTU_16	2.89378e-05	0	0	0	0	0	1.37769e-06	0	4.23287e-08	4.50647e-07	7.81447e-05
Enterobacteriaceae_OTU_83_BT	2.88862e-05	1.63784e-06	8.5845e-05	0	0	0	0.000165738	4.06127e-06	0.000179409	4.11824e-06	5.84846e-05
Saccharibacteria_(TM7)_G-3_bacterium_HMT_351	2.84228e-05	8.30123e-06	0	0	0	0	4.49422e-07	1.33642e-05	0.000324262	1.93699e-06	9.14777e-07
Ruminococcus_OTU_1180	2.8211e-05	2.78327e-07	0	0	2.26438e-06	0	0	8.63452e-07	1.59039e-07	3.90888e-06	0.000712486
Peptoniphilus_OTU_55	2.69655e-05	0	4.06802e-06	0	0	0	0	0	1.55934e-07	1.46635e-06	0.000333421
Anaerococcus_OTU_418	2.62116e-05	3.58049e-06	4.48701e-07	0	1.3837e-05	0	1.03327e-06	0	7.96011e-06	0.000115395	0.000966382
Treponema_lecithinolyticum	2.57834e-05	3.86591e-06	1.93699e-07	0	0	0	0	0	0.000158449	8.74666e-08	1.50268e-06
Peptoniphilus_OTU_79_BT	2.55543e-05	3.97832e-07	9.81988e-06	0	2.52679e-07	0	0	0	3.26339e-06	6.01707e-05	0.000273532
Tannerella_sp._HMT_286	2.51166e-05	6.20917e-06	0	0	0	0	0	4.64001e-07	0.000555412	3.10696e-05	3.56155e-05
Pseudopropionibacterium_propionicum	2.35558e-05	7.34129e-05	0	0	1.24475e-06	0	0	4.45474e-06	0.000310777	1.43875e-05	4.80487e-07
Peptoniphilus_OTU_66	2.23234e-05	1.15023e-06	6.66692e-07	0	4.27844e-06	0	0	0	7.39433e-06	0.000244274	0.000787162
Blautia_OTU_847	2.20047e-05	0	0	0	0	0	3.78866e-06	0	4.89324e-07	5.27994e-07	0.000136463
Sutterella_OTU_40	2.20047e-05	1.20344e-06	4.03304e-07	0	1.13219e-06	0	6.88847e-07	0	4.23287e-08	4.20785e-07	0.000781969
Blautia_OTU_277	2.19903e-05	2.79036e-05	0	0	0	0	4.01147e-06	0.000176087	3.09022e-07	8.11165e-07	9.77252e-05
Bergeyella_sp._HMT_931	2.15995e-05	9.45248e-05	0.000324592	0	0.00023833	0	3.44423e-07	0	0.000702866	1.11742e-05	5.79203e-07
Lachnoanaerobaculum_saburreum	2.13606e-05	6.51867e-05	1.20122e-06	0	1.88502e-07	0	1.88169e-06	0	0.000217045	6.72825e-08	1.28013e-06
WAL_1855D_OTU_19_BT	2.13028e-05	1.89431e-06	8.13603e-06	0	8.11083e-07	0	0	0	0	1.31357e-06	0.000215933
Ruminococcaceae_OTU_4520	2.0581e-05	3.97832e-07	0	0	1.13219e-06	0	3.44423e-07	0	0	4.78082e-07	0.000332088
Capnocytophaga_granulosa	1.99462e-05	1.40851e-05	0	0	3.73425e-06	0	0	0	0.000275117	2.88418e-07	5.0851e-07
Anaerococcus_OTU_344	1.9843e-05	0	0	0	4.67201e-06	0	0	0	8.46573e-08	4.87608e-06	0.000272278
Odoribacter_OTU_56	1.95976e-05	0	0	0	1.04179e-06	0	1.69912e-06	0	8.03277e-08	1.27793e-06	0.000535963
Peptoniphilus_OTU_16	1.91931e-05	1.62537e-07	0	0	0	0	0	0	1.03565e-06	2.70405e-07	8.11742e-05
Campylobacter_showae	1.91696e-05	1.2284e-05	0	0	0	0	0	0	0.000105044	1.34645e-07	7.65292e-07
Anaerococcus_OTU_122	1.85618e-05	1.1805e-06	0	0	3.07893e-06	0	2.21189e-07	0	3.44094e-05	2.31526e-06	0.0011377
Dialister_OTU_101	1.81488e-05	0	2.03401e-05	0	0	0	6.88847e-07	0	2.66858e-06	2.67505e-06	9.8304e-05
Neisseria_elongata	1.81062e-05	2.5374e-05	9.76592e-06	0	5.83009e-07	0	6.17635e-07	0	0.000366775	3.11682e-07	2.6324e-06
Ruminococcaceae_G-1_bacterium_HMT_075	1.80251e-05	1.45465e-05	0	0	0	0	0	4.64001e-07	0.000385911	1.03712e-05	3.24944e-07
Blautia_OTU_67	1.77312e-05	1.36743e-05	0	0	0	0	1.60828e-06	0	1.8425e-07	3.32909e-07	8.18064e-05
Saccharibacteria_(TM7)_G-5_bacterium_HMT_356	1.7501e-05	5.90902e-05	3.30619e-05	0	0	0	0	4.45474e-06	0.000228201	5.1039e-06	4.13891e-05
Saccharibacteria_(TM7)_G-1_bacterium_HMT_349	1.74061e-05	1.10544e-05	0	0	1.88502e-07	1.53576e-06	6.17635e-07	2.29797e-07	0.000359977	0	9.13735e-07
Bacteroides_OTU_345_BT	1.72411e-05	2.70796e-05	5.62633e-05	0	1.09086e-06	1.23765e-06	6.94977e-06	6.68146e-06	0.0002479	8.42519e-05	8.35488e-05
Ruminococcus_OTU_446	1.68103e-05	0.000115553	0	0	5.78728e-06	0	1.85205e-07	0.000530814	6.84578e-07	9.01294e-08	0.00021986
Dorea_OTU_177	1.65035e-05	1.76607e-07	0	0	0	0	0	0	3.36184e-07	4.22129e-07	0.000239086
Prevotella_baroniae	1.63085e-05	1.22911e-05	0	0	1.6051e-06	0	0	0	0.000218669	7.49643e-07	4.84297e-07
Eikenella_corrodens	1.55676e-05	1.95563e-05	0	0	0	0	0	0	0.000106105	3.15823e-06	0
Coprococcus_OTU_78	1.49318e-05	8.35447e-06	0	0	6.29751e-06	0	0	0	5.18635e-06	7.661e-07	0.000133346
Rikenellaceae_OTU_228	1.48823e-05	4.95946e-05	0	0	3.43337e-06	0	0	0	0	1.2718e-06	0.000183407
Peptoniphilus_OTU_61	1.48169e-05	3.78863e-06	1.22041e-05	0	2.52679e-07	0	0	0	2.64298e-06	2.03554e-06	0.000168866
Leptotrichia_sp._HMT_392	1.44083e-05	0.000101458	0	0	0	0	0	0	0.000140504	0	1.499e-06
Bacteroides_OTU_1274	1.43327e-05	6.6977e-05	3.44503e-05	0	0.00499566	0	5.51851e-06	0.000452718	6.78791e-06	1.4807e-06	0.00288495
Ruminococcus_OTU_93	1.40555e-05	2.74504e-05	0	0	0	0	3.44423e-07	0	1.94432e-05	4.60983e-07	0.000168843
Lactobacillus_johnsonii	1.26505e-05	5.31017e-06	0	0	6.85043e-05	2.07947e-05	8.29132e-06	0	2.06588e-05	0.000340461	7.1391e-05
Oribacterium_sp._HMT_078	1.24452e-05	4.46988e-05	6.698e-05	0	0	2.36433e-06	0	0	0.000284153	1.23782e-07	1.11505e-06
Campylobacter_rectus	1.21333e-05	4.03815e-07	0	0	0	0	0	0	0.000273018	6.62575e-08	8.05026e-07
Prevotella_multiformis	1.14358e-05	0.000111905	0	0	1.55779e-06	0	2.37911e-06	0	5.56431e-05	2.83146e-06	1.02018e-06
Ruminococcus_OTU_29	1.12984e-05	5.71056e-05	1.45243e-06	0	6.31698e-07	0	1.63051e-06	0	9.85005e-06	2.76751e-06	0.000425038
Anaerococcus_OTU_472	1.11319e-05	7.95664e-07	5.80034e-07	0	0	1.12704e-05	0	0	6.84578e-07	5.34438e-05	0.000364074
Prevotella_OTU_429	1.07311e-05	0	0	0	0	0	0	0	5.91936e-07	2.34371e-06	7.77994e-05
Alloprevotella_rava	1.06167e-05	5.38921e-06	1.21812e-05	0	0	0	0	0	0.000109169	0	0
Prevotella_OTU_608_BT	1.04465e-05	2.70071e-06	1.07975e-06	0	0	6.18824e-07	0	0	1.05634e-06	5.33654e-05	0.000872493
Anaerococcus_octavius	1.02165e-05	3.22244e-05	0	0	2.12365e-05	0.000588878	0	1.17656e-05	1.84911e-05	9.56327e-06	0.00059875
Porphyromonas_pasteri_BT	1.00133e-05	0.000120707	5.80034e-07	0	8.71325e-06	0	0	0	0.000473801	2.1497e-06	3.84988e-05
Clostridiales_OTU_4841	9.99764e-06	0	0	0	1.64025e-06	0	0	0	6.62359e-07	5.55053e-06	0.000172399
Peptoniphilus_OTU_38	9.9172e-06	0	0	0	0	0	0	0	7.58629e-07	9.72044e-06	0.000226949
Coriobacteriaceae_OTU_161	9.78822e-06	1.58079e-05	0	0	0	0	2.26387e-07	0	0.000161557	1.48767e-06	2.25765e-06
Peptostreptococcaceae_XIG-9_brachy	9.41955e-06	1.2104e-05	0	0	2.03713e-06	0	0	4.64001e-07	0.000277495	3.52987e-07	2.83812e-07
Gemmatimonadetes_OTU_2_BT	9.10001e-06	1.54322e-06	0	0	0	0	1.55287e-05	0	0.000315654	6.32245e-07	1.93853e-07
Actinomyces_sp._HMT_170	8.98056e-06	2.76136e-07	0	0	1.24475e-06	0	0	0	0.000259753	1.05274e-06	2.4926e-07
Mobiluncus_mulieris_BT	8.76743e-06	0	9.62856e-05	0	7.09349e-07	1.1051e-06	0	0	6.59014e-06	2.15556e-05	0.000122677
Ruminococcaceae_OTU_2210	8.6447e-06	4.01058e-07	0	0	0	0	3.21422e-07	0	2.75215e-06	7.08826e-06	0.0011086
Rikenellaceae_OTU_50	8.34438e-06	3.08971e-05	1.93699e-07	0	3.57847e-06	0	1.58435e-05	8.92393e-07	0.000128548	6.32322e-07	0.000897289
Prevotella_oulorum	7.77342e-06	1.6513e-05	0	0	0	0	0	3.20447e-06	0.000457652	3.81774e-06	3.06117e-07
Gallicola_OTU_14	7.39738e-06	0	0	0	9.34913e-06	0	0	0	1.58511e-06	9.2707e-05	0.000484749
Peptoniphilus_OTU_11_BT	7.29595e-06	1.59133e-06	4.06802e-06	0	1.2634e-06	4.36848e-06	0	0	5.07325e-07	4.12534e-06	0.000310851
Anaerococcus_OTU_489	6.94975e-06	2.25719e-06	0	0	0	0	2.2281e-07	0	9.94338e-05	0.000310194	0.00015307
Ruminococcaceae_OTU_1944_BT	6.75816e-06	0	4.06802e-06	0	0	0	3.44423e-07	0	0	3.91473e-07	8.11858e-05
Blautia_OTU_327	6.61435e-06	3.30341e-06	0	0	0	0	0	0	2.12833e-06	1.41772e-07	8.48706e-05
Peptostreptococcaceae_OTU_295	5.76242e-06	8.6349e-05	0	0	0	0	0.00200581	3.74162e-05	2.76712e-07	4.69314e-07	0.000372594
Blautia_OTU_405	5.21228e-06	5.17182e-06	3.89436e-07	0	1.38973e-06	0	0	0	2.45219e-07	4.71565e-07	0.000149396
Erysipelotrichaceae_OTU_267	5.02742e-06	0	0	0	0	0	0	0	0	7.90106e-08	0.0003989
Ruminococcaceae_G-3_bacterium_HMT_366_BT	4.8651e-06	0	0	0	0	0	0	0	0	1.39649e-06	0.000179238
Prevotella_OTU_847_BT	4.6988e-06	6.56408e-07	1.70423e-06	0	1.16813e-06	0	0	3.20447e-06	1.2464e-06	4.12524e-05	0.00158049
Serratia_marcescens_BT	4.62488e-06	1.30515e-06	1.9951e-06	0	7.18888e-07	4.95059e-06	0.00255272	0.00916484	7.92877e-07	6.26769e-07	5.0191e-06
Porphyromonas_catoniae	4.57946e-06	1.35145e-05	0.000136939	0	1.12028e-05	0	0	0	0.000463971	2.00205e-06	2.17619e-06
Corynebacterium_OTU_323	4.56704e-06	0	4.0776e-06	0	3.75385e-05	4.53963e-06	0	0	8.21044e-05	0.00025133	8.13143e-05
Blautia_OTU_71	4.48528e-06	3.18266e-06	0	0	0	0	0	0	4.99729e-08	1.2132e-07	0.000161464
Jonquetella_anthropi	4.14071e-06	2.01907e-07	0	0	2.52679e-07	4.31109e-06	6.42843e-07	6.38579e-07	1.07077e-06	0.000247642	0.00092606
Blautia_OTU_420	3.90768e-06	1.1935e-06	0	0	0	0	0	5.10398e-05	2.04881e-06	1.77077e-07	7.70893e-05
Bacteroides_OTU_476	3.75914e-06	7.37011e-06	0	0	0.00064492	6.26506e-05	0.00164372	0.000230917	3.37102e-06	2.3507e-06	0.000310163
Fusobacterium_nucleatum_subsp._polymorphum	3.74044e-06	1.47087e-06	8.12047e-06	0	3.73425e-06	0	0	0	5.46574e-05	4.18197e-07	3.06117e-07
Lachnospira_OTU_176	3.62193e-06	6.76314e-06	0	0	1.13219e-06	0	0	0	1.55671e-07	4.14348e-07	0.000128794
Anaerococcus_OTU_325	3.56764e-06	0	0	0	0	0	0	0	3.44663e-07	6.19078e-06	0.000497469
Lachnospiraceae_OTU_123_BT	3.26626e-06	4.77398e-06	0	0	2.06484e-07	0	0	0	2.56772e-07	1.39701e-06	0.000166594
Sutterella_OTU_99	3.12703e-06	1.47968e-07	1.77951e-06	0	1.55779e-06	0	0	0	3.82021e-05	4.27586e-05	0.00129025
Porphyromonas_OTU_112_BT	3.05938e-06	2.07751e-07	0	0	0	0	0	0	2.04881e-07	0	0.000141373
Leptotrichia_OTU_46_BT	2.87983e-06	3.58049e-06	0	0	4.37709e-07	2.30075e-06	2.02849e-05	4.74384e-05	8.19525e-07	0	6.81275e-05
Anaerococcus_OTU_343	2.51371e-06	0	0	0	0	0	0	0	4.37816e-05	5.57864e-05	0.000761886
Ruminococcaceae_OTU_4105	2.51081e-06	1.47198e-05	0	0	1.2634e-07	0	5.78399e-06	0	4.21504e-07	6.72117e-08	0.000220573
Lachnospiraceae_OTU_529	2.48038e-06	0	1.45243e-06	0	8.84377e-07	0	8.26616e-06	0	0	6.28891e-07	0.000209769
Rikenellaceae_OTU_271	2.34115e-06	0	0	0	0	1.77797e-06	0	0	4.82174e-07	1.89852e-07	0.000385741
Prevotella_OTU_447_BT	2.34115e-06	0	4.84655e-07	0	0	0	0	3.20447e-06	7.25178e-07	0.000102676	0.000404875
Ruminococcaceae_OTU_620	2.08636e-06	3.12891e-06	0	0	1.00718e-05	5.32549e-06	2.9276e-05	0	8.3384e-05	0.000198782	9.70771e-06
Finegoldia_magna_BT	2.08636e-06	3.97832e-07	5.80034e-07	0	0	0	8.17974e-07	0	4.63599e-07	1.39699e-05	9.71792e-05
Prevotella_OTU_1112	2.07669e-06	6.36188e-07	0	0	6.21312e-05	0	0	0	1.89842e-06	1.88553e-05	0.00312362
Brevibacterium_OTU_32	1.90793e-06	3.91336e-07	0	0	3.79019e-06	0	0	4.64001e-07	6.88225e-06	7.12074e-05	0.000353184
Prevotella_bivia_BT	1.85428e-06	3.49343e-06	4.42389e-06	0	0	5.94135e-06	5.33231e-07	0	1.98093e-06	0.000164081	0.000711624
Peptostreptococcaceae_XIG-5_saphenum	1.84011e-06	3.38001e-05	0	0	0	0	0	0	0.000207972	4.48563e-07	9.98879e-07
Peptostreptococcaceae_OTU_155	1.66273e-06	0	0	0	0	6.18824e-07	0	0	2.04095e-07	1.64097e-06	0.000137886
WAL_1855D_OTU_29_BT	1.65359e-06	0	0	0	1.2634e-07	0	0	0	3.6186e-07	4.65256e-07	9.90772e-05
Propionibacteriaceae_OTU_100	1.627e-06	0	0	0	0	8.62218e-06	0	8.63452e-07	8.18803e-05	0.000430933	0.000137864
Finegoldia_OTU_8	1.57176e-06	0	0	0	0	0	0	0	1.07394e-06	4.29355e-07	7.34938e-05
Rikenellaceae_OTU_56	1.57176e-06	6.36531e-06	0	0	7.19649e-06	0	1.82188e-05	0	3.788e-07	0	0.000311773
Bacteroides_OTU_1139_BT	1.43308e-06	0	4.0776e-06	0	8.49309e-06	6.04794e-06	3.25588e-05	2.60555e-05	4.64505e-07	1.43278e-07	0.000158298
Bacteroides_OTU_785	1.36072e-06	0	0	0	0.000618396	6.5883e-05	0.000900284	7.38645e-05	1.13845e-06	7.55251e-08	6.65862e-05
Dialister_OTU_39_BT	1.1781e-06	5.96748e-06	0	0	1.1281e-06	4.78526e-07	5.04127e-06	0	5.18904e-08	8.46514e-07	0.000105573
Capnocytophaga_sputigena	1.15054e-06	3.30641e-05	4.03304e-07	0	1.51392e-06	0	0	0	0.00023875	5.66438e-06	4.61175e-07
Kingella_denitrificans	1.14185e-06	4.78255e-05	0	0	7.2853e-06	0	0	0	0.000625101	6.72825e-08	0
Anaerococcus_lactolyticus_BT	1.13719e-06	0	0	0	0	0	0	0	6.44397e-07	2.27683e-05	0.000131988
Coriobacteriaceae_OTU_206_BT	1.03834e-06	0	0	0	1.42046e-06	5.28023e-06	1.54002e-06	0	3.23591e-06	8.42777e-05	2.60945e-05
Erysipelotrichaceae_OTU_170	8.83503e-07	1.55154e-05	0	0	8.17306e-05	0	1.51169e-05	0	1.04411e-07	1.84765e-06	0.000312153
Porphyromonas_OTU_7_BT	8.76851e-07	0	0	0	3.01871e-06	0	0	0	3.69562e-07	4.7103e-06	0.000323911
Clostridium_OTU_741	8.26793e-07	3.14287e-05	0	0	1.2634e-07	0	0	0	0	2.25324e-07	0.000112655
Prevotella_OTU_848_BT	7.85882e-07	1.23176e-06	7.7226e-06	0	2.24362e-06	8.63336e-06	1.88169e-06	0	3.45696e-07	7.06896e-06	0.000681428
1-68_OTU_6_BT	7.85882e-07	0	0	0	3.79019e-07	0	0	0	1.91015e-07	5.58081e-06	0.000114332
Alloprevotella_tannerae	7.58334e-07	2.76136e-06	0	0	0	0	0	0	0.000311001	0	2.94723e-06
Solibacterales_OTU_120_BT	7.02621e-07	1.59133e-06	0	0	0	0	3.44423e-07	1.276e-05	0	5.52061e-07	6.52977e-05
S24-7_OTU_1436	6.13568e-07	1.09915e-06	0	0	9.10523e-06	0	0.000399548	0.000713615	8.48883e-06	0	5.31518e-05
Mollicutes_G-1_bacterium_HMT_504	4.60065e-07	1.81717e-06	0	0	0	0	0	4.64001e-07	0.00053705	3.4949e-07	6.60866e-08
Prevotella_sp._HMT_526	4.60065e-07	2.47477e-06	0	0	1.55779e-06	0	0	0	0.0001288	2.08888e-06	1.45825e-06
Roseburia_OTU_81	4.41752e-07	0	5.80034e-07	0	2.41615e-06	0	1.20548e-05	6.38579e-07	3.17834e-06	1.58833e-06	0.000372148
Dialister_micraerophilus_BT	4.41106e-07	7.02391e-07	0	0	0	1.53576e-06	0	1.17563e-06	3.03483e-06	7.78622e-05	8.34835e-05
Bacteroides_OTU_179	3.06784e-07	0	0	0	1.68511e-05	0	0.000391495	0.000728503	5.94218e-06	1.48019e-07	4.19964e-05
Granulicatella_OTU_19	0	5.1934e-05	0.000160968	0	3.3093e-06	0	0	0	0.000306454	2.47023e-06	1.02208e-07
Porphyromonas_sp._HMT_275	0	1.33491e-05	0	0	0	0	0	0	0.000157095	2.32029e-07	1.2642e-06
Treponema_sp._HMT_238	0	0	0	0	0	2.36433e-06	0	0	0.000267187	1.41732e-07	3.46912e-07
Fretibacterium_sp._HMT_359	0	6.60723e-06	0	0	0	0	0	0	0.0001099	4.42753e-07	0
Lactobacillus_vaginalis	0	5.14812e-06	3.3677e-06	0	9.87466e-06	5.85804e-05	7.23289e-05	0	0.000113988	0.000614512	2.22407e-05
Tissierellaceae_ph2_OTU_13	0	0	3.89436e-07	0	8.46475e-06	0	1.68245e-07	0	7.4053e-05	3.58518e-07	0.00137276
Ruminococcus_OTU_907	0	0	1.45243e-06	0	6.62054e-06	0	2.06654e-06	0	3.87999e-05	1.47717e-06	0.000310297
Actinoplanes_OTU_8_BT	0	1.56225e-05	0	0	3.64135e-05	4.31109e-06	0.000978674	0.000401143	7.91318e-06	1.60243e-05	0.000102907
Ruminococcaceae_OTU_3898	0	0	0	0	0	0	0	0	1.04777e-06	6.62575e-08	0.000312121
Varibaculum_OTU_2	0	0	3.45817e-06	0	3.79019e-07	0	3.91324e-06	0	1.99177e-05	1.8486e-05	0.000490522
Prevotella_OTU_1082	0	5.4939e-07	0	0	0	0	0	0	1.14272e-05	3.93329e-05	0.0016553
Dialister_OTU_93_BT	0	0	0	0	0	0	0	0	5.58028e-06	0.000105911	9.63683e-05
Ruminococcus_OTU_708	0	3.97832e-07	0	0	2.83038e-06	0	1.82544e-05	0	2.04881e-07	3.28861e-06	0.000324109
Dorea_OTU_181	0	0	0	0	0	0	0	0.000165879	0	5.08493e-07	0.000201524
Peptoniphilus_OTU_60_BT	0	0	0	0	0	0	1.85205e-07	0	1.95072e-06	2.71544e-05	0.000168984
Lactobacillus_OTU_133_BT	0	1.04394e-06	0	0	3.34395e-07	0	0	0	7.49475e-06	0.000177544	8.30895e-06
Lachnospira_OTU_2	0	9.4684e-05	0	0	0	0	4.13308e-06	0	4.47269e-07	5.19711e-07	0.000445718
Rikenellaceae_OTU_138	0	0	0	0	0	0	8.24316e-06	0	1.26034e-06	0	0.000239493
Lachnospira_OTU_51	0	4.55582e-07	3.55872e-07	0	5.05358e-07	0	3.23758e-05	0	1.39464e-05	1.00472e-06	0.000412206
Dialister_invisus_BT	0	1.35616e-05	0	0	0	0	0	0	3.54428e-06	2.70888e-07	0.000263067
Aerococcus_OTU_8_BT	0	2.46962e-06	0	0	6.06744e-07	1.53576e-06	0	0	6.58266e-06	7.71177e-05	1.99441e-05
Anaerococcus_OTU_283	0	0	1.52765e-06	0	0	0	0	0	9.08502e-07	0.00010597	0.000804322
Tissierellaceae_OTU_51	0	0	0	0	0	0	0	0	4.99389e-07	3.43228e-05	0.000114387
Megasphaera_OTU_42	0	0	0	0	1.28811e-06	0	0	0	1.56197e-06	3.16775e-06	0.000516031
Oscillospira_OTU_612	0	0	0	0	0	0	0	0	1.54547e-07	0	0.000104898
Anaerococcus_OTU_482	0	1.94521e-06	0.0001017	0	1.2634e-07	2.8176e-06	0	0	0	6.01009e-06	7.98483e-05
Oscillospira_OTU_310	0	7.10431e-07	0	0	0	0	5.51077e-06	0	5.31825e-07	1.29431e-06	9.96859e-05
Clostridiales_OTU_5085	0	0	0	0	0	0	7.23289e-06	0	3.08188e-07	1.19685e-06	0.000193543
Phascolarctobacterium_OTU_97	0	0	0	0	2.03713e-06	0	0	5.10398e-06	3.34851e-06	1.54452e-07	0.000284129
Ruminococcaceae_OTU_668	0	8.35447e-06	0	0	0	0	0	5.86958e-05	0	9.77985e-08	0.00023824
Dialister_OTU_4_BT	0	3.97832e-07	3.45817e-06	0	0	0	0	0	5.4322e-07	6.38065e-06	0.000270358
Roseburia_OTU_6	0	0	0	0	0	0	6.88847e-06	0	1.95246e-06	4.63472e-07	0.000365854
Rikenellaceae_OTU_127	0	2.59218e-06	0	0	2.26438e-06	0	0	0	0	1.48019e-07	0.00029286
Bacteroides_OTU_1318	0	2.90417e-05	0	0	1.53234e-05	2.81444e-06	3.77129e-05	6.06259e-05	3.77281e-07	9.66691e-08	0.000446496
Anaerococcus_OTU_207	0	0	0	0	2.40045e-06	0	0	0	6.84578e-07	2.87187e-07	0.000540981
Peptostreptococcaceae_OTU_84_BT	0	5.42931e-06	0	0	0	0	0	2.9298e-07	2.10676e-07	7.22417e-05	0.000209703
Peptoniphilus_OTU_61_BT	0	1.59133e-06	0	0	0	0	0	0	4.12744e-07	4.03069e-07	4.56065e-05
1-68_OTU_12_BT	0	0	0	0	0	0	0	0	1.95246e-07	5.74255e-07	0.000121704
Prevotella_OTU_1009_BT	0	2.82461e-05	0	0	8.90049e-06	0	1.89406e-05	3.0194e-06	9.43203e-08	2.80243e-07	0.000332802
Sutterella_OTU_123	0	8.7523e-06	0	0	0	0	1.55967e-06	0	6.92395e-07	1.48769e-06	0.000691178
Olsenella_sp._HMT_939	0	0	0	0	0	0	2.2281e-07	0	5.25001e-07	8.61109e-08	0.000104681
ph2_OTU_4_BT	0	3.97832e-07	0	0	0	0	1.81113e-07	0	0	2.43428e-06	0.000190442
Dialister_OTU_95_BT	0	0	0	0	1.2634e-07	0	0	1.94134e-06	4.23287e-08	5.28371e-06	0.000106393
Varibaculum_OTU_14	0	3.91336e-07	1.52765e-06	0	0	0	1.72649e-07	0	3.77167e-07	3.55863e-06	0.000739472
Megasphaera_OTU_76	0	0	0	0	0	0	0	0	1.48123e-07	6.08632e-07	0.000358727
Mogibacterium_OTU_129_BT	0	0	0	0	0	0	0	0	0	0	6.77395e-05
Oscillospira_OTU_254	0	0	0	0	1.04179e-06	0	0	0	7.10426e-08	2.21202e-07	0.000236335
