# Supplementary material for: The influence of maternal factors on the neonatal microbiome and health
Source: Research Square preprint supplement (doi:10.21203/rs.3.rs-2485214/v1), 2023-02-02
Supplement: Supplementary file 4 [file 814a87c3339789d5ec5910a7.xlsx]

## Sheet: Annotation
Title	Experimental designs in this study.
Sheet 1	Sample collection time.
Sheet 2	Paired maternal and neonatal sample sets. Samples of the maternal microbiomes and metadata were collected in the last visit of pregnancy. Neonatal samples were collected in the first visits of day 0, 1, and 2, respectively. Neonatal metadata were collected in the first visit after childbirth.
Sheet 3	Design for the association analysis between factors in the metadata and the neonatal microbiome. Neonatal microbiomes and metadata in the first visit after birth and maternal microbiomes and metadata in the last visit of pregnancy were chosen for each mother-neonate dyad.
Sheet 4	Design for the association analysis between maternal lipid and the neonatal microbiome. Neonatal microbiomes in the first visit after birth and lipidomics data in the last visit of pregnancy collected from the vaginal fluid were chosen for each mother-neonate dyad.
Sheet 5	Design for the association analysis between maternal cytokine and the neonatal microbiome. Neonatal microbiomes in the first visit after birth and cytokine data in the last visit of pregnancy collected from the vaginal fluid were chosen for each mother-neonate dyad.
Sheet 6	Design for testing coexistence of taxa in each neonatal-maternal microbiome dya. Neonatal microbiomes in the first visit after birth and maternal microbiomes in the last visit of pregnancy were chosen for each mother-neonate dyad.
Sheet 7	Design with 20 sets of paired NB, NR, NS, and metadata from 20 sets of mother-neonate dyads.
Term	Annotation
NB	The neonatal buccal microbiome
NR	The neonatal rectal microbiome
NS	The neonatal stool microbiome
MB	The maternal buccal microbiome
MR	The maternal rectal microbiome
MV	The maternal vaginal microbiome

## Sheet: Sheet 1
ParticipantID (matched with metadata)	SampleID	Sample type	Weeks of pregnant	Days relative to birth	Sample collection time
Psudo_participant_ID_100	Psudo_sample_ID_1479	MB	36	-1	The 3rd trimester
Psudo_participant_ID_100	Psudo_sample_ID_1483	MR	28	-55	The 3rd trimester
Psudo_participant_ID_100	Psudo_sample_ID_1480	MV	36	-1	The 3rd trimester
Psudo_participant_ID_100	Psudo_sample_ID_1475	NS	NA	1	24~48 hours postpartum
Psudo_participant_ID_100	Psudo_sample_ID_1477	NS	NA	1	24~48 hours postpartum
Psudo_participant_ID_102	Psudo_sample_ID_1513	MB	35	-4	The 3rd trimester
Psudo_participant_ID_102	Psudo_sample_ID_1515	MR	35	-4	The 3rd trimester
Psudo_participant_ID_102	Psudo_sample_ID_1514	MV	35	-4	The 3rd trimester
Psudo_participant_ID_102	Psudo_sample_ID_1508	NB	NA	1	24~48 hours postpartum
Psudo_participant_ID_102	Psudo_sample_ID_1510	NS	NA	1	24~48 hours postpartum
Psudo_participant_ID_103	Psudo_sample_ID_1534	MB	40	-1	The 3rd trimester
Psudo_participant_ID_103	Psudo_sample_ID_1538	MR	39	-11	The 3rd trimester
Psudo_participant_ID_103	Psudo_sample_ID_1535	MV	40	-1	The 3rd trimester
Psudo_participant_ID_103	Psudo_sample_ID_1528	NB	NA	2	48~72 hours postpartum
Psudo_participant_ID_103	Psudo_sample_ID_1530	NS	NA	2	48~72 hours postpartum
Psudo_participant_ID_103	Psudo_sample_ID_1531	NS	NA	1	24~48 hours postpartum
Psudo_participant_ID_104	Psudo_sample_ID_1556	MB	34	-41	The 3rd trimester
Psudo_participant_ID_104	Psudo_sample_ID_1554	MR	39	-3	The 3rd trimester
Psudo_participant_ID_104	Psudo_sample_ID_1553	MV	39	-3	The 3rd trimester
Psudo_participant_ID_104	Psudo_sample_ID_1548	NR	NA	2	48~72 hours postpartum
Psudo_participant_ID_104	Psudo_sample_ID_1549	NS	NA	2	48~72 hours postpartum
Psudo_participant_ID_106	Psudo_sample_ID_1575	MB	39	-1	The 3rd trimester
Psudo_participant_ID_106	Psudo_sample_ID_1577	MR	39	-1	The 3rd trimester
Psudo_participant_ID_106	Psudo_sample_ID_1576	MV	39	-1	The 3rd trimester
Psudo_participant_ID_106	Psudo_sample_ID_1570	NB	NA	2	48~72 hours postpartum
Psudo_participant_ID_106	Psudo_sample_ID_1572	NS	NA	2	48~72 hours postpartum
Psudo_participant_ID_107	Psudo_sample_ID_1595	MB	38	-6	The 3rd trimester
Psudo_participant_ID_107	Psudo_sample_ID_1596	MR	38	-6	The 3rd trimester
Psudo_participant_ID_107	Psudo_sample_ID_1598	MV	30	-57	The 3rd trimester
Psudo_participant_ID_107	Psudo_sample_ID_1592	NR	NA	1	24~48 hours postpartum
Psudo_participant_ID_108	Psudo_sample_ID_1609	MB	35	-30	The 3rd trimester
Psudo_participant_ID_108	Psudo_sample_ID_1611	MR	35	-30	The 3rd trimester
Psudo_participant_ID_108	Psudo_sample_ID_1610	MV	35	-30	The 3rd trimester
Psudo_participant_ID_108	Psudo_sample_ID_1605	NB	NA	1	24~48 hours postpartum
Psudo_participant_ID_108	Psudo_sample_ID_1603	NS	NA	2	48~72 hours postpartum
Psudo_participant_ID_108	Psudo_sample_ID_1604	NS	NA	1	24~48 hours postpartum
Psudo_participant_ID_109	Psudo_sample_ID_1627	MB	14	-153	The 2nd trimester
Psudo_participant_ID_109	Psudo_sample_ID_1626	MR	36	-1	The 3rd trimester
Psudo_participant_ID_109	Psudo_sample_ID_1628	MV	14	-153	The 2nd trimester
Psudo_participant_ID_109	Psudo_sample_ID_1623	NB	NA	0	0~24 hours postpartum
Psudo_participant_ID_11	Psudo_sample_ID_134	MB	37	-24	The 3rd trimester
Psudo_participant_ID_11	Psudo_sample_ID_133	MV	40	-1	The 3rd trimester
Psudo_participant_ID_11	Psudo_sample_ID_130	NB	NA	1	24~48 hours postpartum
Psudo_participant_ID_11	Psudo_sample_ID_131	NB	NA	0	0~24 hours postpartum
Psudo_participant_ID_11	Psudo_sample_ID_129	NS	NA	1	24~48 hours postpartum
Psudo_participant_ID_110	Psudo_sample_ID_1641	MB	28	-87	The 3rd trimester
Psudo_participant_ID_110	Psudo_sample_ID_1640	MR	38	-19	The 3rd trimester
Psudo_participant_ID_110	Psudo_sample_ID_1639	MV	38	-19	The 3rd trimester
Psudo_participant_ID_110	Psudo_sample_ID_1633	NS	NA	1	24~48 hours postpartum
Psudo_participant_ID_112	Psudo_sample_ID_1660	MV	28	-6	The 3rd trimester
Psudo_participant_ID_112	Psudo_sample_ID_1655	NB	NA	1	24~48 hours postpartum
Psudo_participant_ID_112	Psudo_sample_ID_1656	NR	NA	1	24~48 hours postpartum
Psudo_participant_ID_112	Psudo_sample_ID_1659	NR	NA	0	0~24 hours postpartum
Psudo_participant_ID_113	Psudo_sample_ID_1668	MB	36	-29	The 3rd trimester
Psudo_participant_ID_113	Psudo_sample_ID_1670	MR	36	-29	The 3rd trimester
Psudo_participant_ID_113	Psudo_sample_ID_1669	MV	36	-29	The 3rd trimester
Psudo_participant_ID_113	Psudo_sample_ID_1667	NB	NA	0	0~24 hours postpartum
Psudo_participant_ID_113	Psudo_sample_ID_1666	NR	NA	1	24~48 hours postpartum
Psudo_participant_ID_115	Psudo_sample_ID_1696	MB	39	NA	The 3rd trimester
Psudo_participant_ID_115	Psudo_sample_ID_1698	MR	39	NA	The 3rd trimester
Psudo_participant_ID_115	Psudo_sample_ID_1697	MV	39	NA	The 3rd trimester
Psudo_participant_ID_115	Psudo_sample_ID_1692	NB	NA	1	24~48 hours postpartum
Psudo_participant_ID_115	Psudo_sample_ID_1694	NB	NA	0	0~24 hours postpartum
Psudo_participant_ID_116	Psudo_sample_ID_1722	MB	36	-16	The 3rd trimester
Psudo_participant_ID_116	Psudo_sample_ID_1724	MR	36	-16	The 3rd trimester
Psudo_participant_ID_116	Psudo_sample_ID_1723	MV	36	-16	The 3rd trimester
Psudo_participant_ID_116	Psudo_sample_ID_1720	NB	NA	1	24~48 hours postpartum
Psudo_participant_ID_116	Psudo_sample_ID_1717	NS	NA	1	24~48 hours postpartum
Psudo_participant_ID_117	Psudo_sample_ID_1736	MB	33	-1	The 3rd trimester
Psudo_participant_ID_117	Psudo_sample_ID_1738	MR	33	-1	The 3rd trimester
Psudo_participant_ID_117	Psudo_sample_ID_1737	MV	33	-1	The 3rd trimester
Psudo_participant_ID_117	Psudo_sample_ID_1732	NB	NA	1	24~48 hours postpartum
Psudo_participant_ID_117	Psudo_sample_ID_1734	NB	NA	0	0~24 hours postpartum
Psudo_participant_ID_119	Psudo_sample_ID_1766	MB	30	-84	The 3rd trimester
Psudo_participant_ID_119	Psudo_sample_ID_1765	MR	35	-7	The 3rd trimester
Psudo_participant_ID_119	Psudo_sample_ID_1764	MV	35	-7	The 3rd trimester
Psudo_participant_ID_119	Psudo_sample_ID_1758	NB	NA	1	24~48 hours postpartum
Psudo_participant_ID_119	Psudo_sample_ID_1760	NB	NA	0	0~24 hours postpartum
Psudo_participant_ID_119	Psudo_sample_ID_1759	NR	NA	1	24~48 hours postpartum
Psudo_participant_ID_12	Psudo_sample_ID_139	MB	39	NA	The 3rd trimester
Psudo_participant_ID_12	Psudo_sample_ID_144	MR	36	-19	The 3rd trimester
Psudo_participant_ID_12	Psudo_sample_ID_140	MV	39	NA	The 3rd trimester
Psudo_participant_ID_12	Psudo_sample_ID_138	NB	NA	0	0~24 hours postpartum
Psudo_participant_ID_120	Psudo_sample_ID_1780	MB	36	-1	The 3rd trimester
Psudo_participant_ID_120	Psudo_sample_ID_1782	MR	36	-1	The 3rd trimester
Psudo_participant_ID_120	Psudo_sample_ID_1781	MV	36	-1	The 3rd trimester
Psudo_participant_ID_120	Psudo_sample_ID_1776	NB	NA	1	24~48 hours postpartum
Psudo_participant_ID_120	Psudo_sample_ID_1778	NB	NA	0	0~24 hours postpartum
Psudo_participant_ID_120	Psudo_sample_ID_1775	NS	NA	1	24~48 hours postpartum
Psudo_participant_ID_124	Psudo_sample_ID_1835	MB	35	-1	The 3rd trimester
Psudo_participant_ID_124	Psudo_sample_ID_1837	MR	35	-1	The 3rd trimester
Psudo_participant_ID_124	Psudo_sample_ID_1836	MV	35	-1	The 3rd trimester
Psudo_participant_ID_124	Psudo_sample_ID_1834	NB	NA	1	24~48 hours postpartum
Psudo_participant_ID_125	Psudo_sample_ID_1856	MB	36	NA	The 3rd trimester
Psudo_participant_ID_125	Psudo_sample_ID_1861	MR	29	-44	The 3rd trimester
Psudo_participant_ID_125	Psudo_sample_ID_1857	MV	36	NA	The 3rd trimester
Psudo_participant_ID_125	Psudo_sample_ID_1850	NB	NA	2	48~72 hours postpartum
Psudo_participant_ID_126	Psudo_sample_ID_1869	MB	39	NA	The 3rd trimester
Psudo_participant_ID_126	Psudo_sample_ID_1871	MR	39	NA	The 3rd trimester
Psudo_participant_ID_126	Psudo_sample_ID_1870	MV	39	NA	The 3rd trimester
Psudo_participant_ID_126	Psudo_sample_ID_1864	NB	NA	2	48~72 hours postpartum
Psudo_participant_ID_129	Psudo_sample_ID_1894	MB	29	-62	The 3rd trimester
Psudo_participant_ID_129	Psudo_sample_ID_1896	MR	29	-62	The 3rd trimester
Psudo_participant_ID_129	Psudo_sample_ID_1892	MV	32	-46	The 3rd trimester
Psudo_participant_ID_129	Psudo_sample_ID_1889	NB	NA	0	0~24 hours postpartum
Psudo_participant_ID_129	Psudo_sample_ID_1888	NR	NA	1	24~48 hours postpartum
Psudo_participant_ID_130	Psudo_sample_ID_1908	MB	36	-35	The 3rd trimester
Psudo_participant_ID_130	Psudo_sample_ID_1910	MR	36	-35	The 3rd trimester
Psudo_participant_ID_130	Psudo_sample_ID_1903	MV	41	-1	The 3rd trimester
Psudo_participant_ID_130	Psudo_sample_ID_1898	NB	NA	1	24~48 hours postpartum
Psudo_participant_ID_131	Psudo_sample_ID_1919	MB	36	-1	The 3rd trimester
Psudo_participant_ID_131	Psudo_sample_ID_1924	MR	29	-51	The 3rd trimester
Psudo_participant_ID_131	Psudo_sample_ID_1921	MV	34	-16	The 3rd trimester
Psudo_participant_ID_131	Psudo_sample_ID_1914	NB	NA	2	48~72 hours postpartum
Psudo_participant_ID_131	Psudo_sample_ID_1915	NR	NA	2	48~72 hours postpartum
Psudo_participant_ID_131	Psudo_sample_ID_1918	NR	NA	1	24~48 hours postpartum
Psudo_participant_ID_131	Psudo_sample_ID_1913	NS	NA	2	48~72 hours postpartum
Psudo_participant_ID_131	Psudo_sample_ID_1916	NS	NA	1	24~48 hours postpartum
Psudo_participant_ID_132	Psudo_sample_ID_1939	MB	37	-15	The 3rd trimester
Psudo_participant_ID_132	Psudo_sample_ID_1941	MR	37	-15	The 3rd trimester
Psudo_participant_ID_132	Psudo_sample_ID_1940	MV	37	-15	The 3rd trimester
Psudo_participant_ID_132	Psudo_sample_ID_1934	NB	NA	2	48~72 hours postpartum
Psudo_participant_ID_132	Psudo_sample_ID_1935	NR	NA	2	48~72 hours postpartum
Psudo_participant_ID_133	Psudo_sample_ID_1956	MB	36	NA	The 3rd trimester
Psudo_participant_ID_133	Psudo_sample_ID_1958	MR	36	NA	The 3rd trimester
Psudo_participant_ID_133	Psudo_sample_ID_1960	MV	35	-5	The 3rd trimester
Psudo_participant_ID_133	Psudo_sample_ID_1955	NR	NA	0	0~24 hours postpartum
Psudo_participant_ID_133	Psudo_sample_ID_1951	NS	NA	2	48~72 hours postpartum
Psudo_participant_ID_135	Psudo_sample_ID_1994	MB	33	-34	The 3rd trimester
Psudo_participant_ID_135	Psudo_sample_ID_1996	MR	33	-34	The 3rd trimester
Psudo_participant_ID_135	Psudo_sample_ID_1992	MV	36	-2	The 3rd trimester
Psudo_participant_ID_135	Psudo_sample_ID_1990	NR	NA	0	0~24 hours postpartum
Psudo_participant_ID_136	Psudo_sample_ID_2008	MB	36	-23	The 3rd trimester
Psudo_participant_ID_136	Psudo_sample_ID_2010	MR	36	-23	The 3rd trimester
Psudo_participant_ID_136	Psudo_sample_ID_2006	MV	39	-1	The 3rd trimester
Psudo_participant_ID_136	Psudo_sample_ID_2001	NB	NA	2	48~72 hours postpartum
Psudo_participant_ID_136	Psudo_sample_ID_2002	NR	NA	2	48~72 hours postpartum
Psudo_participant_ID_138	Psudo_sample_ID_2047	MB	27	-7	The 3rd trimester
Psudo_participant_ID_138	Psudo_sample_ID_2049	MR	27	-7	The 3rd trimester
Psudo_participant_ID_138	Psudo_sample_ID_2048	MV	27	-7	The 3rd trimester
Psudo_participant_ID_138	Psudo_sample_ID_2043	NR	NA	2	48~72 hours postpartum
Psudo_participant_ID_138	Psudo_sample_ID_2046	NR	NA	1	24~48 hours postpartum
Psudo_participant_ID_14	Psudo_sample_ID_178	MB	40	-1	The 3rd trimester
Psudo_participant_ID_14	Psudo_sample_ID_180	MR	40	-1	The 3rd trimester
Psudo_participant_ID_14	Psudo_sample_ID_179	MV	40	-1	The 3rd trimester
Psudo_participant_ID_14	Psudo_sample_ID_173	NB	NA	1	24~48 hours postpartum
Psudo_participant_ID_140	Psudo_sample_ID_2075	MB	40	-21	The 3rd trimester
Psudo_participant_ID_140	Psudo_sample_ID_2077	MR	40	-21	The 3rd trimester
Psudo_participant_ID_140	Psudo_sample_ID_2073	MV	39	NA	The 3rd trimester
Psudo_participant_ID_140	Psudo_sample_ID_2069	NB	NA	2	48~72 hours postpartum
Psudo_participant_ID_141	Psudo_sample_ID_2088	MB	33	-3	The 3rd trimester
Psudo_participant_ID_141	Psudo_sample_ID_2090	MR	33	-3	The 3rd trimester
Psudo_participant_ID_141	Psudo_sample_ID_2089	MV	33	-3	The 3rd trimester
Psudo_participant_ID_141	Psudo_sample_ID_2086	NB	NA	0	0~24 hours postpartum
Psudo_participant_ID_142	Psudo_sample_ID_2106	MB	37	-1	The 3rd trimester
Psudo_participant_ID_142	Psudo_sample_ID_2111	MR	33	-29	The 3rd trimester
Psudo_participant_ID_142	Psudo_sample_ID_2107	MV	37	-1	The 3rd trimester
Psudo_participant_ID_142	Psudo_sample_ID_2105	NR	NA	0	0~24 hours postpartum
Psudo_participant_ID_143	Psudo_sample_ID_2124	MB	36	-20	The 3rd trimester
Psudo_participant_ID_143	Psudo_sample_ID_2132	MR	16	-160	The 2nd trimester
Psudo_participant_ID_143	Psudo_sample_ID_2125	MV	36	-20	The 3rd trimester
Psudo_participant_ID_143	Psudo_sample_ID_2119	NB	NA	2	48~72 hours postpartum
Psudo_participant_ID_143	Psudo_sample_ID_2120	NR	NA	2	48~72 hours postpartum
Psudo_participant_ID_143	Psudo_sample_ID_2121	NS	NA	1	24~48 hours postpartum
Psudo_participant_ID_144	Psudo_sample_ID_2143	MB	30	-78	The 3rd trimester
Psudo_participant_ID_144	Psudo_sample_ID_2142	MR	36	-32	The 3rd trimester
Psudo_participant_ID_144	Psudo_sample_ID_2141	MV	36	-32	The 3rd trimester
Psudo_participant_ID_144	Psudo_sample_ID_2136	NB	NA	1	24~48 hours postpartum
Psudo_participant_ID_146	Psudo_sample_ID_2176	MB	38	-1	The 3rd trimester
Psudo_participant_ID_146	Psudo_sample_ID_2178	MR	38	-1	The 3rd trimester
Psudo_participant_ID_146	Psudo_sample_ID_2177	MV	38	-1	The 3rd trimester
Psudo_participant_ID_146	Psudo_sample_ID_2171	NB	NA	1	24~48 hours postpartum
Psudo_participant_ID_146	Psudo_sample_ID_2172	NR	NA	1	24~48 hours postpartum
Psudo_participant_ID_146	Psudo_sample_ID_2175	NR	NA	0	0~24 hours postpartum
Psudo_participant_ID_149	Psudo_sample_ID_2220	MB	36	-5	The 3rd trimester
Psudo_participant_ID_149	Psudo_sample_ID_2222	MR	36	-5	The 3rd trimester
Psudo_participant_ID_149	Psudo_sample_ID_2221	MV	36	-5	The 3rd trimester
Psudo_participant_ID_149	Psudo_sample_ID_2216	NB	NA	1	24~48 hours postpartum
Psudo_participant_ID_149	Psudo_sample_ID_2217	NR	NA	1	24~48 hours postpartum
Psudo_participant_ID_149	Psudo_sample_ID_2215	NS	NA	1	24~48 hours postpartum
Psudo_participant_ID_152	Psudo_sample_ID_2270	MB	36	-8	The 3rd trimester
Psudo_participant_ID_152	Psudo_sample_ID_2272	MR	36	-8	The 3rd trimester
Psudo_participant_ID_152	Psudo_sample_ID_2271	MV	36	-8	The 3rd trimester
Psudo_participant_ID_152	Psudo_sample_ID_2269	NR	NA	1	24~48 hours postpartum
Psudo_participant_ID_153	Psudo_sample_ID_2290	MB	35	-23	The 3rd trimester
Psudo_participant_ID_153	Psudo_sample_ID_2289	MR	38	-1	The 3rd trimester
Psudo_participant_ID_153	Psudo_sample_ID_2288	MV	38	-1	The 3rd trimester
Psudo_participant_ID_153	Psudo_sample_ID_2283	NB	NA	1	24~48 hours postpartum
Psudo_participant_ID_153	Psudo_sample_ID_2284	NR	NA	1	24~48 hours postpartum
Psudo_participant_ID_153	Psudo_sample_ID_2282	NS	NA	1	24~48 hours postpartum
Psudo_participant_ID_154	Psudo_sample_ID_2306	MB	34	-44	The 3rd trimester
Psudo_participant_ID_154	Psudo_sample_ID_2305	MR	38	-16	The 3rd trimester
Psudo_participant_ID_154	Psudo_sample_ID_2304	MV	38	-16	The 3rd trimester
Psudo_participant_ID_154	Psudo_sample_ID_2299	NB	NA	2	48~72 hours postpartum
Psudo_participant_ID_154	Psudo_sample_ID_2301	NB	NA	1	24~48 hours postpartum
Psudo_participant_ID_155	Psudo_sample_ID_2320	MB	38	NA	The 3rd trimester
Psudo_participant_ID_155	Psudo_sample_ID_2322	MR	38	NA	The 3rd trimester
Psudo_participant_ID_155	Psudo_sample_ID_2321	MV	38	NA	The 3rd trimester
Psudo_participant_ID_155	Psudo_sample_ID_2315	NB	NA	2	48~72 hours postpartum
Psudo_participant_ID_155	Psudo_sample_ID_2316	NR	NA	2	48~72 hours postpartum
Psudo_participant_ID_155	Psudo_sample_ID_2317	NS	NA	1	24~48 hours postpartum
Psudo_participant_ID_156	Psudo_sample_ID_2340	MB	18	-140	The 2nd trimester
Psudo_participant_ID_156	Psudo_sample_ID_2342	MR	18	-140	The 2nd trimester
Psudo_participant_ID_156	Psudo_sample_ID_2341	MV	18	-140	The 2nd trimester
Psudo_participant_ID_156	Psudo_sample_ID_2336	NB	NA	1	24~48 hours postpartum
Psudo_participant_ID_156	Psudo_sample_ID_2335	NS	NA	2	48~72 hours postpartum
Psudo_participant_ID_157	Psudo_sample_ID_2351	MB	40	-1	The 3rd trimester
Psudo_participant_ID_157	Psudo_sample_ID_2353	MR	40	-1	The 3rd trimester
Psudo_participant_ID_157	Psudo_sample_ID_2352	MV	40	-1	The 3rd trimester
Psudo_participant_ID_157	Psudo_sample_ID_2347	NR	NA	1	24~48 hours postpartum
Psudo_participant_ID_159	Psudo_sample_ID_2397	MB	29	-64	The 3rd trimester
Psudo_participant_ID_159	Psudo_sample_ID_2399	MR	29	-64	The 3rd trimester
Psudo_participant_ID_159	Psudo_sample_ID_2394	MV	38	NA	The 3rd trimester
Psudo_participant_ID_159	Psudo_sample_ID_2388	NB	NA	1	24~48 hours postpartum
Psudo_participant_ID_16	Psudo_sample_ID_208	MB	39	NA	The 3rd trimester
Psudo_participant_ID_16	Psudo_sample_ID_210	MR	39	NA	The 3rd trimester
Psudo_participant_ID_16	Psudo_sample_ID_209	MV	39	NA	The 3rd trimester
Psudo_participant_ID_16	Psudo_sample_ID_205	NR	NA	1	24~48 hours postpartum
Psudo_participant_ID_160	Psudo_sample_ID_2415	MB	30	-60	The 3rd trimester
Psudo_participant_ID_160	Psudo_sample_ID_2417	MR	30	-60	The 3rd trimester
Psudo_participant_ID_160	Psudo_sample_ID_2413	MV	38	-4	The 3rd trimester
Psudo_participant_ID_160	Psudo_sample_ID_2409	NB	NA	2	48~72 hours postpartum
Psudo_participant_ID_160	Psudo_sample_ID_2410	NR	NA	2	48~72 hours postpartum
Psudo_participant_ID_161	Psudo_sample_ID_2437	MB	14	-172	The 2nd trimester
Psudo_participant_ID_161	Psudo_sample_ID_2430	MR	39	NA	The 3rd trimester
Psudo_participant_ID_161	Psudo_sample_ID_2429	MV	39	NA	The 3rd trimester
Psudo_participant_ID_161	Psudo_sample_ID_2424	NB	NA	1	24~48 hours postpartum
Psudo_participant_ID_161	Psudo_sample_ID_2426	NB	NA	0	0~24 hours postpartum
Psudo_participant_ID_163	Psudo_sample_ID_2468	MB	33	-38	The 3rd trimester
Psudo_participant_ID_163	Psudo_sample_ID_2469	MR	33	-38	The 3rd trimester
Psudo_participant_ID_163	Psudo_sample_ID_2471	MV	21	-120	The 2nd trimester
Psudo_participant_ID_163	Psudo_sample_ID_2464	NB	NA	1	24~48 hours postpartum
Psudo_participant_ID_164	Psudo_sample_ID_2480	MB	37	-19	The 3rd trimester
Psudo_participant_ID_164	Psudo_sample_ID_2482	MR	37	-19	The 3rd trimester
Psudo_participant_ID_164	Psudo_sample_ID_2481	MV	37	-19	The 3rd trimester
Psudo_participant_ID_164	Psudo_sample_ID_2476	NB	NA	1	24~48 hours postpartum
Psudo_participant_ID_164	Psudo_sample_ID_2477	NR	NA	1	24~48 hours postpartum
Psudo_participant_ID_166	Psudo_sample_ID_2518	MB	39	NA	The 3rd trimester
Psudo_participant_ID_166	Psudo_sample_ID_2523	MR	38	-3	The 3rd trimester
Psudo_participant_ID_166	Psudo_sample_ID_2519	MV	39	NA	The 3rd trimester
Psudo_participant_ID_166	Psudo_sample_ID_2514	NB	NA	1	24~48 hours postpartum
Psudo_participant_ID_167	Psudo_sample_ID_2534	MB	41	-1	The 3rd trimester
Psudo_participant_ID_167	Psudo_sample_ID_2539	MR	33	-57	The 3rd trimester
Psudo_participant_ID_167	Psudo_sample_ID_2535	MV	41	-1	The 3rd trimester
Psudo_participant_ID_167	Psudo_sample_ID_2531	NR	NA	1	24~48 hours postpartum
Psudo_participant_ID_168	Psudo_sample_ID_2549	MB	39	-1	The 3rd trimester
Psudo_participant_ID_168	Psudo_sample_ID_2551	MR	39	-1	The 3rd trimester
Psudo_participant_ID_168	Psudo_sample_ID_2550	MV	39	-1	The 3rd trimester
Psudo_participant_ID_168	Psudo_sample_ID_2544	NB	NA	1	24~48 hours postpartum
Psudo_participant_ID_168	Psudo_sample_ID_2543	NS	NA	1	24~48 hours postpartum
Psudo_participant_ID_169	Psudo_sample_ID_2569	MB	40	NA	The 3rd trimester
Psudo_participant_ID_169	Psudo_sample_ID_2577	MR	32	-52	The 3rd trimester
Psudo_participant_ID_169	Psudo_sample_ID_2570	MV	40	NA	The 3rd trimester
Psudo_participant_ID_169	Psudo_sample_ID_2565	NB	NA	1	24~48 hours postpartum
Psudo_participant_ID_170	Psudo_sample_ID_2592	MB	34	-37	The 3rd trimester
Psudo_participant_ID_170	Psudo_sample_ID_2594	MR	34	-37	The 3rd trimester
Psudo_participant_ID_170	Psudo_sample_ID_2593	MV	34	-37	The 3rd trimester
Psudo_participant_ID_170	Psudo_sample_ID_2588	NB	NA	1	24~48 hours postpartum
Psudo_participant_ID_170	Psudo_sample_ID_2589	NR	NA	1	24~48 hours postpartum
Psudo_participant_ID_171	Psudo_sample_ID_2608	MB	32	-49	The 3rd trimester
Psudo_participant_ID_171	Psudo_sample_ID_2610	MR	32	-49	The 3rd trimester
Psudo_participant_ID_171	Psudo_sample_ID_2609	MV	32	-49	The 3rd trimester
Psudo_participant_ID_171	Psudo_sample_ID_2604	NB	NA	1	24~48 hours postpartum
Psudo_participant_ID_171	Psudo_sample_ID_2606	NB	NA	0	0~24 hours postpartum
Psudo_participant_ID_172	Psudo_sample_ID_2623	MB	40	-1	The 3rd trimester
Psudo_participant_ID_172	Psudo_sample_ID_2625	MR	40	-1	The 3rd trimester
Psudo_participant_ID_172	Psudo_sample_ID_2624	MV	40	-1	The 3rd trimester
Psudo_participant_ID_172	Psudo_sample_ID_2617	NB	NA	2	48~72 hours postpartum
Psudo_participant_ID_172	Psudo_sample_ID_2618	NR	NA	2	48~72 hours postpartum
Psudo_participant_ID_172	Psudo_sample_ID_2622	NR	NA	0	0~24 hours postpartum
Psudo_participant_ID_173	Psudo_sample_ID_2642	MB	32	-52	The 3rd trimester
Psudo_participant_ID_173	Psudo_sample_ID_2643	MV	32	-52	The 3rd trimester
Psudo_participant_ID_173	Psudo_sample_ID_2639	NS	NA	2	48~72 hours postpartum
Psudo_participant_ID_173	Psudo_sample_ID_2640	NS	NA	1	24~48 hours postpartum
Psudo_participant_ID_174	Psudo_sample_ID_2651	MB	39	-1	The 3rd trimester
Psudo_participant_ID_174	Psudo_sample_ID_2653	MR	39	-1	The 3rd trimester
Psudo_participant_ID_174	Psudo_sample_ID_2652	MV	39	-1	The 3rd trimester
Psudo_participant_ID_174	Psudo_sample_ID_2649	NB	NA	0	0~24 hours postpartum
Psudo_participant_ID_174	Psudo_sample_ID_2648	NR	NA	1	24~48 hours postpartum
Psudo_participant_ID_175	Psudo_sample_ID_2674	MB	38	-13	The 3rd trimester
Psudo_participant_ID_175	Psudo_sample_ID_2676	MR	38	-13	The 3rd trimester
Psudo_participant_ID_175	Psudo_sample_ID_2675	MV	38	-13	The 3rd trimester
Psudo_participant_ID_175	Psudo_sample_ID_2670	NB	NA	1	24~48 hours postpartum
Psudo_participant_ID_175	Psudo_sample_ID_2671	NR	NA	1	24~48 hours postpartum
Psudo_participant_ID_178	Psudo_sample_ID_2711	MB	37	-2	The 3rd trimester
Psudo_participant_ID_178	Psudo_sample_ID_2713	MR	37	-2	The 3rd trimester
Psudo_participant_ID_178	Psudo_sample_ID_2712	MV	37	-2	The 3rd trimester
Psudo_participant_ID_178	Psudo_sample_ID_2709	NB	NA	0	0~24 hours postpartum
Psudo_participant_ID_18	Psudo_sample_ID_237	MB	39	NA	The 3rd trimester
Psudo_participant_ID_18	Psudo_sample_ID_239	MR	39	NA	The 3rd trimester
Psudo_participant_ID_18	Psudo_sample_ID_238	MV	39	NA	The 3rd trimester
Psudo_participant_ID_18	Psudo_sample_ID_233	NB	NA	1	24~48 hours postpartum
Psudo_participant_ID_18	Psudo_sample_ID_234	NR	NA	1	24~48 hours postpartum
Psudo_participant_ID_18	Psudo_sample_ID_232	NS	NA	2	48~72 hours postpartum
Psudo_participant_ID_180	Psudo_sample_ID_2747	MB	18	-133	The 2nd trimester
Psudo_participant_ID_180	Psudo_sample_ID_2744	MR	37	-1	The 3rd trimester
Psudo_participant_ID_180	Psudo_sample_ID_2743	MV	37	-1	The 3rd trimester
Psudo_participant_ID_180	Psudo_sample_ID_2740	NR	NA	1	24~48 hours postpartum
Psudo_participant_ID_181	Psudo_sample_ID_2759	MB	41	-1	The 3rd trimester
Psudo_participant_ID_181	Psudo_sample_ID_2761	MR	41	-1	The 3rd trimester
Psudo_participant_ID_181	Psudo_sample_ID_2763	MV	38	-22	The 3rd trimester
Psudo_participant_ID_181	Psudo_sample_ID_2755	NR	NA	2	48~72 hours postpartum
Psudo_participant_ID_182	Psudo_sample_ID_2779	MB	39	NA	The 3rd trimester
Psudo_participant_ID_182	Psudo_sample_ID_2781	MR	39	NA	The 3rd trimester
Psudo_participant_ID_182	Psudo_sample_ID_2786	MV	20	-132	The 2nd trimester
Psudo_participant_ID_182	Psudo_sample_ID_2775	NB	NA	1	24~48 hours postpartum
Psudo_participant_ID_183	Psudo_sample_ID_2796	MB	38	NA	The 3rd trimester
Psudo_participant_ID_183	Psudo_sample_ID_2798	MR	38	NA	The 3rd trimester
Psudo_participant_ID_183	Psudo_sample_ID_2797	MV	38	NA	The 3rd trimester
Psudo_participant_ID_183	Psudo_sample_ID_2792	NB	NA	1	24~48 hours postpartum
Psudo_participant_ID_184	Psudo_sample_ID_2815	MB	37	-4	The 3rd trimester
Psudo_participant_ID_184	Psudo_sample_ID_2817	MR	37	-4	The 3rd trimester
Psudo_participant_ID_184	Psudo_sample_ID_2816	MV	37	-4	The 3rd trimester
Psudo_participant_ID_184	Psudo_sample_ID_2811	NB	NA	1	24~48 hours postpartum
Psudo_participant_ID_185	Psudo_sample_ID_2836	MB	39	NA	The 3rd trimester
Psudo_participant_ID_185	Psudo_sample_ID_2839	MR	38	-14	The 3rd trimester
Psudo_participant_ID_185	Psudo_sample_ID_2838	MV	38	-14	The 3rd trimester
Psudo_participant_ID_185	Psudo_sample_ID_2832	NB	NA	1	24~48 hours postpartum
Psudo_participant_ID_185	Psudo_sample_ID_2830	NS	NA	2	48~72 hours postpartum
Psudo_participant_ID_185	Psudo_sample_ID_2831	NS	NA	1	24~48 hours postpartum
Psudo_participant_ID_186	Psudo_sample_ID_2854	MB	26	-91	The 2nd trimester
Psudo_participant_ID_186	Psudo_sample_ID_2853	MR	33	-49	The 3rd trimester
Psudo_participant_ID_186	Psudo_sample_ID_2852	MV	33	-49	The 3rd trimester
Psudo_participant_ID_186	Psudo_sample_ID_2847	NB	NA	1	24~48 hours postpartum
Psudo_participant_ID_187	Psudo_sample_ID_2867	MB	37	-5	The 3rd trimester
Psudo_participant_ID_187	Psudo_sample_ID_2873	MR	16	-152	The 2nd trimester
Psudo_participant_ID_187	Psudo_sample_ID_2868	MV	37	-5	The 3rd trimester
Psudo_participant_ID_187	Psudo_sample_ID_2863	NB	NA	1	24~48 hours postpartum
Psudo_participant_ID_187	Psudo_sample_ID_2865	NB	NA	0	0~24 hours postpartum
Psudo_participant_ID_187	Psudo_sample_ID_2864	NR	NA	1	24~48 hours postpartum
Psudo_participant_ID_188	Psudo_sample_ID_2880	MB	37	-1	The 3rd trimester
Psudo_participant_ID_188	Psudo_sample_ID_2882	MR	37	-1	The 3rd trimester
Psudo_participant_ID_188	Psudo_sample_ID_2881	MV	37	-1	The 3rd trimester
Psudo_participant_ID_188	Psudo_sample_ID_2875	NB	NA	2	48~72 hours postpartum
Psudo_participant_ID_188	Psudo_sample_ID_2874	NS	NA	2	48~72 hours postpartum
Psudo_participant_ID_188	Psudo_sample_ID_2877	NS	NA	1	24~48 hours postpartum
Psudo_participant_ID_189	Psudo_sample_ID_2904	MB	28	-77	The 3rd trimester
Psudo_participant_ID_189	Psudo_sample_ID_2903	MR	35	-24	The 3rd trimester
Psudo_participant_ID_189	Psudo_sample_ID_2902	MV	35	-24	The 3rd trimester
Psudo_participant_ID_189	Psudo_sample_ID_2898	NB	NA	1	24~48 hours postpartum
Psudo_participant_ID_189	Psudo_sample_ID_2899	NR	NA	1	24~48 hours postpartum
Psudo_participant_ID_189	Psudo_sample_ID_2901	NR	NA	0	0~24 hours postpartum
Psudo_participant_ID_189	Psudo_sample_ID_2897	NS	NA	1	24~48 hours postpartum
Psudo_participant_ID_19	Psudo_sample_ID_249	MB	37	-16	The 3rd trimester
Psudo_participant_ID_19	Psudo_sample_ID_251	MR	37	-16	The 3rd trimester
Psudo_participant_ID_19	Psudo_sample_ID_246	NB	NA	1	24~48 hours postpartum
Psudo_participant_ID_19	Psudo_sample_ID_247	NR	NA	1	24~48 hours postpartum
Psudo_participant_ID_191	Psudo_sample_ID_2926	MB	38	-28	The 3rd trimester
Psudo_participant_ID_191	Psudo_sample_ID_2928	MR	38	-28	The 3rd trimester
Psudo_participant_ID_191	Psudo_sample_ID_2927	MV	38	-28	The 3rd trimester
Psudo_participant_ID_191	Psudo_sample_ID_2922	NB	NA	1	24~48 hours postpartum
Psudo_participant_ID_192	Psudo_sample_ID_2944	MB	38	-7	The 3rd trimester
Psudo_participant_ID_192	Psudo_sample_ID_2946	MR	38	-7	The 3rd trimester
Psudo_participant_ID_192	Psudo_sample_ID_2945	MV	38	-7	The 3rd trimester
Psudo_participant_ID_192	Psudo_sample_ID_2938	NB	NA	1	24~48 hours postpartum
Psudo_participant_ID_192	Psudo_sample_ID_2939	NR	NA	1	24~48 hours postpartum
Psudo_participant_ID_192	Psudo_sample_ID_2943	NR	NA	0	0~24 hours postpartum
Psudo_participant_ID_192	Psudo_sample_ID_2941	NS	NA	1	24~48 hours postpartum
Psudo_participant_ID_193	Psudo_sample_ID_2959	MB	36	-20	The 3rd trimester
Psudo_participant_ID_193	Psudo_sample_ID_2958	MR	39	-1	The 3rd trimester
Psudo_participant_ID_193	Psudo_sample_ID_2960	MV	36	-20	The 3rd trimester
Psudo_participant_ID_193	Psudo_sample_ID_2954	NB	NA	2	48~72 hours postpartum
Psudo_participant_ID_193	Psudo_sample_ID_2955	NR	NA	2	48~72 hours postpartum
Psudo_participant_ID_193	Psudo_sample_ID_2957	NR	NA	1	24~48 hours postpartum
Psudo_participant_ID_193	Psudo_sample_ID_2953	NS	NA	2	48~72 hours postpartum
Psudo_participant_ID_194	Psudo_sample_ID_2975	MB	38	-8	The 3rd trimester
Psudo_participant_ID_194	Psudo_sample_ID_2977	MR	38	-8	The 3rd trimester
Psudo_participant_ID_194	Psudo_sample_ID_2976	MV	38	-8	The 3rd trimester
Psudo_participant_ID_194	Psudo_sample_ID_2971	NB	NA	1	24~48 hours postpartum
Psudo_participant_ID_194	Psudo_sample_ID_2972	NR	NA	1	24~48 hours postpartum
Psudo_participant_ID_194	Psudo_sample_ID_2970	NS	NA	1	24~48 hours postpartum
Psudo_participant_ID_195	Psudo_sample_ID_2993	MB	38	-5	The 3rd trimester
Psudo_participant_ID_195	Psudo_sample_ID_2995	MR	38	-5	The 3rd trimester
Psudo_participant_ID_195	Psudo_sample_ID_2994	MV	38	-5	The 3rd trimester
Psudo_participant_ID_195	Psudo_sample_ID_2988	NB	NA	1	24~48 hours postpartum
Psudo_participant_ID_196	Psudo_sample_ID_3007	MB	35	-28	The 3rd trimester
Psudo_participant_ID_196	Psudo_sample_ID_3006	MR	38	-6	The 3rd trimester
Psudo_participant_ID_196	Psudo_sample_ID_3005	MV	38	-6	The 3rd trimester
Psudo_participant_ID_196	Psudo_sample_ID_3001	NB	NA	1	24~48 hours postpartum
Psudo_participant_ID_197	Psudo_sample_ID_3026	MB	38	-3	The 3rd trimester
Psudo_participant_ID_197	Psudo_sample_ID_3028	MR	38	-3	The 3rd trimester
Psudo_participant_ID_197	Psudo_sample_ID_3027	MV	38	-3	The 3rd trimester
Psudo_participant_ID_197	Psudo_sample_ID_3023	NR	NA	1	24~48 hours postpartum
Psudo_participant_ID_199	Psudo_sample_ID_3057	MB	34	-40	The 3rd trimester
Psudo_participant_ID_199	Psudo_sample_ID_3061	MR	29	-74	The 3rd trimester
Psudo_participant_ID_199	Psudo_sample_ID_3056	MV	36	-22	The 3rd trimester
Psudo_participant_ID_199	Psudo_sample_ID_3050	NB	NA	1	24~48 hours postpartum
Psudo_participant_ID_199	Psudo_sample_ID_3052	NS	NA	1	24~48 hours postpartum
Psudo_participant_ID_2	Psudo_sample_ID_15	MB	40	-1	The 3rd trimester
Psudo_participant_ID_2	Psudo_sample_ID_21	MR	36	-29	The 3rd trimester
Psudo_participant_ID_2	Psudo_sample_ID_20	MV	36	-29	The 3rd trimester
Psudo_participant_ID_2	Psudo_sample_ID_11	NB	NA	2	48~72 hours postpartum
Psudo_participant_ID_20	Psudo_sample_ID_262	MB	40	-1	The 3rd trimester
Psudo_participant_ID_20	Psudo_sample_ID_264	MR	40	-1	The 3rd trimester
Psudo_participant_ID_20	Psudo_sample_ID_263	MV	40	-1	The 3rd trimester
Psudo_participant_ID_20	Psudo_sample_ID_257	NB	NA	1	24~48 hours postpartum
Psudo_participant_ID_20	Psudo_sample_ID_258	NR	NA	1	24~48 hours postpartum
Psudo_participant_ID_200	Psudo_sample_ID_3073	MB	40	NA	The 3rd trimester
Psudo_participant_ID_200	Psudo_sample_ID_3081	MR	32	-59	The 3rd trimester
Psudo_participant_ID_200	Psudo_sample_ID_3074	MV	40	NA	The 3rd trimester
Psudo_participant_ID_200	Psudo_sample_ID_3069	NB	NA	1	24~48 hours postpartum
Psudo_participant_ID_200	Psudo_sample_ID_3070	NR	NA	1	24~48 hours postpartum
Psudo_participant_ID_200	Psudo_sample_ID_3068	NS	NA	1	24~48 hours postpartum
Psudo_participant_ID_201	Psudo_sample_ID_3091	MB	40	-2	The 3rd trimester
Psudo_participant_ID_201	Psudo_sample_ID_3093	MR	40	-2	The 3rd trimester
Psudo_participant_ID_201	Psudo_sample_ID_3092	MV	40	-2	The 3rd trimester
Psudo_participant_ID_201	Psudo_sample_ID_3087	NR	NA	1	24~48 hours postpartum
Psudo_participant_ID_201	Psudo_sample_ID_3085	NS	NA	2	48~72 hours postpartum
Psudo_participant_ID_201	Psudo_sample_ID_3090	NS	NA	1	24~48 hours postpartum
Psudo_participant_ID_202	Psudo_sample_ID_3109	MB	31	-45	The 3rd trimester
Psudo_participant_ID_202	Psudo_sample_ID_3108	MR	33	-31	The 3rd trimester
Psudo_participant_ID_202	Psudo_sample_ID_3107	MV	33	-31	The 3rd trimester
Psudo_participant_ID_202	Psudo_sample_ID_3103	NB	NA	1	24~48 hours postpartum
Psudo_participant_ID_202	Psudo_sample_ID_3105	NB	NA	0	0~24 hours postpartum
Psudo_participant_ID_202	Psudo_sample_ID_3106	NR	NA	0	0~24 hours postpartum
Psudo_participant_ID_202	Psudo_sample_ID_3102	NS	NA	1	24~48 hours postpartum
Psudo_participant_ID_204	Psudo_sample_ID_3150	MB	35	-27	The 3rd trimester
Psudo_participant_ID_204	Psudo_sample_ID_3152	MR	35	-27	The 3rd trimester
Psudo_participant_ID_204	Psudo_sample_ID_3151	MV	35	-27	The 3rd trimester
Psudo_participant_ID_204	Psudo_sample_ID_3146	NB	NA	2	48~72 hours postpartum
Psudo_participant_ID_204	Psudo_sample_ID_3147	NR	NA	2	48~72 hours postpartum
Psudo_participant_ID_205	Psudo_sample_ID_3167	MB	40	-1	The 3rd trimester
Psudo_participant_ID_205	Psudo_sample_ID_3178	MR	15	-179	The 2nd trimester
Psudo_participant_ID_205	Psudo_sample_ID_3168	MV	40	-1	The 3rd trimester
Psudo_participant_ID_205	Psudo_sample_ID_3163	NB	NA	2	48~72 hours postpartum
Psudo_participant_ID_205	Psudo_sample_ID_3165	NB	NA	0	0~24 hours postpartum
Psudo_participant_ID_205	Psudo_sample_ID_3164	NR	NA	2	48~72 hours postpartum
Psudo_participant_ID_205	Psudo_sample_ID_3166	NR	NA	0	0~24 hours postpartum
Psudo_participant_ID_205	Psudo_sample_ID_3162	NS	NA	2	48~72 hours postpartum
Psudo_participant_ID_206	Psudo_sample_ID_3186	MB	39	-1	The 3rd trimester
Psudo_participant_ID_206	Psudo_sample_ID_3188	MR	39	-1	The 3rd trimester
Psudo_participant_ID_206	Psudo_sample_ID_3187	MV	39	-1	The 3rd trimester
Psudo_participant_ID_206	Psudo_sample_ID_3182	NB	NA	1	24~48 hours postpartum
Psudo_participant_ID_206	Psudo_sample_ID_3184	NB	NA	0	0~24 hours postpartum
Psudo_participant_ID_206	Psudo_sample_ID_3183	NR	NA	1	24~48 hours postpartum
Psudo_participant_ID_207	Psudo_sample_ID_3216	MB	38	-1	The 3rd trimester
Psudo_participant_ID_207	Psudo_sample_ID_3219	MR	24	-97	The 2nd trimester
Psudo_participant_ID_207	Psudo_sample_ID_3218	MV	24	-97	The 2nd trimester
Psudo_participant_ID_207	Psudo_sample_ID_3215	NR	NA	0	0~24 hours postpartum
Psudo_participant_ID_208	Psudo_sample_ID_3234	MB	39	NA	The 3rd trimester
Psudo_participant_ID_208	Psudo_sample_ID_3236	MR	39	NA	The 3rd trimester
Psudo_participant_ID_208	Psudo_sample_ID_3235	MV	39	NA	The 3rd trimester
Psudo_participant_ID_208	Psudo_sample_ID_3231	NS	NA	1	24~48 hours postpartum
Psudo_participant_ID_209	Psudo_sample_ID_3251	MB	38	-12	The 3rd trimester
Psudo_participant_ID_209	Psudo_sample_ID_3253	MR	38	-12	The 3rd trimester
Psudo_participant_ID_209	Psudo_sample_ID_3252	MV	38	-12	The 3rd trimester
Psudo_participant_ID_209	Psudo_sample_ID_3247	NB	NA	1	24~48 hours postpartum
Psudo_participant_ID_21	Psudo_sample_ID_285	MB	33	-50	The 3rd trimester
Psudo_participant_ID_21	Psudo_sample_ID_281	MR	40	NA	The 3rd trimester
Psudo_participant_ID_21	Psudo_sample_ID_280	MV	40	NA	The 3rd trimester
Psudo_participant_ID_21	Psudo_sample_ID_276	NR	NA	1	24~48 hours postpartum
Psudo_participant_ID_21	Psudo_sample_ID_277	NS	NA	1	24~48 hours postpartum
Psudo_participant_ID_210	Psudo_sample_ID_3269	MB	39	NA	The 3rd trimester
Psudo_participant_ID_210	Psudo_sample_ID_3271	MR	39	NA	The 3rd trimester
Psudo_participant_ID_210	Psudo_sample_ID_3270	MV	39	NA	The 3rd trimester
Psudo_participant_ID_210	Psudo_sample_ID_3263	NS	NA	2	48~72 hours postpartum
Psudo_participant_ID_211	Psudo_sample_ID_3292	MB	40	-1	The 3rd trimester
Psudo_participant_ID_211	Psudo_sample_ID_3294	MR	40	-1	The 3rd trimester
Psudo_participant_ID_211	Psudo_sample_ID_3293	MV	40	-1	The 3rd trimester
Psudo_participant_ID_211	Psudo_sample_ID_3288	NR	NA	1	24~48 hours postpartum
Psudo_participant_ID_211	Psudo_sample_ID_3289	NS	NA	1	24~48 hours postpartum
Psudo_participant_ID_213	Psudo_sample_ID_3330	MB	37	-22	The 3rd trimester
Psudo_participant_ID_213	Psudo_sample_ID_3332	MR	37	-22	The 3rd trimester
Psudo_participant_ID_213	Psudo_sample_ID_3331	MV	37	-22	The 3rd trimester
Psudo_participant_ID_213	Psudo_sample_ID_3325	NB	NA	2	48~72 hours postpartum
Psudo_participant_ID_213	Psudo_sample_ID_3327	NB	NA	1	24~48 hours postpartum
Psudo_participant_ID_213	Psudo_sample_ID_3326	NR	NA	2	48~72 hours postpartum
Psudo_participant_ID_213	Psudo_sample_ID_3329	NS	NA	1	24~48 hours postpartum
Psudo_participant_ID_214	Psudo_sample_ID_3351	MB	36	-15	The 3rd trimester
Psudo_participant_ID_214	Psudo_sample_ID_3350	MR	38	-1	The 3rd trimester
Psudo_participant_ID_214	Psudo_sample_ID_3349	MV	38	-1	The 3rd trimester
Psudo_participant_ID_214	Psudo_sample_ID_3342	NB	NA	1	24~48 hours postpartum
Psudo_participant_ID_214	Psudo_sample_ID_3346	NB	NA	0	0~24 hours postpartum
Psudo_participant_ID_215	Psudo_sample_ID_3371	MB	37	-35	The 3rd trimester
Psudo_participant_ID_215	Psudo_sample_ID_3373	MR	37	-35	The 3rd trimester
Psudo_participant_ID_215	Psudo_sample_ID_3372	MV	37	-35	The 3rd trimester
Psudo_participant_ID_215	Psudo_sample_ID_3366	NB	NA	2	48~72 hours postpartum
Psudo_participant_ID_215	Psudo_sample_ID_3369	NB	NA	0	0~24 hours postpartum
Psudo_participant_ID_215	Psudo_sample_ID_3367	NR	NA	2	48~72 hours postpartum
Psudo_participant_ID_215	Psudo_sample_ID_3370	NR	NA	0	0~24 hours postpartum
Psudo_participant_ID_215	Psudo_sample_ID_3368	NS	NA	2	48~72 hours postpartum
Psudo_participant_ID_216	Psudo_sample_ID_3388	MB	39	-19	The 3rd trimester
Psudo_participant_ID_216	Psudo_sample_ID_3390	MR	39	-19	The 3rd trimester
Psudo_participant_ID_216	Psudo_sample_ID_3389	MV	39	-19	The 3rd trimester
Psudo_participant_ID_216	Psudo_sample_ID_3383	NB	NA	1	24~48 hours postpartum
Psudo_participant_ID_216	Psudo_sample_ID_3384	NR	NA	1	24~48 hours postpartum
Psudo_participant_ID_217	Psudo_sample_ID_3404	MB	37	-10	The 3rd trimester
Psudo_participant_ID_217	Psudo_sample_ID_3406	MR	37	-10	The 3rd trimester
Psudo_participant_ID_217	Psudo_sample_ID_3405	MV	37	-10	The 3rd trimester
Psudo_participant_ID_217	Psudo_sample_ID_3400	NB	NA	2	48~72 hours postpartum
Psudo_participant_ID_218	Psudo_sample_ID_3419	MB	36	-7	The 3rd trimester
Psudo_participant_ID_218	Psudo_sample_ID_3421	MR	36	-7	The 3rd trimester
Psudo_participant_ID_218	Psudo_sample_ID_3420	MV	36	-7	The 3rd trimester
Psudo_participant_ID_218	Psudo_sample_ID_3416	NB	NA	1	24~48 hours postpartum
Psudo_participant_ID_22	Psudo_sample_ID_298	MB	37	-22	The 3rd trimester
Psudo_participant_ID_22	Psudo_sample_ID_308	MR	21	-189	The 2nd trimester
Psudo_participant_ID_22	Psudo_sample_ID_302	MV	28	-79	The 3rd trimester
Psudo_participant_ID_22	Psudo_sample_ID_293	NB	NA	2	48~72 hours postpartum
Psudo_participant_ID_22	Psudo_sample_ID_294	NR	NA	2	48~72 hours postpartum
Psudo_participant_ID_22	Psudo_sample_ID_295	NS	NA	1	24~48 hours postpartum
Psudo_participant_ID_23	Psudo_sample_ID_315	MB	40	NA	The 3rd trimester
Psudo_participant_ID_23	Psudo_sample_ID_325	MR	9	-216	The 1st trimester
Psudo_participant_ID_23	Psudo_sample_ID_319	MV	37	-25	The 3rd trimester
Psudo_participant_ID_23	Psudo_sample_ID_312	NS	NA	1	24~48 hours postpartum
Psudo_participant_ID_24	Psudo_sample_ID_330	MB	40	-1	The 3rd trimester
Psudo_participant_ID_24	Psudo_sample_ID_332	MR	40	-1	The 3rd trimester
Psudo_participant_ID_24	Psudo_sample_ID_336	MV	28	-80	The 3rd trimester
Psudo_participant_ID_24	Psudo_sample_ID_326	NS	NA	2	48~72 hours postpartum
Psudo_participant_ID_25	Psudo_sample_ID_344	MB	33	-6	The 3rd trimester
Psudo_participant_ID_25	Psudo_sample_ID_346	MR	33	-6	The 3rd trimester
Psudo_participant_ID_25	Psudo_sample_ID_345	MV	33	-6	The 3rd trimester
Psudo_participant_ID_25	Psudo_sample_ID_341	NB	NA	2	48~72 hours postpartum
Psudo_participant_ID_25	Psudo_sample_ID_343	NB	NA	0	0~24 hours postpartum
Psudo_participant_ID_26	Psudo_sample_ID_361	MB	40	-2	The 3rd trimester
Psudo_participant_ID_26	Psudo_sample_ID_363	MR	40	-2	The 3rd trimester
Psudo_participant_ID_26	Psudo_sample_ID_362	MV	40	-2	The 3rd trimester
Psudo_participant_ID_26	Psudo_sample_ID_358	NR	NA	1	24~48 hours postpartum
Psudo_participant_ID_26	Psudo_sample_ID_356	NS	NA	1	24~48 hours postpartum
Psudo_participant_ID_27	Psudo_sample_ID_378	MR	41	-2	The 3rd trimester
Psudo_participant_ID_27	Psudo_sample_ID_377	MV	41	-2	The 3rd trimester
Psudo_participant_ID_27	Psudo_sample_ID_374	NB	NA	0	0~24 hours postpartum
Psudo_participant_ID_27	Psudo_sample_ID_375	NR	NA	0	0~24 hours postpartum
Psudo_participant_ID_28	Psudo_sample_ID_396	MB	39	-10	The 3rd trimester
Psudo_participant_ID_28	Psudo_sample_ID_398	MR	39	-10	The 3rd trimester
Psudo_participant_ID_28	Psudo_sample_ID_397	MV	39	-10	The 3rd trimester
Psudo_participant_ID_28	Psudo_sample_ID_391	NB	NA	2	48~72 hours postpartum
Psudo_participant_ID_28	Psudo_sample_ID_392	NR	NA	2	48~72 hours postpartum
Psudo_participant_ID_29	Psudo_sample_ID_415	MB	35	-1	The 3rd trimester
Psudo_participant_ID_29	Psudo_sample_ID_411	NB	NA	2	48~72 hours postpartum
Psudo_participant_ID_3	Psudo_sample_ID_37	MB	30	-73	The 3rd trimester
Psudo_participant_ID_3	Psudo_sample_ID_36	MR	37	-24	The 3rd trimester
Psudo_participant_ID_3	Psudo_sample_ID_35	MV	37	-24	The 3rd trimester
Psudo_participant_ID_3	Psudo_sample_ID_31	NR	NA	1	24~48 hours postpartum
Psudo_participant_ID_31	Psudo_sample_ID_435	MB	39	NA	The 3rd trimester
Psudo_participant_ID_31	Psudo_sample_ID_438	MR	38	-3	The 3rd trimester
Psudo_participant_ID_31	Psudo_sample_ID_437	MV	38	-3	The 3rd trimester
Psudo_participant_ID_31	Psudo_sample_ID_434	NR	NA	0	0~24 hours postpartum
Psudo_participant_ID_31	Psudo_sample_ID_433	NS	NA	1	24~48 hours postpartum
Psudo_participant_ID_32	Psudo_sample_ID_454	MB	39	-1	The 3rd trimester
Psudo_participant_ID_32	Psudo_sample_ID_456	MR	39	-1	The 3rd trimester
Psudo_participant_ID_32	Psudo_sample_ID_455	MV	39	-1	The 3rd trimester
Psudo_participant_ID_32	Psudo_sample_ID_449	NB	NA	1	24~48 hours postpartum
Psudo_participant_ID_32	Psudo_sample_ID_452	NB	NA	0	0~24 hours postpartum
Psudo_participant_ID_33	Psudo_sample_ID_476	MB	39	NA	The 3rd trimester
Psudo_participant_ID_33	Psudo_sample_ID_478	MR	39	NA	The 3rd trimester
Psudo_participant_ID_33	Psudo_sample_ID_477	MV	39	NA	The 3rd trimester
Psudo_participant_ID_33	Psudo_sample_ID_473	NR	NA	2	48~72 hours postpartum
Psudo_participant_ID_34	Psudo_sample_ID_501	MB	41	NA	The 3rd trimester
Psudo_participant_ID_34	Psudo_sample_ID_502	MV	41	NA	The 3rd trimester
Psudo_participant_ID_34	Psudo_sample_ID_498	NB	NA	1	24~48 hours postpartum
Psudo_participant_ID_34	Psudo_sample_ID_500	NB	NA	0	0~24 hours postpartum
Psudo_participant_ID_34	Psudo_sample_ID_497	NS	NA	1	24~48 hours postpartum
Psudo_participant_ID_34	Psudo_sample_ID_499	NS	NA	1	24~48 hours postpartum
Psudo_participant_ID_36	Psudo_sample_ID_518	MB	30	-6	The 3rd trimester
Psudo_participant_ID_36	Psudo_sample_ID_520	MR	30	-6	The 3rd trimester
Psudo_participant_ID_36	Psudo_sample_ID_519	MV	30	-6	The 3rd trimester
Psudo_participant_ID_36	Psudo_sample_ID_515	NB	NA	1	24~48 hours postpartum
Psudo_participant_ID_36	Psudo_sample_ID_517	NB	NA	0	0~24 hours postpartum
Psudo_participant_ID_37	Psudo_sample_ID_532	MB	38	NA	The 3rd trimester
Psudo_participant_ID_37	Psudo_sample_ID_534	MR	38	NA	The 3rd trimester
Psudo_participant_ID_37	Psudo_sample_ID_533	MV	38	NA	The 3rd trimester
Psudo_participant_ID_37	Psudo_sample_ID_527	NB	NA	2	48~72 hours postpartum
Psudo_participant_ID_37	Psudo_sample_ID_529	NS	NA	1	24~48 hours postpartum
Psudo_participant_ID_38	Psudo_sample_ID_553	MR	37	-22	The 3rd trimester
Psudo_participant_ID_38	Psudo_sample_ID_552	MV	37	-22	The 3rd trimester
Psudo_participant_ID_38	Psudo_sample_ID_549	NB	NA	0	0~24 hours postpartum
Psudo_participant_ID_39	Psudo_sample_ID_563	MB	34	-46	The 3rd trimester
Psudo_participant_ID_39	Psudo_sample_ID_562	MR	41	NA	The 3rd trimester
Psudo_participant_ID_39	Psudo_sample_ID_561	MV	41	NA	The 3rd trimester
Psudo_participant_ID_39	Psudo_sample_ID_556	NB	NA	1	24~48 hours postpartum
Psudo_participant_ID_39	Psudo_sample_ID_558	NB	NA	0	0~24 hours postpartum
Psudo_participant_ID_39	Psudo_sample_ID_557	NR	NA	1	24~48 hours postpartum
Psudo_participant_ID_4	Psudo_sample_ID_53	MB	25	-85	The 2nd trimester
Psudo_participant_ID_4	Psudo_sample_ID_55	MR	25	-85	The 2nd trimester
Psudo_participant_ID_4	Psudo_sample_ID_54	MV	25	-85	The 2nd trimester
Psudo_participant_ID_4	Psudo_sample_ID_49	NB	NA	1	24~48 hours postpartum
Psudo_participant_ID_4	Psudo_sample_ID_51	NB	NA	0	0~24 hours postpartum
Psudo_participant_ID_40	Psudo_sample_ID_577	MB	36	NA	The 3rd trimester
Psudo_participant_ID_40	Psudo_sample_ID_580	MR	36	-18	The 3rd trimester
Psudo_participant_ID_40	Psudo_sample_ID_579	MV	36	-18	The 3rd trimester
Psudo_participant_ID_40	Psudo_sample_ID_573	NB	NA	1	24~48 hours postpartum
Psudo_participant_ID_40	Psudo_sample_ID_574	NR	NA	1	24~48 hours postpartum
Psudo_participant_ID_40	Psudo_sample_ID_576	NR	NA	0	0~24 hours postpartum
Psudo_participant_ID_42	Psudo_sample_ID_609	MB	35	-35	The 3rd trimester
Psudo_participant_ID_42	Psudo_sample_ID_608	MR	40	-1	The 3rd trimester
Psudo_participant_ID_42	Psudo_sample_ID_607	MV	40	-1	The 3rd trimester
Psudo_participant_ID_42	Psudo_sample_ID_602	NB	NA	1	24~48 hours postpartum
Psudo_participant_ID_42	Psudo_sample_ID_603	NR	NA	1	24~48 hours postpartum
Psudo_participant_ID_43	Psudo_sample_ID_623	MB	38	-17	The 3rd trimester
Psudo_participant_ID_43	Psudo_sample_ID_625	MR	38	-17	The 3rd trimester
Psudo_participant_ID_43	Psudo_sample_ID_624	MV	38	-17	The 3rd trimester
Psudo_participant_ID_43	Psudo_sample_ID_620	NS	NA	1	24~48 hours postpartum
Psudo_participant_ID_44	Psudo_sample_ID_639	MB	37	-17	The 3rd trimester
Psudo_participant_ID_44	Psudo_sample_ID_641	MR	37	-17	The 3rd trimester
Psudo_participant_ID_44	Psudo_sample_ID_638	MV	39	-1	The 3rd trimester
Psudo_participant_ID_44	Psudo_sample_ID_632	NB	NA	1	24~48 hours postpartum
Psudo_participant_ID_44	Psudo_sample_ID_634	NS	NA	1	24~48 hours postpartum
Psudo_participant_ID_45	Psudo_sample_ID_658	MB	40	-2	The 3rd trimester
Psudo_participant_ID_45	Psudo_sample_ID_660	MR	40	-2	The 3rd trimester
Psudo_participant_ID_45	Psudo_sample_ID_659	MV	40	-2	The 3rd trimester
Psudo_participant_ID_45	Psudo_sample_ID_654	NB	NA	1	24~48 hours postpartum
Psudo_participant_ID_46	Psudo_sample_ID_679	MB	39	-4	The 3rd trimester
Psudo_participant_ID_46	Psudo_sample_ID_681	MR	39	-4	The 3rd trimester
Psudo_participant_ID_46	Psudo_sample_ID_677	MV	40	-1	The 3rd trimester
Psudo_participant_ID_46	Psudo_sample_ID_673	NR	NA	1	24~48 hours postpartum
Psudo_participant_ID_46	Psudo_sample_ID_675	NR	NA	0	0~24 hours postpartum
Psudo_participant_ID_46	Psudo_sample_ID_671	NS	NA	1	24~48 hours postpartum
Psudo_participant_ID_47	Psudo_sample_ID_693	MB	38	-13	The 3rd trimester
Psudo_participant_ID_47	Psudo_sample_ID_692	MR	39	-2	The 3rd trimester
Psudo_participant_ID_47	Psudo_sample_ID_691	MV	39	-2	The 3rd trimester
Psudo_participant_ID_47	Psudo_sample_ID_688	NB	NA	1	24~48 hours postpartum
Psudo_participant_ID_48	Psudo_sample_ID_707	MB	38	-11	The 3rd trimester
Psudo_participant_ID_48	Psudo_sample_ID_712	MR	35	-25	The 3rd trimester
Psudo_participant_ID_48	Psudo_sample_ID_708	MV	38	-11	The 3rd trimester
Psudo_participant_ID_48	Psudo_sample_ID_703	NB	NA	1	24~48 hours postpartum
Psudo_participant_ID_49	Psudo_sample_ID_720	MB	34	-10	The 3rd trimester
Psudo_participant_ID_49	Psudo_sample_ID_722	MR	34	-10	The 3rd trimester
Psudo_participant_ID_49	Psudo_sample_ID_724	MV	32	-22	The 3rd trimester
Psudo_participant_ID_49	Psudo_sample_ID_716	NB	NA	1	24~48 hours postpartum
Psudo_participant_ID_5	Psudo_sample_ID_64	MB	26	-58	The 2nd trimester
Psudo_participant_ID_5	Psudo_sample_ID_63	MR	36	-4	The 3rd trimester
Psudo_participant_ID_5	Psudo_sample_ID_62	MV	36	-4	The 3rd trimester
Psudo_participant_ID_5	Psudo_sample_ID_56	NS	NA	2	48~72 hours postpartum
Psudo_participant_ID_50	Psudo_sample_ID_745	MB	22	-121	The 2nd trimester
Psudo_participant_ID_50	Psudo_sample_ID_741	MR	37	-11	The 3rd trimester
Psudo_participant_ID_50	Psudo_sample_ID_737	MV	39	NA	The 3rd trimester
Psudo_participant_ID_50	Psudo_sample_ID_732	NB	NA	1	24~48 hours postpartum
Psudo_participant_ID_51	Psudo_sample_ID_753	MB	40	-1	The 3rd trimester
Psudo_participant_ID_51	Psudo_sample_ID_755	MR	40	-1	The 3rd trimester
Psudo_participant_ID_51	Psudo_sample_ID_754	MV	40	-1	The 3rd trimester
Psudo_participant_ID_51	Psudo_sample_ID_748	NB	NA	2	48~72 hours postpartum
Psudo_participant_ID_51	Psudo_sample_ID_751	NB	NA	0	0~24 hours postpartum
Psudo_participant_ID_51	Psudo_sample_ID_749	NR	NA	2	48~72 hours postpartum
Psudo_participant_ID_52	Psudo_sample_ID_771	MB	37	-16	The 3rd trimester
Psudo_participant_ID_52	Psudo_sample_ID_776	MR	29	-74	The 3rd trimester
Psudo_participant_ID_52	Psudo_sample_ID_775	MV	29	-74	The 3rd trimester
Psudo_participant_ID_52	Psudo_sample_ID_769	NS	NA	1	24~48 hours postpartum
Psudo_participant_ID_53	Psudo_sample_ID_794	MB	15	-140	The 2nd trimester
Psudo_participant_ID_53	Psudo_sample_ID_790	MR	29	-56	The 3rd trimester
Psudo_participant_ID_53	Psudo_sample_ID_789	MV	29	-56	The 3rd trimester
Psudo_participant_ID_53	Psudo_sample_ID_783	NB	NA	1	24~48 hours postpartum
Psudo_participant_ID_53	Psudo_sample_ID_784	NR	NA	1	24~48 hours postpartum
Psudo_participant_ID_53	Psudo_sample_ID_785	NS	NA	1	24~48 hours postpartum
Psudo_participant_ID_54	Psudo_sample_ID_803	MB	39	-10	The 3rd trimester
Psudo_participant_ID_54	Psudo_sample_ID_808	MR	33	-54	The 3rd trimester
Psudo_participant_ID_54	Psudo_sample_ID_804	MV	39	-10	The 3rd trimester
Psudo_participant_ID_54	Psudo_sample_ID_797	NS	NA	2	48~72 hours postpartum
Psudo_participant_ID_55	Psudo_sample_ID_819	MB	39	-1	The 3rd trimester
Psudo_participant_ID_55	Psudo_sample_ID_821	MR	39	-1	The 3rd trimester
Psudo_participant_ID_55	Psudo_sample_ID_820	MV	39	-1	The 3rd trimester
Psudo_participant_ID_55	Psudo_sample_ID_817	NB	NA	0	0~24 hours postpartum
Psudo_participant_ID_55	Psudo_sample_ID_818	NB	NA	1	24~48 hours postpartum
Psudo_participant_ID_56	Psudo_sample_ID_838	MB	38	-7	The 3rd trimester
Psudo_participant_ID_56	Psudo_sample_ID_840	MR	38	-7	The 3rd trimester
Psudo_participant_ID_56	Psudo_sample_ID_839	MV	38	-7	The 3rd trimester
Psudo_participant_ID_56	Psudo_sample_ID_836	NR	NA	1	24~48 hours postpartum
Psudo_participant_ID_56	Psudo_sample_ID_834	NS	NA	1	24~48 hours postpartum
Psudo_participant_ID_58	Psudo_sample_ID_879	MB	41	NA	The 3rd trimester
Psudo_participant_ID_58	Psudo_sample_ID_881	MR	41	NA	The 3rd trimester
Psudo_participant_ID_58	Psudo_sample_ID_880	MV	41	NA	The 3rd trimester
Psudo_participant_ID_58	Psudo_sample_ID_874	NB	NA	1	24~48 hours postpartum
Psudo_participant_ID_58	Psudo_sample_ID_875	NR	NA	1	24~48 hours postpartum
Psudo_participant_ID_58	Psudo_sample_ID_873	NS	NA	2	48~72 hours postpartum
Psudo_participant_ID_6	Psudo_sample_ID_73	MB	40	NA	The 3rd trimester
Psudo_participant_ID_6	Psudo_sample_ID_76	MR	38	-15	The 3rd trimester
Psudo_participant_ID_6	Psudo_sample_ID_75	MV	38	-15	The 3rd trimester
Psudo_participant_ID_6	Psudo_sample_ID_69	NB	NA	2	48~72 hours postpartum
Psudo_participant_ID_6	Psudo_sample_ID_70	NR	NA	2	48~72 hours postpartum
Psudo_participant_ID_60	Psudo_sample_ID_911	MB	35	-30	The 3rd trimester
Psudo_participant_ID_60	Psudo_sample_ID_910	MR	35	-25	The 3rd trimester
Psudo_participant_ID_60	Psudo_sample_ID_909	MV	35	-25	The 3rd trimester
Psudo_participant_ID_60	Psudo_sample_ID_907	NR	NA	2	48~72 hours postpartum
Psudo_participant_ID_60	Psudo_sample_ID_905	NS	NA	2	48~72 hours postpartum
Psudo_participant_ID_63	Psudo_sample_ID_965	MB	39	NA	The 3rd trimester
Psudo_participant_ID_63	Psudo_sample_ID_967	MR	39	NA	The 3rd trimester
Psudo_participant_ID_63	Psudo_sample_ID_966	MV	39	NA	The 3rd trimester
Psudo_participant_ID_63	Psudo_sample_ID_960	NB	NA	1	24~48 hours postpartum
Psudo_participant_ID_64	Psudo_sample_ID_986	MB	40	-8	The 3rd trimester
Psudo_participant_ID_64	Psudo_sample_ID_988	MR	40	-8	The 3rd trimester
Psudo_participant_ID_64	Psudo_sample_ID_985	MV	41	-1	The 3rd trimester
Psudo_participant_ID_64	Psudo_sample_ID_983	NR	NA	1	24~48 hours postpartum
Psudo_participant_ID_65	Psudo_sample_ID_1015	MB	32	-49	The 3rd trimester
Psudo_participant_ID_65	Psudo_sample_ID_1014	MR	36	-21	The 3rd trimester
Psudo_participant_ID_65	Psudo_sample_ID_1010	MV	39	-1	The 3rd trimester
Psudo_participant_ID_65	Psudo_sample_ID_1003	NB	NA	2	48~72 hours postpartum
Psudo_participant_ID_65	Psudo_sample_ID_1007	NB	NA	0	0~24 hours postpartum
Psudo_participant_ID_65	Psudo_sample_ID_1004	NR	NA	2	48~72 hours postpartum
Psudo_participant_ID_65	Psudo_sample_ID_1005	NS	NA	2	48~72 hours postpartum
Psudo_participant_ID_65	Psudo_sample_ID_1006	NS	NA	1	24~48 hours postpartum
Psudo_participant_ID_66	Psudo_sample_ID_1031	MB	37	-15	The 3rd trimester
Psudo_participant_ID_66	Psudo_sample_ID_1033	MR	37	-15	The 3rd trimester
Psudo_participant_ID_66	Psudo_sample_ID_1032	MV	37	-15	The 3rd trimester
Psudo_participant_ID_66	Psudo_sample_ID_1025	NB	NA	2	48~72 hours postpartum
Psudo_participant_ID_66	Psudo_sample_ID_1024	NS	NA	2	48~72 hours postpartum
Psudo_participant_ID_69	Psudo_sample_ID_1056	NB	NA	1	24~48 hours postpartum
Psudo_participant_ID_70	Psudo_sample_ID_1064	MB	38	-14	The 3rd trimester
Psudo_participant_ID_70	Psudo_sample_ID_1066	MR	38	-14	The 3rd trimester
Psudo_participant_ID_70	Psudo_sample_ID_1068	MV	31	-68	The 3rd trimester
Psudo_participant_ID_70	Psudo_sample_ID_1061	NR	NA	1	24~48 hours postpartum
Psudo_participant_ID_70	Psudo_sample_ID_1063	NR	NA	0	0~24 hours postpartum
Psudo_participant_ID_71	Psudo_sample_ID_1083	MB	35	-6	The 3rd trimester
Psudo_participant_ID_71	Psudo_sample_ID_1084	MV	35	-6	The 3rd trimester
Psudo_participant_ID_71	Psudo_sample_ID_1080	NR	NA	1	24~48 hours postpartum
Psudo_participant_ID_72	Psudo_sample_ID_1095	MB	37	-10	The 3rd trimester
Psudo_participant_ID_72	Psudo_sample_ID_1094	MR	38	-3	The 3rd trimester
Psudo_participant_ID_72	Psudo_sample_ID_1093	MV	38	-3	The 3rd trimester
Psudo_participant_ID_72	Psudo_sample_ID_1088	NB	NA	1	24~48 hours postpartum
Psudo_participant_ID_72	Psudo_sample_ID_1091	NR	NA	0	0~24 hours postpartum
Psudo_participant_ID_73	Psudo_sample_ID_1110	MB	26	-64	The 2nd trimester
Psudo_participant_ID_73	Psudo_sample_ID_1109	MR	35	-1	The 3rd trimester
Psudo_participant_ID_73	Psudo_sample_ID_1108	MV	35	-1	The 3rd trimester
Psudo_participant_ID_73	Psudo_sample_ID_1104	NB	NA	1	24~48 hours postpartum
Psudo_participant_ID_73	Psudo_sample_ID_1106	NB	NA	0	0~24 hours postpartum
Psudo_participant_ID_73	Psudo_sample_ID_1105	NR	NA	1	24~48 hours postpartum
Psudo_participant_ID_73	Psudo_sample_ID_1107	NR	NA	0	0~24 hours postpartum
Psudo_participant_ID_74	Psudo_sample_ID_1123	MB	36	-32	The 3rd trimester
Psudo_participant_ID_74	Psudo_sample_ID_1122	MR	41	-1	The 3rd trimester
Psudo_participant_ID_74	Psudo_sample_ID_1121	MV	41	-1	The 3rd trimester
Psudo_participant_ID_74	Psudo_sample_ID_1119	NR	NA	0	0~24 hours postpartum
Psudo_participant_ID_77	Psudo_sample_ID_1165	MB	34	-12	The 3rd trimester
Psudo_participant_ID_77	Psudo_sample_ID_1167	MR	34	-12	The 3rd trimester
Psudo_participant_ID_77	Psudo_sample_ID_1166	MV	34	-12	The 3rd trimester
Psudo_participant_ID_77	Psudo_sample_ID_1161	NS	NA	1	24~48 hours postpartum
Psudo_participant_ID_79	Psudo_sample_ID_1196	MB	35	-1	The 3rd trimester
Psudo_participant_ID_79	Psudo_sample_ID_1198	MR	35	-1	The 3rd trimester
Psudo_participant_ID_79	Psudo_sample_ID_1197	MV	35	-1	The 3rd trimester
Psudo_participant_ID_79	Psudo_sample_ID_1192	NB	NA	2	48~72 hours postpartum
Psudo_participant_ID_79	Psudo_sample_ID_1195	NR	NA	0	0~24 hours postpartum
Psudo_participant_ID_80	Psudo_sample_ID_1204	MB	39	-1	The 3rd trimester
Psudo_participant_ID_80	Psudo_sample_ID_1212	MR	38	-10	The 3rd trimester
Psudo_participant_ID_80	Psudo_sample_ID_1205	MV	39	-1	The 3rd trimester
Psudo_participant_ID_80	Psudo_sample_ID_1202	NB	NA	1	24~48 hours postpartum
Psudo_participant_ID_80	Psudo_sample_ID_1203	NR	NA	1	24~48 hours postpartum
Psudo_participant_ID_80	Psudo_sample_ID_1199	NS	NA	1	24~48 hours postpartum
Psudo_participant_ID_81	Psudo_sample_ID_1218	MB	36	-27	The 3rd trimester
Psudo_participant_ID_81	Psudo_sample_ID_1223	MR	32	-74	The 3rd trimester
Psudo_participant_ID_81	Psudo_sample_ID_1219	MV	36	-27	The 3rd trimester
Psudo_participant_ID_81	Psudo_sample_ID_1214	NB	NA	2	48~72 hours postpartum
Psudo_participant_ID_81	Psudo_sample_ID_1216	NB	NA	0	0~24 hours postpartum
Psudo_participant_ID_83	Psudo_sample_ID_1240	MB	40	-1	The 3rd trimester
Psudo_participant_ID_83	Psudo_sample_ID_1245	MR	37	-24	The 3rd trimester
Psudo_participant_ID_83	Psudo_sample_ID_1241	MV	40	-1	The 3rd trimester
Psudo_participant_ID_83	Psudo_sample_ID_1238	NB	NA	0	0~24 hours postpartum
Psudo_participant_ID_84	Psudo_sample_ID_1261	MB	37	-15	The 3rd trimester
Psudo_participant_ID_84	Psudo_sample_ID_1260	MR	40	NA	The 3rd trimester
Psudo_participant_ID_84	Psudo_sample_ID_1262	MV	37	-15	The 3rd trimester
Psudo_participant_ID_84	Psudo_sample_ID_1255	NB	NA	2	48~72 hours postpartum
Psudo_participant_ID_84	Psudo_sample_ID_1256	NR	NA	2	48~72 hours postpartum
Psudo_participant_ID_85	Psudo_sample_ID_1273	MB	26	-20	The 2nd trimester
Psudo_participant_ID_85	Psudo_sample_ID_1272	MR	25	-17	The 2nd trimester
Psudo_participant_ID_85	Psudo_sample_ID_1268	NB	NA	0	0~24 hours postpartum
Psudo_participant_ID_87	Psudo_sample_ID_1288	MB	39	-1	The 3rd trimester
Psudo_participant_ID_87	Psudo_sample_ID_1293	MR	36	-22	The 3rd trimester
Psudo_participant_ID_87	Psudo_sample_ID_1289	MV	39	-1	The 3rd trimester
Psudo_participant_ID_87	Psudo_sample_ID_1285	NR	NA	1	24~48 hours postpartum
Psudo_participant_ID_88	Psudo_sample_ID_1307	MB	38	-9	The 3rd trimester
Psudo_participant_ID_88	Psudo_sample_ID_1309	MR	36	-30	The 3rd trimester
Psudo_participant_ID_88	Psudo_sample_ID_1311	MV	28	-70	The 3rd trimester
Psudo_participant_ID_88	Psudo_sample_ID_1304	NR	NA	1	24~48 hours postpartum
Psudo_participant_ID_88	Psudo_sample_ID_1306	NR	NA	0	0~24 hours postpartum
Psudo_participant_ID_9	Psudo_sample_ID_106	MB	40	-4	The 3rd trimester
Psudo_participant_ID_9	Psudo_sample_ID_108	MR	40	-4	The 3rd trimester
Psudo_participant_ID_9	Psudo_sample_ID_107	MV	40	-4	The 3rd trimester
Psudo_participant_ID_9	Psudo_sample_ID_105	NR	NA	0	0~24 hours postpartum
Psudo_participant_ID_92	Psudo_sample_ID_1366	MB	29	-6	The 3rd trimester
Psudo_participant_ID_92	Psudo_sample_ID_1369	MR	26	-25	The 2nd trimester
Psudo_participant_ID_92	Psudo_sample_ID_1367	MV	29	-6	The 3rd trimester
Psudo_participant_ID_92	Psudo_sample_ID_1362	NB	NA	2	48~72 hours postpartum
Psudo_participant_ID_93	Psudo_sample_ID_1375	MB	29	-35	The 3rd trimester
Psudo_participant_ID_93	Psudo_sample_ID_1377	MR	29	-35	The 3rd trimester
Psudo_participant_ID_93	Psudo_sample_ID_1376	MV	29	-35	The 3rd trimester
Psudo_participant_ID_93	Psudo_sample_ID_1373	NB	NA	1	24~48 hours postpartum
Psudo_participant_ID_93	Psudo_sample_ID_1372	NR	NA	2	48~72 hours postpartum
Psudo_participant_ID_94	Psudo_sample_ID_1391	MB	39	NA	The 3rd trimester
Psudo_participant_ID_94	Psudo_sample_ID_1393	MR	39	NA	The 3rd trimester
Psudo_participant_ID_94	Psudo_sample_ID_1392	MV	39	NA	The 3rd trimester
Psudo_participant_ID_94	Psudo_sample_ID_1387	NB	NA	0	0~24 hours postpartum
Psudo_participant_ID_94	Psudo_sample_ID_1388	NR	NA	0	0~24 hours postpartum
Psudo_participant_ID_95	Psudo_sample_ID_1405	MB	41	NA	The 3rd trimester
Psudo_participant_ID_95	Psudo_sample_ID_1407	MR	41	NA	The 3rd trimester
Psudo_participant_ID_95	Psudo_sample_ID_1406	MV	41	NA	The 3rd trimester
Psudo_participant_ID_95	Psudo_sample_ID_1401	NB	NA	1	24~48 hours postpartum
Psudo_participant_ID_95	Psudo_sample_ID_1402	NR	NA	1	24~48 hours postpartum
Psudo_participant_ID_95	Psudo_sample_ID_1404	NR	NA	0	0~24 hours postpartum
Psudo_participant_ID_96	Psudo_sample_ID_1421	MB	25	-104	The 2nd trimester
Psudo_participant_ID_96	Psudo_sample_ID_1423	MR	25	-104	The 2nd trimester
Psudo_participant_ID_96	Psudo_sample_ID_1422	MV	25	-104	The 2nd trimester
Psudo_participant_ID_96	Psudo_sample_ID_1417	NB	NA	1	24~48 hours postpartum
Psudo_participant_ID_96	Psudo_sample_ID_1418	NR	NA	1	24~48 hours postpartum
Psudo_participant_ID_97	Psudo_sample_ID_1432	MB	37	-21	The 3rd trimester
Psudo_participant_ID_97	Psudo_sample_ID_1431	MR	39	-6	The 3rd trimester
Psudo_participant_ID_97	Psudo_sample_ID_1430	MV	39	-6	The 3rd trimester
Psudo_participant_ID_97	Psudo_sample_ID_1424	NR	NA	1	24~48 hours postpartum
Psudo_participant_ID_98	Psudo_sample_ID_1451	MB	36	-4	The 3rd trimester
Psudo_participant_ID_98	Psudo_sample_ID_1453	MR	36	-4	The 3rd trimester
Psudo_participant_ID_98	Psudo_sample_ID_1452	MV	36	-4	The 3rd trimester
Psudo_participant_ID_98	Psudo_sample_ID_1446	NB	NA	1	24~48 hours postpartum
Psudo_participant_ID_98	Psudo_sample_ID_1450	NR	NA	0	0~24 hours postpartum

## Sheet: Sheet 2
Sample number	161	158	161	36	76	34	26	53	24	0	43	23
Participant_ID (matched with metadata)	Sample_ID_MB	Sample_ID_MR	Sample_ID_MV	Sample_ID_NB_day_0	Sample_ID_NB_day_1	Sample_ID_NB_day_2	Sample_ID_NR_day_0	Sample_ID_NR_day_1	Sample_ID_NR_day_2	Sample_ID_NS_day_0	Sample_ID_NS_day_1	Sample_ID_NS_day_2
Psudo_participant_ID_100	Psudo_sample_ID_1479	Psudo_sample_ID_1483	Psudo_sample_ID_1480	NA	NA	NA	NA	NA	NA	NA	Psudo_sample_ID_1477	NA
Psudo_participant_ID_102	Psudo_sample_ID_1513	Psudo_sample_ID_1515	Psudo_sample_ID_1514	NA	Psudo_sample_ID_1508	NA	NA	NA	NA	NA	Psudo_sample_ID_1510	NA
Psudo_participant_ID_103	Psudo_sample_ID_1534	Psudo_sample_ID_1538	Psudo_sample_ID_1535	NA	NA	Psudo_sample_ID_1528	NA	NA	NA	NA	Psudo_sample_ID_1531	Psudo_sample_ID_1530
Psudo_participant_ID_104	Psudo_sample_ID_1556	Psudo_sample_ID_1554	Psudo_sample_ID_1553	NA	NA	NA	NA	NA	Psudo_sample_ID_1548	NA	NA	Psudo_sample_ID_1549
Psudo_participant_ID_106	Psudo_sample_ID_1575	Psudo_sample_ID_1577	Psudo_sample_ID_1576	NA	NA	Psudo_sample_ID_1570	NA	NA	NA	NA	NA	Psudo_sample_ID_1572
Psudo_participant_ID_107	Psudo_sample_ID_1595	Psudo_sample_ID_1596	Psudo_sample_ID_1598	NA	NA	NA	NA	Psudo_sample_ID_1592	NA	NA	NA	NA
Psudo_participant_ID_108	Psudo_sample_ID_1609	Psudo_sample_ID_1611	Psudo_sample_ID_1610	NA	Psudo_sample_ID_1605	NA	NA	NA	NA	NA	Psudo_sample_ID_1604	Psudo_sample_ID_1603
Psudo_participant_ID_109	Psudo_sample_ID_1627	Psudo_sample_ID_1626	Psudo_sample_ID_1628	Psudo_sample_ID_1623	NA	NA	NA	NA	NA	NA	NA	NA
Psudo_participant_ID_11	Psudo_sample_ID_134	NA	Psudo_sample_ID_133	Psudo_sample_ID_131	Psudo_sample_ID_130	NA	NA	NA	NA	NA	Psudo_sample_ID_129	NA
Psudo_participant_ID_110	Psudo_sample_ID_1641	Psudo_sample_ID_1640	Psudo_sample_ID_1639	NA	NA	NA	NA	NA	NA	NA	Psudo_sample_ID_1633	NA
Psudo_participant_ID_112	NA	NA	Psudo_sample_ID_1660	NA	Psudo_sample_ID_1655	NA	Psudo_sample_ID_1659	Psudo_sample_ID_1656	NA	NA	NA	NA
Psudo_participant_ID_113	Psudo_sample_ID_1668	Psudo_sample_ID_1670	Psudo_sample_ID_1669	Psudo_sample_ID_1667	NA	NA	NA	Psudo_sample_ID_1666	NA	NA	NA	NA
Psudo_participant_ID_115	Psudo_sample_ID_1696	Psudo_sample_ID_1698	Psudo_sample_ID_1697	Psudo_sample_ID_1694	Psudo_sample_ID_1692	NA	NA	NA	NA	NA	NA	NA
Psudo_participant_ID_116	Psudo_sample_ID_1722	Psudo_sample_ID_1724	Psudo_sample_ID_1723	NA	Psudo_sample_ID_1720	NA	NA	NA	NA	NA	Psudo_sample_ID_1717	NA
Psudo_participant_ID_117	Psudo_sample_ID_1736	Psudo_sample_ID_1738	Psudo_sample_ID_1737	Psudo_sample_ID_1734	Psudo_sample_ID_1732	NA	NA	NA	NA	NA	NA	NA
Psudo_participant_ID_119	Psudo_sample_ID_1766	Psudo_sample_ID_1765	Psudo_sample_ID_1764	Psudo_sample_ID_1760	Psudo_sample_ID_1758	NA	NA	Psudo_sample_ID_1759	NA	NA	NA	NA
Psudo_participant_ID_12	Psudo_sample_ID_139	Psudo_sample_ID_144	Psudo_sample_ID_140	Psudo_sample_ID_138	NA	NA	NA	NA	NA	NA	NA	NA
Psudo_participant_ID_120	Psudo_sample_ID_1780	Psudo_sample_ID_1782	Psudo_sample_ID_1781	Psudo_sample_ID_1778	Psudo_sample_ID_1776	NA	NA	NA	NA	NA	Psudo_sample_ID_1775	NA
Psudo_participant_ID_124	Psudo_sample_ID_1835	Psudo_sample_ID_1837	Psudo_sample_ID_1836	NA	Psudo_sample_ID_1834	NA	NA	NA	NA	NA	NA	NA
Psudo_participant_ID_125	Psudo_sample_ID_1856	Psudo_sample_ID_1861	Psudo_sample_ID_1857	NA	NA	Psudo_sample_ID_1850	NA	NA	NA	NA	NA	NA
Psudo_participant_ID_126	Psudo_sample_ID_1869	Psudo_sample_ID_1871	Psudo_sample_ID_1870	NA	NA	Psudo_sample_ID_1864	NA	NA	NA	NA	NA	NA
Psudo_participant_ID_129	Psudo_sample_ID_1894	Psudo_sample_ID_1896	Psudo_sample_ID_1892	Psudo_sample_ID_1889	NA	NA	NA	Psudo_sample_ID_1888	NA	NA	NA	NA
Psudo_participant_ID_130	Psudo_sample_ID_1908	Psudo_sample_ID_1910	Psudo_sample_ID_1903	NA	Psudo_sample_ID_1898	NA	NA	NA	NA	NA	NA	NA
Psudo_participant_ID_131	Psudo_sample_ID_1919	Psudo_sample_ID_1924	Psudo_sample_ID_1921	NA	NA	Psudo_sample_ID_1914	NA	Psudo_sample_ID_1918	Psudo_sample_ID_1915	NA	Psudo_sample_ID_1916	Psudo_sample_ID_1913
Psudo_participant_ID_132	Psudo_sample_ID_1939	Psudo_sample_ID_1941	Psudo_sample_ID_1940	NA	NA	Psudo_sample_ID_1934	NA	NA	Psudo_sample_ID_1935	NA	NA	NA
Psudo_participant_ID_133	Psudo_sample_ID_1956	Psudo_sample_ID_1958	Psudo_sample_ID_1960	NA	NA	NA	Psudo_sample_ID_1955	NA	NA	NA	NA	Psudo_sample_ID_1951
Psudo_participant_ID_135	Psudo_sample_ID_1994	Psudo_sample_ID_1996	Psudo_sample_ID_1992	NA	NA	NA	Psudo_sample_ID_1990	NA	NA	NA	NA	NA
Psudo_participant_ID_136	Psudo_sample_ID_2008	Psudo_sample_ID_2010	Psudo_sample_ID_2006	NA	NA	Psudo_sample_ID_2001	NA	NA	Psudo_sample_ID_2002	NA	NA	NA
Psudo_participant_ID_138	Psudo_sample_ID_2047	Psudo_sample_ID_2049	Psudo_sample_ID_2048	NA	NA	NA	NA	Psudo_sample_ID_2046	Psudo_sample_ID_2043	NA	NA	NA
Psudo_participant_ID_14	Psudo_sample_ID_178	Psudo_sample_ID_180	Psudo_sample_ID_179	NA	Psudo_sample_ID_173	NA	NA	NA	NA	NA	NA	NA
Psudo_participant_ID_140	Psudo_sample_ID_2075	Psudo_sample_ID_2077	Psudo_sample_ID_2073	NA	NA	Psudo_sample_ID_2069	NA	NA	NA	NA	NA	NA
Psudo_participant_ID_141	Psudo_sample_ID_2088	Psudo_sample_ID_2090	Psudo_sample_ID_2089	Psudo_sample_ID_2086	NA	NA	NA	NA	NA	NA	NA	NA
Psudo_participant_ID_142	Psudo_sample_ID_2106	Psudo_sample_ID_2111	Psudo_sample_ID_2107	NA	NA	NA	Psudo_sample_ID_2105	NA	NA	NA	NA	NA
Psudo_participant_ID_143	Psudo_sample_ID_2124	Psudo_sample_ID_2132	Psudo_sample_ID_2125	NA	NA	Psudo_sample_ID_2119	NA	NA	Psudo_sample_ID_2120	NA	Psudo_sample_ID_2121	NA
Psudo_participant_ID_144	Psudo_sample_ID_2143	Psudo_sample_ID_2142	Psudo_sample_ID_2141	NA	Psudo_sample_ID_2136	NA	NA	NA	NA	NA	NA	NA
Psudo_participant_ID_146	Psudo_sample_ID_2176	Psudo_sample_ID_2178	Psudo_sample_ID_2177	NA	Psudo_sample_ID_2171	NA	Psudo_sample_ID_2175	Psudo_sample_ID_2172	NA	NA	NA	NA
Psudo_participant_ID_149	Psudo_sample_ID_2220	Psudo_sample_ID_2222	Psudo_sample_ID_2221	NA	Psudo_sample_ID_2216	NA	NA	Psudo_sample_ID_2217	NA	NA	Psudo_sample_ID_2215	NA
Psudo_participant_ID_152	Psudo_sample_ID_2270	Psudo_sample_ID_2272	Psudo_sample_ID_2271	NA	NA	NA	NA	Psudo_sample_ID_2269	NA	NA	NA	NA
Psudo_participant_ID_153	Psudo_sample_ID_2290	Psudo_sample_ID_2289	Psudo_sample_ID_2288	NA	Psudo_sample_ID_2283	NA	NA	Psudo_sample_ID_2284	NA	NA	Psudo_sample_ID_2282	NA
Psudo_participant_ID_154	Psudo_sample_ID_2306	Psudo_sample_ID_2305	Psudo_sample_ID_2304	NA	Psudo_sample_ID_2301	Psudo_sample_ID_2299	NA	NA	NA	NA	NA	NA
Psudo_participant_ID_155	Psudo_sample_ID_2320	Psudo_sample_ID_2322	Psudo_sample_ID_2321	NA	NA	Psudo_sample_ID_2315	NA	NA	Psudo_sample_ID_2316	NA	Psudo_sample_ID_2317	NA
Psudo_participant_ID_156	Psudo_sample_ID_2340	Psudo_sample_ID_2342	Psudo_sample_ID_2341	NA	Psudo_sample_ID_2336	NA	NA	NA	NA	NA	NA	Psudo_sample_ID_2335
Psudo_participant_ID_157	Psudo_sample_ID_2351	Psudo_sample_ID_2353	Psudo_sample_ID_2352	NA	NA	NA	NA	Psudo_sample_ID_2347	NA	NA	NA	NA
Psudo_participant_ID_159	Psudo_sample_ID_2397	Psudo_sample_ID_2399	Psudo_sample_ID_2394	NA	Psudo_sample_ID_2388	NA	NA	NA	NA	NA	NA	NA
Psudo_participant_ID_16	Psudo_sample_ID_208	Psudo_sample_ID_210	Psudo_sample_ID_209	NA	NA	NA	NA	Psudo_sample_ID_205	NA	NA	NA	NA
Psudo_participant_ID_160	Psudo_sample_ID_2415	Psudo_sample_ID_2417	Psudo_sample_ID_2413	NA	NA	Psudo_sample_ID_2409	NA	NA	Psudo_sample_ID_2410	NA	NA	NA
Psudo_participant_ID_161	Psudo_sample_ID_2437	Psudo_sample_ID_2430	Psudo_sample_ID_2429	Psudo_sample_ID_2426	Psudo_sample_ID_2424	NA	NA	NA	NA	NA	NA	NA
Psudo_participant_ID_163	Psudo_sample_ID_2468	Psudo_sample_ID_2469	Psudo_sample_ID_2471	NA	Psudo_sample_ID_2464	NA	NA	NA	NA	NA	NA	NA
Psudo_participant_ID_164	Psudo_sample_ID_2480	Psudo_sample_ID_2482	Psudo_sample_ID_2481	NA	Psudo_sample_ID_2476	NA	NA	Psudo_sample_ID_2477	NA	NA	NA	NA
Psudo_participant_ID_166	Psudo_sample_ID_2518	Psudo_sample_ID_2523	Psudo_sample_ID_2519	NA	Psudo_sample_ID_2514	NA	NA	NA	NA	NA	NA	NA
Psudo_participant_ID_167	Psudo_sample_ID_2534	Psudo_sample_ID_2539	Psudo_sample_ID_2535	NA	NA	NA	NA	Psudo_sample_ID_2531	NA	NA	NA	NA
Psudo_participant_ID_168	Psudo_sample_ID_2549	Psudo_sample_ID_2551	Psudo_sample_ID_2550	NA	Psudo_sample_ID_2544	NA	NA	NA	NA	NA	Psudo_sample_ID_2543	NA
Psudo_participant_ID_169	Psudo_sample_ID_2569	Psudo_sample_ID_2577	Psudo_sample_ID_2570	NA	Psudo_sample_ID_2565	NA	NA	NA	NA	NA	NA	NA
Psudo_participant_ID_170	Psudo_sample_ID_2592	Psudo_sample_ID_2594	Psudo_sample_ID_2593	NA	Psudo_sample_ID_2588	NA	NA	Psudo_sample_ID_2589	NA	NA	NA	NA
Psudo_participant_ID_171	Psudo_sample_ID_2608	Psudo_sample_ID_2610	Psudo_sample_ID_2609	Psudo_sample_ID_2606	Psudo_sample_ID_2604	NA	NA	NA	NA	NA	NA	NA
Psudo_participant_ID_172	Psudo_sample_ID_2623	Psudo_sample_ID_2625	Psudo_sample_ID_2624	NA	NA	Psudo_sample_ID_2617	Psudo_sample_ID_2622	NA	Psudo_sample_ID_2618	NA	NA	NA
Psudo_participant_ID_173	Psudo_sample_ID_2642	NA	Psudo_sample_ID_2643	NA	NA	NA	NA	NA	NA	NA	Psudo_sample_ID_2640	Psudo_sample_ID_2639
Psudo_participant_ID_174	Psudo_sample_ID_2651	Psudo_sample_ID_2653	Psudo_sample_ID_2652	Psudo_sample_ID_2649	NA	NA	NA	Psudo_sample_ID_2648	NA	NA	NA	NA
Psudo_participant_ID_175	Psudo_sample_ID_2674	Psudo_sample_ID_2676	Psudo_sample_ID_2675	NA	Psudo_sample_ID_2670	NA	NA	Psudo_sample_ID_2671	NA	NA	NA	NA
Psudo_participant_ID_178	Psudo_sample_ID_2711	Psudo_sample_ID_2713	Psudo_sample_ID_2712	Psudo_sample_ID_2709	NA	NA	NA	NA	NA	NA	NA	NA
Psudo_participant_ID_18	Psudo_sample_ID_237	Psudo_sample_ID_239	Psudo_sample_ID_238	NA	Psudo_sample_ID_233	NA	NA	Psudo_sample_ID_234	NA	NA	NA	Psudo_sample_ID_232
Psudo_participant_ID_180	Psudo_sample_ID_2747	Psudo_sample_ID_2744	Psudo_sample_ID_2743	NA	NA	NA	NA	Psudo_sample_ID_2740	NA	NA	NA	NA
Psudo_participant_ID_181	Psudo_sample_ID_2759	Psudo_sample_ID_2761	Psudo_sample_ID_2763	NA	NA	NA	NA	NA	Psudo_sample_ID_2755	NA	NA	NA
Psudo_participant_ID_182	Psudo_sample_ID_2779	Psudo_sample_ID_2781	Psudo_sample_ID_2786	NA	Psudo_sample_ID_2775	NA	NA	NA	NA	NA	NA	NA
Psudo_participant_ID_183	Psudo_sample_ID_2796	Psudo_sample_ID_2798	Psudo_sample_ID_2797	NA	Psudo_sample_ID_2792	NA	NA	NA	NA	NA	NA	NA
Psudo_participant_ID_184	Psudo_sample_ID_2815	Psudo_sample_ID_2817	Psudo_sample_ID_2816	NA	Psudo_sample_ID_2811	NA	NA	NA	NA	NA	NA	NA
Psudo_participant_ID_185	Psudo_sample_ID_2836	Psudo_sample_ID_2839	Psudo_sample_ID_2838	NA	Psudo_sample_ID_2832	NA	NA	NA	NA	NA	Psudo_sample_ID_2831	Psudo_sample_ID_2830
Psudo_participant_ID_186	Psudo_sample_ID_2854	Psudo_sample_ID_2853	Psudo_sample_ID_2852	NA	Psudo_sample_ID_2847	NA	NA	NA	NA	NA	NA	NA
Psudo_participant_ID_187	Psudo_sample_ID_2867	Psudo_sample_ID_2873	Psudo_sample_ID_2868	Psudo_sample_ID_2865	Psudo_sample_ID_2863	NA	NA	Psudo_sample_ID_2864	NA	NA	NA	NA
Psudo_participant_ID_188	Psudo_sample_ID_2880	Psudo_sample_ID_2882	Psudo_sample_ID_2881	NA	NA	Psudo_sample_ID_2875	NA	NA	NA	NA	Psudo_sample_ID_2877	Psudo_sample_ID_2874
Psudo_participant_ID_189	Psudo_sample_ID_2904	Psudo_sample_ID_2903	Psudo_sample_ID_2902	NA	Psudo_sample_ID_2898	NA	Psudo_sample_ID_2901	Psudo_sample_ID_2899	NA	NA	Psudo_sample_ID_2897	NA
Psudo_participant_ID_19	Psudo_sample_ID_249	Psudo_sample_ID_251	NA	NA	Psudo_sample_ID_246	NA	NA	Psudo_sample_ID_247	NA	NA	NA	NA
Psudo_participant_ID_191	Psudo_sample_ID_2926	Psudo_sample_ID_2928	Psudo_sample_ID_2927	NA	Psudo_sample_ID_2922	NA	NA	NA	NA	NA	NA	NA
Psudo_participant_ID_192	Psudo_sample_ID_2944	Psudo_sample_ID_2946	Psudo_sample_ID_2945	NA	Psudo_sample_ID_2938	NA	Psudo_sample_ID_2943	Psudo_sample_ID_2939	NA	NA	Psudo_sample_ID_2941	NA
Psudo_participant_ID_193	Psudo_sample_ID_2959	Psudo_sample_ID_2958	Psudo_sample_ID_2960	NA	NA	Psudo_sample_ID_2954	NA	Psudo_sample_ID_2957	Psudo_sample_ID_2955	NA	NA	Psudo_sample_ID_2953
Psudo_participant_ID_194	Psudo_sample_ID_2975	Psudo_sample_ID_2977	Psudo_sample_ID_2976	NA	Psudo_sample_ID_2971	NA	NA	Psudo_sample_ID_2972	NA	NA	Psudo_sample_ID_2970	NA
Psudo_participant_ID_195	Psudo_sample_ID_2993	Psudo_sample_ID_2995	Psudo_sample_ID_2994	NA	Psudo_sample_ID_2988	NA	NA	NA	NA	NA	NA	NA
Psudo_participant_ID_196	Psudo_sample_ID_3007	Psudo_sample_ID_3006	Psudo_sample_ID_3005	NA	Psudo_sample_ID_3001	NA	NA	NA	NA	NA	NA	NA
Psudo_participant_ID_197	Psudo_sample_ID_3026	Psudo_sample_ID_3028	Psudo_sample_ID_3027	NA	NA	NA	NA	Psudo_sample_ID_3023	NA	NA	NA	NA
Psudo_participant_ID_199	Psudo_sample_ID_3057	Psudo_sample_ID_3061	Psudo_sample_ID_3056	NA	Psudo_sample_ID_3050	NA	NA	NA	NA	NA	Psudo_sample_ID_3052	NA
Psudo_participant_ID_2	Psudo_sample_ID_15	Psudo_sample_ID_21	Psudo_sample_ID_20	NA	NA	Psudo_sample_ID_11	NA	NA	NA	NA	NA	NA
Psudo_participant_ID_20	Psudo_sample_ID_262	Psudo_sample_ID_264	Psudo_sample_ID_263	NA	Psudo_sample_ID_257	NA	NA	Psudo_sample_ID_258	NA	NA	NA	NA
Psudo_participant_ID_200	Psudo_sample_ID_3073	Psudo_sample_ID_3081	Psudo_sample_ID_3074	NA	Psudo_sample_ID_3069	NA	NA	Psudo_sample_ID_3070	NA	NA	Psudo_sample_ID_3068	NA
Psudo_participant_ID_201	Psudo_sample_ID_3091	Psudo_sample_ID_3093	Psudo_sample_ID_3092	NA	NA	NA	NA	Psudo_sample_ID_3087	NA	NA	Psudo_sample_ID_3090	Psudo_sample_ID_3085
Psudo_participant_ID_202	Psudo_sample_ID_3109	Psudo_sample_ID_3108	Psudo_sample_ID_3107	Psudo_sample_ID_3105	Psudo_sample_ID_3103	NA	Psudo_sample_ID_3106	NA	NA	NA	Psudo_sample_ID_3102	NA
Psudo_participant_ID_204	Psudo_sample_ID_3150	Psudo_sample_ID_3152	Psudo_sample_ID_3151	NA	NA	Psudo_sample_ID_3146	NA	NA	Psudo_sample_ID_3147	NA	NA	NA
Psudo_participant_ID_205	Psudo_sample_ID_3167	Psudo_sample_ID_3178	Psudo_sample_ID_3168	Psudo_sample_ID_3165	NA	Psudo_sample_ID_3163	Psudo_sample_ID_3166	NA	Psudo_sample_ID_3164	NA	NA	Psudo_sample_ID_3162
Psudo_participant_ID_206	Psudo_sample_ID_3186	Psudo_sample_ID_3188	Psudo_sample_ID_3187	Psudo_sample_ID_3184	Psudo_sample_ID_3182	NA	NA	Psudo_sample_ID_3183	NA	NA	NA	NA
Psudo_participant_ID_207	Psudo_sample_ID_3216	Psudo_sample_ID_3219	Psudo_sample_ID_3218	NA	NA	NA	Psudo_sample_ID_3215	NA	NA	NA	NA	NA
Psudo_participant_ID_208	Psudo_sample_ID_3234	Psudo_sample_ID_3236	Psudo_sample_ID_3235	NA	NA	NA	NA	NA	NA	NA	Psudo_sample_ID_3231	NA
Psudo_participant_ID_209	Psudo_sample_ID_3251	Psudo_sample_ID_3253	Psudo_sample_ID_3252	NA	Psudo_sample_ID_3247	NA	NA	NA	NA	NA	NA	NA
Psudo_participant_ID_21	Psudo_sample_ID_285	Psudo_sample_ID_281	Psudo_sample_ID_280	NA	NA	NA	NA	Psudo_sample_ID_276	NA	NA	Psudo_sample_ID_277	NA
Psudo_participant_ID_210	Psudo_sample_ID_3269	Psudo_sample_ID_3271	Psudo_sample_ID_3270	NA	NA	NA	NA	NA	NA	NA	NA	Psudo_sample_ID_3263
Psudo_participant_ID_211	Psudo_sample_ID_3292	Psudo_sample_ID_3294	Psudo_sample_ID_3293	NA	NA	NA	NA	Psudo_sample_ID_3288	NA	NA	Psudo_sample_ID_3289	NA
Psudo_participant_ID_213	Psudo_sample_ID_3330	Psudo_sample_ID_3332	Psudo_sample_ID_3331	NA	Psudo_sample_ID_3327	Psudo_sample_ID_3325	NA	NA	Psudo_sample_ID_3326	NA	Psudo_sample_ID_3329	NA
Psudo_participant_ID_214	Psudo_sample_ID_3351	Psudo_sample_ID_3350	Psudo_sample_ID_3349	Psudo_sample_ID_3346	Psudo_sample_ID_3342	NA	NA	NA	NA	NA	NA	NA
Psudo_participant_ID_215	Psudo_sample_ID_3371	Psudo_sample_ID_3373	Psudo_sample_ID_3372	Psudo_sample_ID_3369	NA	Psudo_sample_ID_3366	Psudo_sample_ID_3370	NA	Psudo_sample_ID_3367	NA	NA	Psudo_sample_ID_3368
Psudo_participant_ID_216	Psudo_sample_ID_3388	Psudo_sample_ID_3390	Psudo_sample_ID_3389	NA	Psudo_sample_ID_3383	NA	NA	Psudo_sample_ID_3384	NA	NA	NA	NA
Psudo_participant_ID_217	Psudo_sample_ID_3404	Psudo_sample_ID_3406	Psudo_sample_ID_3405	NA	NA	Psudo_sample_ID_3400	NA	NA	NA	NA	NA	NA
Psudo_participant_ID_218	Psudo_sample_ID_3419	Psudo_sample_ID_3421	Psudo_sample_ID_3420	NA	Psudo_sample_ID_3416	NA	NA	NA	NA	NA	NA	NA
Psudo_participant_ID_22	Psudo_sample_ID_298	Psudo_sample_ID_308	Psudo_sample_ID_302	NA	NA	Psudo_sample_ID_293	NA	NA	Psudo_sample_ID_294	NA	Psudo_sample_ID_295	NA
Psudo_participant_ID_23	Psudo_sample_ID_315	Psudo_sample_ID_325	Psudo_sample_ID_319	NA	NA	NA	NA	NA	NA	NA	Psudo_sample_ID_312	NA
Psudo_participant_ID_24	Psudo_sample_ID_330	Psudo_sample_ID_332	Psudo_sample_ID_336	NA	NA	NA	NA	NA	NA	NA	NA	Psudo_sample_ID_326
Psudo_participant_ID_25	Psudo_sample_ID_344	Psudo_sample_ID_346	Psudo_sample_ID_345	Psudo_sample_ID_343	NA	Psudo_sample_ID_341	NA	NA	NA	NA	NA	NA
Psudo_participant_ID_26	Psudo_sample_ID_361	Psudo_sample_ID_363	Psudo_sample_ID_362	NA	NA	NA	NA	Psudo_sample_ID_358	NA	NA	Psudo_sample_ID_356	NA
Psudo_participant_ID_27	NA	Psudo_sample_ID_378	Psudo_sample_ID_377	Psudo_sample_ID_374	NA	NA	Psudo_sample_ID_375	NA	NA	NA	NA	NA
Psudo_participant_ID_28	Psudo_sample_ID_396	Psudo_sample_ID_398	Psudo_sample_ID_397	NA	NA	Psudo_sample_ID_391	NA	NA	Psudo_sample_ID_392	NA	NA	NA
Psudo_participant_ID_29	Psudo_sample_ID_415	NA	NA	NA	NA	Psudo_sample_ID_411	NA	NA	NA	NA	NA	NA
Psudo_participant_ID_3	Psudo_sample_ID_37	Psudo_sample_ID_36	Psudo_sample_ID_35	NA	NA	NA	NA	Psudo_sample_ID_31	NA	NA	NA	NA
Psudo_participant_ID_31	Psudo_sample_ID_435	Psudo_sample_ID_438	Psudo_sample_ID_437	NA	NA	NA	Psudo_sample_ID_434	NA	NA	NA	Psudo_sample_ID_433	NA
Psudo_participant_ID_32	Psudo_sample_ID_454	Psudo_sample_ID_456	Psudo_sample_ID_455	Psudo_sample_ID_452	Psudo_sample_ID_449	NA	NA	NA	NA	NA	NA	NA
Psudo_participant_ID_33	Psudo_sample_ID_476	Psudo_sample_ID_478	Psudo_sample_ID_477	NA	NA	NA	NA	NA	Psudo_sample_ID_473	NA	NA	NA
Psudo_participant_ID_34	Psudo_sample_ID_501	NA	Psudo_sample_ID_502	Psudo_sample_ID_500	Psudo_sample_ID_498	NA	NA	NA	NA	NA	Psudo_sample_ID_499	NA
Psudo_participant_ID_36	Psudo_sample_ID_518	Psudo_sample_ID_520	Psudo_sample_ID_519	Psudo_sample_ID_517	Psudo_sample_ID_515	NA	NA	NA	NA	NA	NA	NA
Psudo_participant_ID_37	Psudo_sample_ID_532	Psudo_sample_ID_534	Psudo_sample_ID_533	NA	NA	Psudo_sample_ID_527	NA	NA	NA	NA	Psudo_sample_ID_529	NA
Psudo_participant_ID_38	NA	Psudo_sample_ID_553	Psudo_sample_ID_552	Psudo_sample_ID_549	NA	NA	NA	NA	NA	NA	NA	NA
Psudo_participant_ID_39	Psudo_sample_ID_563	Psudo_sample_ID_562	Psudo_sample_ID_561	Psudo_sample_ID_558	Psudo_sample_ID_556	NA	NA	Psudo_sample_ID_557	NA	NA	NA	NA
Psudo_participant_ID_4	Psudo_sample_ID_53	Psudo_sample_ID_55	Psudo_sample_ID_54	Psudo_sample_ID_51	Psudo_sample_ID_49	NA	NA	NA	NA	NA	NA	NA
Psudo_participant_ID_40	Psudo_sample_ID_577	Psudo_sample_ID_580	Psudo_sample_ID_579	NA	Psudo_sample_ID_573	NA	Psudo_sample_ID_576	Psudo_sample_ID_574	NA	NA	NA	NA
Psudo_participant_ID_42	Psudo_sample_ID_609	Psudo_sample_ID_608	Psudo_sample_ID_607	NA	Psudo_sample_ID_602	NA	NA	Psudo_sample_ID_603	NA	NA	NA	NA
Psudo_participant_ID_43	Psudo_sample_ID_623	Psudo_sample_ID_625	Psudo_sample_ID_624	NA	NA	NA	NA	NA	NA	NA	Psudo_sample_ID_620	NA
Psudo_participant_ID_44	Psudo_sample_ID_639	Psudo_sample_ID_641	Psudo_sample_ID_638	NA	Psudo_sample_ID_632	NA	NA	NA	NA	NA	Psudo_sample_ID_634	NA
Psudo_participant_ID_45	Psudo_sample_ID_658	Psudo_sample_ID_660	Psudo_sample_ID_659	NA	Psudo_sample_ID_654	NA	NA	NA	NA	NA	NA	NA
Psudo_participant_ID_46	Psudo_sample_ID_679	Psudo_sample_ID_681	Psudo_sample_ID_677	NA	NA	NA	Psudo_sample_ID_675	Psudo_sample_ID_673	NA	NA	Psudo_sample_ID_671	NA
Psudo_participant_ID_47	Psudo_sample_ID_693	Psudo_sample_ID_692	Psudo_sample_ID_691	NA	Psudo_sample_ID_688	NA	NA	NA	NA	NA	NA	NA
Psudo_participant_ID_48	Psudo_sample_ID_707	Psudo_sample_ID_712	Psudo_sample_ID_708	NA	Psudo_sample_ID_703	NA	NA	NA	NA	NA	NA	NA
Psudo_participant_ID_49	Psudo_sample_ID_720	Psudo_sample_ID_722	Psudo_sample_ID_724	NA	Psudo_sample_ID_716	NA	NA	NA	NA	NA	NA	NA
Psudo_participant_ID_5	Psudo_sample_ID_64	Psudo_sample_ID_63	Psudo_sample_ID_62	NA	NA	NA	NA	NA	NA	NA	NA	Psudo_sample_ID_56
Psudo_participant_ID_50	Psudo_sample_ID_745	Psudo_sample_ID_741	Psudo_sample_ID_737	NA	Psudo_sample_ID_732	NA	NA	NA	NA	NA	NA	NA
Psudo_participant_ID_51	Psudo_sample_ID_753	Psudo_sample_ID_755	Psudo_sample_ID_754	Psudo_sample_ID_751	NA	Psudo_sample_ID_748	NA	NA	Psudo_sample_ID_749	NA	NA	NA
Psudo_participant_ID_52	Psudo_sample_ID_771	Psudo_sample_ID_776	Psudo_sample_ID_775	NA	NA	NA	NA	NA	NA	NA	Psudo_sample_ID_769	NA
Psudo_participant_ID_53	Psudo_sample_ID_794	Psudo_sample_ID_790	Psudo_sample_ID_789	NA	Psudo_sample_ID_783	NA	NA	Psudo_sample_ID_784	NA	NA	Psudo_sample_ID_785	NA
Psudo_participant_ID_54	Psudo_sample_ID_803	Psudo_sample_ID_808	Psudo_sample_ID_804	NA	NA	NA	NA	NA	NA	NA	NA	Psudo_sample_ID_797
Psudo_participant_ID_55	Psudo_sample_ID_819	Psudo_sample_ID_821	Psudo_sample_ID_820	Psudo_sample_ID_817	Psudo_sample_ID_818	NA	NA	NA	NA	NA	NA	NA
Psudo_participant_ID_56	Psudo_sample_ID_838	Psudo_sample_ID_840	Psudo_sample_ID_839	NA	NA	NA	NA	Psudo_sample_ID_836	NA	NA	Psudo_sample_ID_834	NA
Psudo_participant_ID_58	Psudo_sample_ID_879	Psudo_sample_ID_881	Psudo_sample_ID_880	NA	Psudo_sample_ID_874	NA	NA	Psudo_sample_ID_875	NA	NA	NA	Psudo_sample_ID_873
Psudo_participant_ID_6	Psudo_sample_ID_73	Psudo_sample_ID_76	Psudo_sample_ID_75	NA	NA	Psudo_sample_ID_69	NA	NA	Psudo_sample_ID_70	NA	NA	NA
Psudo_participant_ID_60	Psudo_sample_ID_911	Psudo_sample_ID_910	Psudo_sample_ID_909	NA	NA	NA	NA	NA	Psudo_sample_ID_907	NA	NA	Psudo_sample_ID_905
Psudo_participant_ID_63	Psudo_sample_ID_965	Psudo_sample_ID_967	Psudo_sample_ID_966	NA	Psudo_sample_ID_960	NA	NA	NA	NA	NA	NA	NA
Psudo_participant_ID_64	Psudo_sample_ID_986	Psudo_sample_ID_988	Psudo_sample_ID_985	NA	NA	NA	NA	Psudo_sample_ID_983	NA	NA	NA	NA
Psudo_participant_ID_65	Psudo_sample_ID_1015	Psudo_sample_ID_1014	Psudo_sample_ID_1010	Psudo_sample_ID_1007	NA	Psudo_sample_ID_1003	NA	NA	Psudo_sample_ID_1004	NA	Psudo_sample_ID_1006	Psudo_sample_ID_1005
Psudo_participant_ID_66	Psudo_sample_ID_1031	Psudo_sample_ID_1033	Psudo_sample_ID_1032	NA	NA	Psudo_sample_ID_1025	NA	NA	NA	NA	NA	Psudo_sample_ID_1024
Psudo_participant_ID_70	Psudo_sample_ID_1064	Psudo_sample_ID_1066	Psudo_sample_ID_1068	NA	NA	NA	Psudo_sample_ID_1063	Psudo_sample_ID_1061	NA	NA	NA	NA
Psudo_participant_ID_71	Psudo_sample_ID_1083	NA	Psudo_sample_ID_1084	NA	NA	NA	NA	Psudo_sample_ID_1080	NA	NA	NA	NA
Psudo_participant_ID_72	Psudo_sample_ID_1095	Psudo_sample_ID_1094	Psudo_sample_ID_1093	NA	Psudo_sample_ID_1088	NA	Psudo_sample_ID_1091	NA	NA	NA	NA	NA
Psudo_participant_ID_73	Psudo_sample_ID_1110	Psudo_sample_ID_1109	Psudo_sample_ID_1108	Psudo_sample_ID_1106	Psudo_sample_ID_1104	NA	Psudo_sample_ID_1107	Psudo_sample_ID_1105	NA	NA	NA	NA
Psudo_participant_ID_74	Psudo_sample_ID_1123	Psudo_sample_ID_1122	Psudo_sample_ID_1121	NA	NA	NA	Psudo_sample_ID_1119	NA	NA	NA	NA	NA
Psudo_participant_ID_77	Psudo_sample_ID_1165	Psudo_sample_ID_1167	Psudo_sample_ID_1166	NA	NA	NA	NA	NA	NA	NA	Psudo_sample_ID_1161	NA
Psudo_participant_ID_79	Psudo_sample_ID_1196	Psudo_sample_ID_1198	Psudo_sample_ID_1197	NA	NA	Psudo_sample_ID_1192	Psudo_sample_ID_1195	NA	NA	NA	NA	NA
Psudo_participant_ID_80	Psudo_sample_ID_1204	Psudo_sample_ID_1212	Psudo_sample_ID_1205	NA	Psudo_sample_ID_1202	NA	NA	Psudo_sample_ID_1203	NA	NA	Psudo_sample_ID_1199	NA
Psudo_participant_ID_81	Psudo_sample_ID_1218	Psudo_sample_ID_1223	Psudo_sample_ID_1219	Psudo_sample_ID_1216	NA	Psudo_sample_ID_1214	NA	NA	NA	NA	NA	NA
Psudo_participant_ID_83	Psudo_sample_ID_1240	Psudo_sample_ID_1245	Psudo_sample_ID_1241	Psudo_sample_ID_1238	NA	NA	NA	NA	NA	NA	NA	NA
Psudo_participant_ID_84	Psudo_sample_ID_1261	Psudo_sample_ID_1260	Psudo_sample_ID_1262	NA	NA	Psudo_sample_ID_1255	NA	NA	Psudo_sample_ID_1256	NA	NA	NA
Psudo_participant_ID_85	Psudo_sample_ID_1273	Psudo_sample_ID_1272	NA	Psudo_sample_ID_1268	NA	NA	NA	NA	NA	NA	NA	NA
Psudo_participant_ID_87	Psudo_sample_ID_1288	Psudo_sample_ID_1293	Psudo_sample_ID_1289	NA	NA	NA	NA	Psudo_sample_ID_1285	NA	NA	NA	NA
Psudo_participant_ID_88	Psudo_sample_ID_1307	Psudo_sample_ID_1309	Psudo_sample_ID_1311	NA	NA	NA	Psudo_sample_ID_1306	Psudo_sample_ID_1304	NA	NA	NA	NA
Psudo_participant_ID_9	Psudo_sample_ID_106	Psudo_sample_ID_108	Psudo_sample_ID_107	NA	NA	NA	Psudo_sample_ID_105	NA	NA	NA	NA	NA
Psudo_participant_ID_92	Psudo_sample_ID_1366	Psudo_sample_ID_1369	Psudo_sample_ID_1367	NA	NA	Psudo_sample_ID_1362	NA	NA	NA	NA	NA	NA
Psudo_participant_ID_93	Psudo_sample_ID_1375	Psudo_sample_ID_1377	Psudo_sample_ID_1376	NA	Psudo_sample_ID_1373	NA	NA	NA	Psudo_sample_ID_1372	NA	NA	NA
Psudo_participant_ID_94	Psudo_sample_ID_1391	Psudo_sample_ID_1393	Psudo_sample_ID_1392	Psudo_sample_ID_1387	NA	NA	Psudo_sample_ID_1388	NA	NA	NA	NA	NA
Psudo_participant_ID_95	Psudo_sample_ID_1405	Psudo_sample_ID_1407	Psudo_sample_ID_1406	NA	Psudo_sample_ID_1401	NA	Psudo_sample_ID_1404	Psudo_sample_ID_1402	NA	NA	NA	NA
Psudo_participant_ID_96	Psudo_sample_ID_1421	Psudo_sample_ID_1423	Psudo_sample_ID_1422	NA	Psudo_sample_ID_1417	NA	NA	Psudo_sample_ID_1418	NA	NA	NA	NA
Psudo_participant_ID_97	Psudo_sample_ID_1432	Psudo_sample_ID_1431	Psudo_sample_ID_1430	NA	NA	NA	NA	Psudo_sample_ID_1424	NA	NA	NA	NA
Psudo_participant_ID_98	Psudo_sample_ID_1451	Psudo_sample_ID_1453	Psudo_sample_ID_1452	NA	Psudo_sample_ID_1446	NA	Psudo_sample_ID_1450	NA	NA	NA	NA	NA

## Sheet: Sheet 3
NB		NR		NS
ParticipantID	Baby_SampleID	ParticipantID	Baby_SampleID	ParticipantID	Baby_SampleID
Psudo_participant_ID_102	Psudo_sample_ID_1508	Psudo_participant_ID_104	Psudo_sample_ID_1548	Psudo_participant_ID_100	Psudo_sample_ID_1475
Psudo_participant_ID_103	Psudo_sample_ID_1528	Psudo_participant_ID_107	Psudo_sample_ID_1592	Psudo_participant_ID_102	Psudo_sample_ID_1510
Psudo_participant_ID_106	Psudo_sample_ID_1570	Psudo_participant_ID_112	Psudo_sample_ID_1659	Psudo_participant_ID_103	Psudo_sample_ID_1531
Psudo_participant_ID_108	Psudo_sample_ID_1605	Psudo_participant_ID_113	Psudo_sample_ID_1666	Psudo_participant_ID_104	Psudo_sample_ID_1549
Psudo_participant_ID_109	Psudo_sample_ID_1623	Psudo_participant_ID_119	Psudo_sample_ID_1759	Psudo_participant_ID_106	Psudo_sample_ID_1572
Psudo_participant_ID_11	Psudo_sample_ID_131	Psudo_participant_ID_129	Psudo_sample_ID_1888	Psudo_participant_ID_108	Psudo_sample_ID_1604
Psudo_participant_ID_112	Psudo_sample_ID_1655	Psudo_participant_ID_131	Psudo_sample_ID_1918	Psudo_participant_ID_11	Psudo_sample_ID_129
Psudo_participant_ID_113	Psudo_sample_ID_1667	Psudo_participant_ID_132	Psudo_sample_ID_1935	Psudo_participant_ID_110	Psudo_sample_ID_1633
Psudo_participant_ID_115	Psudo_sample_ID_1694	Psudo_participant_ID_133	Psudo_sample_ID_1955	Psudo_participant_ID_116	Psudo_sample_ID_1717
Psudo_participant_ID_116	Psudo_sample_ID_1720	Psudo_participant_ID_135	Psudo_sample_ID_1990	Psudo_participant_ID_120	Psudo_sample_ID_1775
Psudo_participant_ID_117	Psudo_sample_ID_1734	Psudo_participant_ID_136	Psudo_sample_ID_2002	Psudo_participant_ID_131	Psudo_sample_ID_1916
Psudo_participant_ID_119	Psudo_sample_ID_1760	Psudo_participant_ID_138	Psudo_sample_ID_2046	Psudo_participant_ID_133	Psudo_sample_ID_1951
Psudo_participant_ID_12	Psudo_sample_ID_138	Psudo_participant_ID_142	Psudo_sample_ID_2105	Psudo_participant_ID_143	Psudo_sample_ID_2121
Psudo_participant_ID_120	Psudo_sample_ID_1778	Psudo_participant_ID_143	Psudo_sample_ID_2120	Psudo_participant_ID_149	Psudo_sample_ID_2215
Psudo_participant_ID_124	Psudo_sample_ID_1834	Psudo_participant_ID_146	Psudo_sample_ID_2175	Psudo_participant_ID_153	Psudo_sample_ID_2282
Psudo_participant_ID_125	Psudo_sample_ID_1850	Psudo_participant_ID_149	Psudo_sample_ID_2217	Psudo_participant_ID_155	Psudo_sample_ID_2317
Psudo_participant_ID_126	Psudo_sample_ID_1864	Psudo_participant_ID_152	Psudo_sample_ID_2269	Psudo_participant_ID_156	Psudo_sample_ID_2335
Psudo_participant_ID_129	Psudo_sample_ID_1889	Psudo_participant_ID_153	Psudo_sample_ID_2284	Psudo_participant_ID_168	Psudo_sample_ID_2543
Psudo_participant_ID_130	Psudo_sample_ID_1898	Psudo_participant_ID_155	Psudo_sample_ID_2316	Psudo_participant_ID_173	Psudo_sample_ID_2640
Psudo_participant_ID_131	Psudo_sample_ID_1914	Psudo_participant_ID_157	Psudo_sample_ID_2347	Psudo_participant_ID_18	Psudo_sample_ID_232
Psudo_participant_ID_132	Psudo_sample_ID_1934	Psudo_participant_ID_16	Psudo_sample_ID_205	Psudo_participant_ID_185	Psudo_sample_ID_2831
Psudo_participant_ID_136	Psudo_sample_ID_2001	Psudo_participant_ID_160	Psudo_sample_ID_2410	Psudo_participant_ID_188	Psudo_sample_ID_2877
Psudo_participant_ID_14	Psudo_sample_ID_173	Psudo_participant_ID_164	Psudo_sample_ID_2477	Psudo_participant_ID_189	Psudo_sample_ID_2897
Psudo_participant_ID_140	Psudo_sample_ID_2069	Psudo_participant_ID_167	Psudo_sample_ID_2531	Psudo_participant_ID_192	Psudo_sample_ID_2941
Psudo_participant_ID_141	Psudo_sample_ID_2086	Psudo_participant_ID_170	Psudo_sample_ID_2589	Psudo_participant_ID_193	Psudo_sample_ID_2953
Psudo_participant_ID_143	Psudo_sample_ID_2119	Psudo_participant_ID_172	Psudo_sample_ID_2622	Psudo_participant_ID_194	Psudo_sample_ID_2970
Psudo_participant_ID_144	Psudo_sample_ID_2136	Psudo_participant_ID_174	Psudo_sample_ID_2648	Psudo_participant_ID_199	Psudo_sample_ID_3052
Psudo_participant_ID_146	Psudo_sample_ID_2171	Psudo_participant_ID_175	Psudo_sample_ID_2671	Psudo_participant_ID_200	Psudo_sample_ID_3068
Psudo_participant_ID_149	Psudo_sample_ID_2216	Psudo_participant_ID_18	Psudo_sample_ID_234	Psudo_participant_ID_201	Psudo_sample_ID_3090
Psudo_participant_ID_153	Psudo_sample_ID_2283	Psudo_participant_ID_180	Psudo_sample_ID_2740	Psudo_participant_ID_202	Psudo_sample_ID_3102
Psudo_participant_ID_154	Psudo_sample_ID_2301	Psudo_participant_ID_181	Psudo_sample_ID_2755	Psudo_participant_ID_205	Psudo_sample_ID_3162
Psudo_participant_ID_155	Psudo_sample_ID_2315	Psudo_participant_ID_187	Psudo_sample_ID_2864	Psudo_participant_ID_208	Psudo_sample_ID_3231
Psudo_participant_ID_156	Psudo_sample_ID_2336	Psudo_participant_ID_189	Psudo_sample_ID_2901	Psudo_participant_ID_21	Psudo_sample_ID_277
Psudo_participant_ID_159	Psudo_sample_ID_2388	Psudo_participant_ID_192	Psudo_sample_ID_2943	Psudo_participant_ID_210	Psudo_sample_ID_3263
Psudo_participant_ID_160	Psudo_sample_ID_2409	Psudo_participant_ID_193	Psudo_sample_ID_2957	Psudo_participant_ID_211	Psudo_sample_ID_3289
Psudo_participant_ID_161	Psudo_sample_ID_2426	Psudo_participant_ID_194	Psudo_sample_ID_2972	Psudo_participant_ID_213	Psudo_sample_ID_3329
Psudo_participant_ID_163	Psudo_sample_ID_2464	Psudo_participant_ID_197	Psudo_sample_ID_3023	Psudo_participant_ID_215	Psudo_sample_ID_3368
Psudo_participant_ID_164	Psudo_sample_ID_2476	Psudo_participant_ID_20	Psudo_sample_ID_258	Psudo_participant_ID_22	Psudo_sample_ID_295
Psudo_participant_ID_166	Psudo_sample_ID_2514	Psudo_participant_ID_200	Psudo_sample_ID_3070	Psudo_participant_ID_23	Psudo_sample_ID_312
Psudo_participant_ID_168	Psudo_sample_ID_2544	Psudo_participant_ID_201	Psudo_sample_ID_3087	Psudo_participant_ID_24	Psudo_sample_ID_326
Psudo_participant_ID_169	Psudo_sample_ID_2565	Psudo_participant_ID_202	Psudo_sample_ID_3106	Psudo_participant_ID_26	Psudo_sample_ID_356
Psudo_participant_ID_170	Psudo_sample_ID_2588	Psudo_participant_ID_204	Psudo_sample_ID_3147	Psudo_participant_ID_31	Psudo_sample_ID_433
Psudo_participant_ID_171	Psudo_sample_ID_2606	Psudo_participant_ID_205	Psudo_sample_ID_3166	Psudo_participant_ID_34	Psudo_sample_ID_497
Psudo_participant_ID_172	Psudo_sample_ID_2617	Psudo_participant_ID_206	Psudo_sample_ID_3183	Psudo_participant_ID_37	Psudo_sample_ID_529
Psudo_participant_ID_174	Psudo_sample_ID_2649	Psudo_participant_ID_207	Psudo_sample_ID_3215	Psudo_participant_ID_43	Psudo_sample_ID_620
Psudo_participant_ID_175	Psudo_sample_ID_2670	Psudo_participant_ID_21	Psudo_sample_ID_276	Psudo_participant_ID_44	Psudo_sample_ID_634
Psudo_participant_ID_178	Psudo_sample_ID_2709	Psudo_participant_ID_211	Psudo_sample_ID_3288	Psudo_participant_ID_46	Psudo_sample_ID_671
Psudo_participant_ID_18	Psudo_sample_ID_233	Psudo_participant_ID_213	Psudo_sample_ID_3326	Psudo_participant_ID_5	Psudo_sample_ID_56
Psudo_participant_ID_182	Psudo_sample_ID_2775	Psudo_participant_ID_215	Psudo_sample_ID_3370	Psudo_participant_ID_52	Psudo_sample_ID_769
Psudo_participant_ID_183	Psudo_sample_ID_2792	Psudo_participant_ID_216	Psudo_sample_ID_3384	Psudo_participant_ID_53	Psudo_sample_ID_785
Psudo_participant_ID_184	Psudo_sample_ID_2811	Psudo_participant_ID_22	Psudo_sample_ID_294	Psudo_participant_ID_54	Psudo_sample_ID_797
Psudo_participant_ID_185	Psudo_sample_ID_2832	Psudo_participant_ID_26	Psudo_sample_ID_358	Psudo_participant_ID_56	Psudo_sample_ID_834
Psudo_participant_ID_186	Psudo_sample_ID_2847	Psudo_participant_ID_27	Psudo_sample_ID_375	Psudo_participant_ID_58	Psudo_sample_ID_873
Psudo_participant_ID_187	Psudo_sample_ID_2865	Psudo_participant_ID_28	Psudo_sample_ID_392	Psudo_participant_ID_60	Psudo_sample_ID_905
Psudo_participant_ID_188	Psudo_sample_ID_2875	Psudo_participant_ID_3	Psudo_sample_ID_31	Psudo_participant_ID_65	Psudo_sample_ID_1006
Psudo_participant_ID_189	Psudo_sample_ID_2898	Psudo_participant_ID_31	Psudo_sample_ID_434	Psudo_participant_ID_66	Psudo_sample_ID_1024
Psudo_participant_ID_191	Psudo_sample_ID_2922	Psudo_participant_ID_33	Psudo_sample_ID_473	Psudo_participant_ID_77	Psudo_sample_ID_1161
Psudo_participant_ID_192	Psudo_sample_ID_2938	Psudo_participant_ID_39	Psudo_sample_ID_557	Psudo_participant_ID_80	Psudo_sample_ID_1199
Psudo_participant_ID_193	Psudo_sample_ID_2954	Psudo_participant_ID_40	Psudo_sample_ID_576
Psudo_participant_ID_194	Psudo_sample_ID_2971	Psudo_participant_ID_42	Psudo_sample_ID_603
Psudo_participant_ID_195	Psudo_sample_ID_2988	Psudo_participant_ID_46	Psudo_sample_ID_675
Psudo_participant_ID_196	Psudo_sample_ID_3001	Psudo_participant_ID_51	Psudo_sample_ID_749
Psudo_participant_ID_199	Psudo_sample_ID_3050	Psudo_participant_ID_53	Psudo_sample_ID_784
Psudo_participant_ID_2	Psudo_sample_ID_11	Psudo_participant_ID_56	Psudo_sample_ID_836
Psudo_participant_ID_20	Psudo_sample_ID_257	Psudo_participant_ID_58	Psudo_sample_ID_875
Psudo_participant_ID_200	Psudo_sample_ID_3069	Psudo_participant_ID_6	Psudo_sample_ID_70
Psudo_participant_ID_202	Psudo_sample_ID_3105	Psudo_participant_ID_60	Psudo_sample_ID_907
Psudo_participant_ID_204	Psudo_sample_ID_3146	Psudo_participant_ID_64	Psudo_sample_ID_983
Psudo_participant_ID_205	Psudo_sample_ID_3165	Psudo_participant_ID_65	Psudo_sample_ID_1004
Psudo_participant_ID_206	Psudo_sample_ID_3184	Psudo_participant_ID_70	Psudo_sample_ID_1063
Psudo_participant_ID_209	Psudo_sample_ID_3247	Psudo_participant_ID_71	Psudo_sample_ID_1080
Psudo_participant_ID_213	Psudo_sample_ID_3327	Psudo_participant_ID_72	Psudo_sample_ID_1091
Psudo_participant_ID_214	Psudo_sample_ID_3346	Psudo_participant_ID_73	Psudo_sample_ID_1107
Psudo_participant_ID_215	Psudo_sample_ID_3369	Psudo_participant_ID_74	Psudo_sample_ID_1119
Psudo_participant_ID_216	Psudo_sample_ID_3383	Psudo_participant_ID_79	Psudo_sample_ID_1195
Psudo_participant_ID_217	Psudo_sample_ID_3400	Psudo_participant_ID_80	Psudo_sample_ID_1203
Psudo_participant_ID_218	Psudo_sample_ID_3416	Psudo_participant_ID_84	Psudo_sample_ID_1256
Psudo_participant_ID_22	Psudo_sample_ID_293	Psudo_participant_ID_87	Psudo_sample_ID_1285
Psudo_participant_ID_25	Psudo_sample_ID_343	Psudo_participant_ID_88	Psudo_sample_ID_1306
Psudo_participant_ID_27	Psudo_sample_ID_374	Psudo_participant_ID_9	Psudo_sample_ID_105
Psudo_participant_ID_28	Psudo_sample_ID_391	Psudo_participant_ID_93	Psudo_sample_ID_1372
Psudo_participant_ID_32	Psudo_sample_ID_452	Psudo_participant_ID_94	Psudo_sample_ID_1388
Psudo_participant_ID_34	Psudo_sample_ID_500	Psudo_participant_ID_95	Psudo_sample_ID_1404
Psudo_participant_ID_36	Psudo_sample_ID_517	Psudo_participant_ID_96	Psudo_sample_ID_1418
Psudo_participant_ID_37	Psudo_sample_ID_527	Psudo_participant_ID_97	Psudo_sample_ID_1424
Psudo_participant_ID_38	Psudo_sample_ID_549	Psudo_participant_ID_98	Psudo_sample_ID_1450
Psudo_participant_ID_39	Psudo_sample_ID_558
Psudo_participant_ID_4	Psudo_sample_ID_51
Psudo_participant_ID_40	Psudo_sample_ID_573
Psudo_participant_ID_42	Psudo_sample_ID_602
Psudo_participant_ID_44	Psudo_sample_ID_632
Psudo_participant_ID_45	Psudo_sample_ID_654
Psudo_participant_ID_47	Psudo_sample_ID_688
Psudo_participant_ID_48	Psudo_sample_ID_703
Psudo_participant_ID_49	Psudo_sample_ID_716
Psudo_participant_ID_50	Psudo_sample_ID_732
Psudo_participant_ID_51	Psudo_sample_ID_751
Psudo_participant_ID_53	Psudo_sample_ID_783
Psudo_participant_ID_55	Psudo_sample_ID_817
Psudo_participant_ID_58	Psudo_sample_ID_874
Psudo_participant_ID_6	Psudo_sample_ID_69
Psudo_participant_ID_63	Psudo_sample_ID_960
Psudo_participant_ID_65	Psudo_sample_ID_1007
Psudo_participant_ID_66	Psudo_sample_ID_1025
Psudo_participant_ID_72	Psudo_sample_ID_1088
Psudo_participant_ID_73	Psudo_sample_ID_1106
Psudo_participant_ID_79	Psudo_sample_ID_1192
Psudo_participant_ID_80	Psudo_sample_ID_1202
Psudo_participant_ID_81	Psudo_sample_ID_1216
Psudo_participant_ID_83	Psudo_sample_ID_1238
Psudo_participant_ID_84	Psudo_sample_ID_1255
Psudo_participant_ID_92	Psudo_sample_ID_1362
Psudo_participant_ID_93	Psudo_sample_ID_1373
Psudo_participant_ID_94	Psudo_sample_ID_1387
Psudo_participant_ID_95	Psudo_sample_ID_1401
Psudo_participant_ID_96	Psudo_sample_ID_1417
Psudo_participant_ID_98	Psudo_sample_ID_1446

## Sheet: Sheet 4
Lipid and NB pair list			Lipid and NR pair list			Lipid and NS pair list
Psudo_participant_ID_102	Psudo_sample_ID_1514	Psudo_sample_ID_1508	Psudo_participant_ID_104	Psudo_sample_ID_1553	Psudo_sample_ID_1548	Psudo_participant_ID_102	Psudo_sample_ID_1514	Psudo_sample_ID_1510
Psudo_participant_ID_108	Psudo_sample_ID_1610	Psudo_sample_ID_1605	Psudo_participant_ID_107	Psudo_sample_ID_1598	Psudo_sample_ID_1592	Psudo_participant_ID_104	Psudo_sample_ID_1553	Psudo_sample_ID_1549
Psudo_participant_ID_11	Psudo_sample_ID_133	Psudo_sample_ID_131	Psudo_participant_ID_112	Psudo_sample_ID_1660	Psudo_sample_ID_1659	Psudo_participant_ID_108	Psudo_sample_ID_1610	Psudo_sample_ID_1604
Psudo_participant_ID_112	Psudo_sample_ID_1660	Psudo_sample_ID_1655	Psudo_participant_ID_131	Psudo_sample_ID_1921	Psudo_sample_ID_1918	Psudo_participant_ID_11	Psudo_sample_ID_133	Psudo_sample_ID_129
Psudo_participant_ID_120	Psudo_sample_ID_1781	Psudo_sample_ID_1778	Psudo_participant_ID_132	Psudo_sample_ID_1940	Psudo_sample_ID_1935	Psudo_participant_ID_120	Psudo_sample_ID_1781	Psudo_sample_ID_1775
Psudo_participant_ID_126	Psudo_sample_ID_1870	Psudo_sample_ID_1864	Psudo_participant_ID_133	Psudo_sample_ID_1960	Psudo_sample_ID_1955	Psudo_participant_ID_131	Psudo_sample_ID_1921	Psudo_sample_ID_1916
Psudo_participant_ID_131	Psudo_sample_ID_1921	Psudo_sample_ID_1914	Psudo_participant_ID_136	Psudo_sample_ID_2006	Psudo_sample_ID_2002	Psudo_participant_ID_133	Psudo_sample_ID_1960	Psudo_sample_ID_1951
Psudo_participant_ID_132	Psudo_sample_ID_1940	Psudo_sample_ID_1934	Psudo_participant_ID_138	Psudo_sample_ID_2048	Psudo_sample_ID_2046	Psudo_participant_ID_143	Psudo_sample_ID_2125	Psudo_sample_ID_2121
Psudo_participant_ID_136	Psudo_sample_ID_2006	Psudo_sample_ID_2001	Psudo_participant_ID_142	Psudo_sample_ID_2107	Psudo_sample_ID_2105	Psudo_participant_ID_149	Psudo_sample_ID_2221	Psudo_sample_ID_2215
Psudo_participant_ID_141	Psudo_sample_ID_2089	Psudo_sample_ID_2086	Psudo_participant_ID_143	Psudo_sample_ID_2125	Psudo_sample_ID_2120	Psudo_participant_ID_153	Psudo_sample_ID_2288	Psudo_sample_ID_2282
Psudo_participant_ID_143	Psudo_sample_ID_2125	Psudo_sample_ID_2119	Psudo_participant_ID_146	Psudo_sample_ID_2177	Psudo_sample_ID_2175	Psudo_participant_ID_156	Psudo_sample_ID_2341	Psudo_sample_ID_2335
Psudo_participant_ID_144	Psudo_sample_ID_2141	Psudo_sample_ID_2136	Psudo_participant_ID_149	Psudo_sample_ID_2221	Psudo_sample_ID_2217	Psudo_participant_ID_168	Psudo_sample_ID_2550	Psudo_sample_ID_2543
Psudo_participant_ID_146	Psudo_sample_ID_2177	Psudo_sample_ID_2171	Psudo_participant_ID_152	Psudo_sample_ID_2271	Psudo_sample_ID_2269	Psudo_participant_ID_173	Psudo_sample_ID_2643	Psudo_sample_ID_2640
Psudo_participant_ID_149	Psudo_sample_ID_2221	Psudo_sample_ID_2216	Psudo_participant_ID_153	Psudo_sample_ID_2288	Psudo_sample_ID_2284	Psudo_participant_ID_185	Psudo_sample_ID_2838	Psudo_sample_ID_2831
Psudo_participant_ID_153	Psudo_sample_ID_2288	Psudo_sample_ID_2283	Psudo_participant_ID_157	Psudo_sample_ID_2352	Psudo_sample_ID_2347	Psudo_participant_ID_188	Psudo_sample_ID_2881	Psudo_sample_ID_2877
Psudo_participant_ID_154	Psudo_sample_ID_2304	Psudo_sample_ID_2301	Psudo_participant_ID_160	Psudo_sample_ID_2413	Psudo_sample_ID_2410	Psudo_participant_ID_189	Psudo_sample_ID_2902	Psudo_sample_ID_2897
Psudo_participant_ID_156	Psudo_sample_ID_2341	Psudo_sample_ID_2336	Psudo_participant_ID_164	Psudo_sample_ID_2481	Psudo_sample_ID_2477	Psudo_participant_ID_193	Psudo_sample_ID_2960	Psudo_sample_ID_2953
Psudo_participant_ID_159	Psudo_sample_ID_2394	Psudo_sample_ID_2388	Psudo_participant_ID_167	Psudo_sample_ID_2535	Psudo_sample_ID_2531	Psudo_participant_ID_194	Psudo_sample_ID_2976	Psudo_sample_ID_2970
Psudo_participant_ID_160	Psudo_sample_ID_2413	Psudo_sample_ID_2409	Psudo_participant_ID_170	Psudo_sample_ID_2593	Psudo_sample_ID_2589	Psudo_participant_ID_200	Psudo_sample_ID_3074	Psudo_sample_ID_3068
Psudo_participant_ID_161	Psudo_sample_ID_2429	Psudo_sample_ID_2426	Psudo_participant_ID_172	Psudo_sample_ID_2624	Psudo_sample_ID_2622	Psudo_participant_ID_201	Psudo_sample_ID_3092	Psudo_sample_ID_3090
Psudo_participant_ID_163	Psudo_sample_ID_2471	Psudo_sample_ID_2464	Psudo_participant_ID_174	Psudo_sample_ID_2652	Psudo_sample_ID_2648	Psudo_participant_ID_205	Psudo_sample_ID_3168	Psudo_sample_ID_3162
Psudo_participant_ID_164	Psudo_sample_ID_2481	Psudo_sample_ID_2476	Psudo_participant_ID_175	Psudo_sample_ID_2675	Psudo_sample_ID_2671	Psudo_participant_ID_208	Psudo_sample_ID_3235	Psudo_sample_ID_3231
Psudo_participant_ID_166	Psudo_sample_ID_2519	Psudo_sample_ID_2514	Psudo_participant_ID_180	Psudo_sample_ID_2743	Psudo_sample_ID_2740	Psudo_participant_ID_210	Psudo_sample_ID_3270	Psudo_sample_ID_3263
Psudo_participant_ID_168	Psudo_sample_ID_2550	Psudo_sample_ID_2544	Psudo_participant_ID_181	Psudo_sample_ID_2763	Psudo_sample_ID_2755	Psudo_participant_ID_211	Psudo_sample_ID_3293	Psudo_sample_ID_3289
Psudo_participant_ID_169	Psudo_sample_ID_2570	Psudo_sample_ID_2565	Psudo_participant_ID_187	Psudo_sample_ID_2868	Psudo_sample_ID_2864	Psudo_participant_ID_213	Psudo_sample_ID_3331	Psudo_sample_ID_3329
Psudo_participant_ID_170	Psudo_sample_ID_2593	Psudo_sample_ID_2588	Psudo_participant_ID_189	Psudo_sample_ID_2902	Psudo_sample_ID_2901	Psudo_participant_ID_215	Psudo_sample_ID_3372	Psudo_sample_ID_3368
Psudo_participant_ID_171	Psudo_sample_ID_2609	Psudo_sample_ID_2606	Psudo_participant_ID_193	Psudo_sample_ID_2960	Psudo_sample_ID_2957	Psudo_participant_ID_34	Psudo_sample_ID_502	Psudo_sample_ID_497
Psudo_participant_ID_172	Psudo_sample_ID_2624	Psudo_sample_ID_2617	Psudo_participant_ID_194	Psudo_sample_ID_2976	Psudo_sample_ID_2972	Psudo_participant_ID_53	Psudo_sample_ID_789	Psudo_sample_ID_785
Psudo_participant_ID_174	Psudo_sample_ID_2652	Psudo_sample_ID_2649	Psudo_participant_ID_197	Psudo_sample_ID_3027	Psudo_sample_ID_3023	Psudo_participant_ID_58	Psudo_sample_ID_880	Psudo_sample_ID_873
Psudo_participant_ID_175	Psudo_sample_ID_2675	Psudo_sample_ID_2670	Psudo_participant_ID_20	Psudo_sample_ID_263	Psudo_sample_ID_258	Psudo_participant_ID_65	Psudo_sample_ID_1010	Psudo_sample_ID_1006
Psudo_participant_ID_178	Psudo_sample_ID_2712	Psudo_sample_ID_2709	Psudo_participant_ID_200	Psudo_sample_ID_3074	Psudo_sample_ID_3070
Psudo_participant_ID_182	Psudo_sample_ID_2786	Psudo_sample_ID_2775	Psudo_participant_ID_201	Psudo_sample_ID_3092	Psudo_sample_ID_3087
Psudo_participant_ID_183	Psudo_sample_ID_2797	Psudo_sample_ID_2792	Psudo_participant_ID_205	Psudo_sample_ID_3168	Psudo_sample_ID_3166
Psudo_participant_ID_184	Psudo_sample_ID_2816	Psudo_sample_ID_2811	Psudo_participant_ID_206	Psudo_sample_ID_3187	Psudo_sample_ID_3183
Psudo_participant_ID_185	Psudo_sample_ID_2838	Psudo_sample_ID_2832	Psudo_participant_ID_207	Psudo_sample_ID_3218	Psudo_sample_ID_3215
Psudo_participant_ID_186	Psudo_sample_ID_2852	Psudo_sample_ID_2847	Psudo_participant_ID_211	Psudo_sample_ID_3293	Psudo_sample_ID_3288
Psudo_participant_ID_187	Psudo_sample_ID_2868	Psudo_sample_ID_2865	Psudo_participant_ID_213	Psudo_sample_ID_3331	Psudo_sample_ID_3326
Psudo_participant_ID_188	Psudo_sample_ID_2881	Psudo_sample_ID_2875	Psudo_participant_ID_215	Psudo_sample_ID_3372	Psudo_sample_ID_3370
Psudo_participant_ID_189	Psudo_sample_ID_2902	Psudo_sample_ID_2898	Psudo_participant_ID_216	Psudo_sample_ID_3389	Psudo_sample_ID_3384
Psudo_participant_ID_191	Psudo_sample_ID_2927	Psudo_sample_ID_2922	Psudo_participant_ID_28	Psudo_sample_ID_397	Psudo_sample_ID_392
Psudo_participant_ID_193	Psudo_sample_ID_2960	Psudo_sample_ID_2954	Psudo_participant_ID_33	Psudo_sample_ID_477	Psudo_sample_ID_473
Psudo_participant_ID_194	Psudo_sample_ID_2976	Psudo_sample_ID_2971	Psudo_participant_ID_39	Psudo_sample_ID_561	Psudo_sample_ID_557
Psudo_participant_ID_196	Psudo_sample_ID_3005	Psudo_sample_ID_3001	Psudo_participant_ID_42	Psudo_sample_ID_607	Psudo_sample_ID_603
Psudo_participant_ID_2	Psudo_sample_ID_20	Psudo_sample_ID_11	Psudo_participant_ID_51	Psudo_sample_ID_754	Psudo_sample_ID_749
Psudo_participant_ID_20	Psudo_sample_ID_263	Psudo_sample_ID_257	Psudo_participant_ID_53	Psudo_sample_ID_789	Psudo_sample_ID_784
Psudo_participant_ID_200	Psudo_sample_ID_3074	Psudo_sample_ID_3069	Psudo_participant_ID_58	Psudo_sample_ID_880	Psudo_sample_ID_875
Psudo_participant_ID_205	Psudo_sample_ID_3168	Psudo_sample_ID_3165	Psudo_participant_ID_6	Psudo_sample_ID_75	Psudo_sample_ID_70
Psudo_participant_ID_206	Psudo_sample_ID_3187	Psudo_sample_ID_3184	Psudo_participant_ID_65	Psudo_sample_ID_1010	Psudo_sample_ID_1004
Psudo_participant_ID_209	Psudo_sample_ID_3252	Psudo_sample_ID_3247	Psudo_participant_ID_73	Psudo_sample_ID_1108	Psudo_sample_ID_1107
Psudo_participant_ID_213	Psudo_sample_ID_3331	Psudo_sample_ID_3327	Psudo_participant_ID_79	Psudo_sample_ID_1197	Psudo_sample_ID_1195
Psudo_participant_ID_214	Psudo_sample_ID_3349	Psudo_sample_ID_3346	Psudo_participant_ID_84	Psudo_sample_ID_1262	Psudo_sample_ID_1256
Psudo_participant_ID_215	Psudo_sample_ID_3372	Psudo_sample_ID_3369	Psudo_participant_ID_9	Psudo_sample_ID_107	Psudo_sample_ID_105
Psudo_participant_ID_216	Psudo_sample_ID_3389	Psudo_sample_ID_3383	Psudo_participant_ID_93	Psudo_sample_ID_1376	Psudo_sample_ID_1372
Psudo_participant_ID_217	Psudo_sample_ID_3405	Psudo_sample_ID_3400	Psudo_participant_ID_96	Psudo_sample_ID_1422	Psudo_sample_ID_1418
Psudo_participant_ID_218	Psudo_sample_ID_3420	Psudo_sample_ID_3416
Psudo_participant_ID_28	Psudo_sample_ID_397	Psudo_sample_ID_391
Psudo_participant_ID_34	Psudo_sample_ID_502	Psudo_sample_ID_500
Psudo_participant_ID_42	Psudo_sample_ID_607	Psudo_sample_ID_602
Psudo_participant_ID_45	Psudo_sample_ID_659	Psudo_sample_ID_654
Psudo_participant_ID_48	Psudo_sample_ID_708	Psudo_sample_ID_703
Psudo_participant_ID_49	Psudo_sample_ID_724	Psudo_sample_ID_716
Psudo_participant_ID_51	Psudo_sample_ID_754	Psudo_sample_ID_751
Psudo_participant_ID_53	Psudo_sample_ID_789	Psudo_sample_ID_783
Psudo_participant_ID_55	Psudo_sample_ID_820	Psudo_sample_ID_817
Psudo_participant_ID_58	Psudo_sample_ID_880	Psudo_sample_ID_874
Psudo_participant_ID_6	Psudo_sample_ID_75	Psudo_sample_ID_69
Psudo_participant_ID_65	Psudo_sample_ID_1010	Psudo_sample_ID_1007
Psudo_participant_ID_73	Psudo_sample_ID_1108	Psudo_sample_ID_1106
Psudo_participant_ID_79	Psudo_sample_ID_1197	Psudo_sample_ID_1192
Psudo_participant_ID_84	Psudo_sample_ID_1262	Psudo_sample_ID_1255
Psudo_participant_ID_92	Psudo_sample_ID_1367	Psudo_sample_ID_1362
Psudo_participant_ID_93	Psudo_sample_ID_1376	Psudo_sample_ID_1373
Psudo_participant_ID_96	Psudo_sample_ID_1422	Psudo_sample_ID_1417

## Sheet: Sheet 5
Cytokine and NB pair list			Cytokine and NR pair list			Cytokine and NS pair list
Psudo_participant_ID_102	Psudo_sample_ID_1514	Psudo_sample_ID_1508	Psudo_participant_ID_104	Psudo_sample_ID_1553	Psudo_sample_ID_1548	Psudo_participant_ID_100	Psudo_sample_ID_1480	Psudo_sample_ID_1475
Psudo_participant_ID_103	Psudo_sample_ID_1535	Psudo_sample_ID_1528	Psudo_participant_ID_107	Psudo_sample_ID_1598	Psudo_sample_ID_1592	Psudo_participant_ID_102	Psudo_sample_ID_1514	Psudo_sample_ID_1510
Psudo_participant_ID_106	Psudo_sample_ID_1576	Psudo_sample_ID_1570	Psudo_participant_ID_112	Psudo_sample_ID_1660	Psudo_sample_ID_1659	Psudo_participant_ID_103	Psudo_sample_ID_1535	Psudo_sample_ID_1531
Psudo_participant_ID_108	Psudo_sample_ID_1610	Psudo_sample_ID_1605	Psudo_participant_ID_113	Psudo_sample_ID_1669	Psudo_sample_ID_1666	Psudo_participant_ID_104	Psudo_sample_ID_1553	Psudo_sample_ID_1549
Psudo_participant_ID_109	Psudo_sample_ID_1628	Psudo_sample_ID_1623	Psudo_participant_ID_119	Psudo_sample_ID_1764	Psudo_sample_ID_1759	Psudo_participant_ID_106	Psudo_sample_ID_1576	Psudo_sample_ID_1572
Psudo_participant_ID_11	Psudo_sample_ID_133	Psudo_sample_ID_131	Psudo_participant_ID_129	Psudo_sample_ID_1892	Psudo_sample_ID_1888	Psudo_participant_ID_108	Psudo_sample_ID_1610	Psudo_sample_ID_1604
Psudo_participant_ID_112	Psudo_sample_ID_1660	Psudo_sample_ID_1655	Psudo_participant_ID_131	Psudo_sample_ID_1921	Psudo_sample_ID_1918	Psudo_participant_ID_11	Psudo_sample_ID_133	Psudo_sample_ID_129
Psudo_participant_ID_113	Psudo_sample_ID_1669	Psudo_sample_ID_1667	Psudo_participant_ID_132	Psudo_sample_ID_1940	Psudo_sample_ID_1935	Psudo_participant_ID_110	Psudo_sample_ID_1639	Psudo_sample_ID_1633
Psudo_participant_ID_115	Psudo_sample_ID_1697	Psudo_sample_ID_1694	Psudo_participant_ID_133	Psudo_sample_ID_1960	Psudo_sample_ID_1955	Psudo_participant_ID_116	Psudo_sample_ID_1723	Psudo_sample_ID_1717
Psudo_participant_ID_116	Psudo_sample_ID_1723	Psudo_sample_ID_1720	Psudo_participant_ID_135	Psudo_sample_ID_1992	Psudo_sample_ID_1990	Psudo_participant_ID_120	Psudo_sample_ID_1781	Psudo_sample_ID_1775
Psudo_participant_ID_117	Psudo_sample_ID_1737	Psudo_sample_ID_1734	Psudo_participant_ID_136	Psudo_sample_ID_2006	Psudo_sample_ID_2002	Psudo_participant_ID_131	Psudo_sample_ID_1921	Psudo_sample_ID_1916
Psudo_participant_ID_119	Psudo_sample_ID_1764	Psudo_sample_ID_1760	Psudo_participant_ID_138	Psudo_sample_ID_2048	Psudo_sample_ID_2046	Psudo_participant_ID_133	Psudo_sample_ID_1960	Psudo_sample_ID_1951
Psudo_participant_ID_12	Psudo_sample_ID_140	Psudo_sample_ID_138	Psudo_participant_ID_142	Psudo_sample_ID_2107	Psudo_sample_ID_2105	Psudo_participant_ID_149	Psudo_sample_ID_2221	Psudo_sample_ID_2215
Psudo_participant_ID_120	Psudo_sample_ID_1781	Psudo_sample_ID_1778	Psudo_participant_ID_146	Psudo_sample_ID_2177	Psudo_sample_ID_2175	Psudo_participant_ID_153	Psudo_sample_ID_2288	Psudo_sample_ID_2282
Psudo_participant_ID_125	Psudo_sample_ID_1857	Psudo_sample_ID_1850	Psudo_participant_ID_149	Psudo_sample_ID_2221	Psudo_sample_ID_2217	Psudo_participant_ID_155	Psudo_sample_ID_2321	Psudo_sample_ID_2317
Psudo_participant_ID_129	Psudo_sample_ID_1892	Psudo_sample_ID_1889	Psudo_participant_ID_152	Psudo_sample_ID_2271	Psudo_sample_ID_2269	Psudo_participant_ID_156	Psudo_sample_ID_2341	Psudo_sample_ID_2335
Psudo_participant_ID_130	Psudo_sample_ID_1903	Psudo_sample_ID_1898	Psudo_participant_ID_153	Psudo_sample_ID_2288	Psudo_sample_ID_2284	Psudo_participant_ID_173	Psudo_sample_ID_2643	Psudo_sample_ID_2640
Psudo_participant_ID_131	Psudo_sample_ID_1921	Psudo_sample_ID_1914	Psudo_participant_ID_155	Psudo_sample_ID_2321	Psudo_sample_ID_2316	Psudo_participant_ID_18	Psudo_sample_ID_238	Psudo_sample_ID_232
Psudo_participant_ID_132	Psudo_sample_ID_1940	Psudo_sample_ID_1934	Psudo_participant_ID_157	Psudo_sample_ID_2352	Psudo_sample_ID_2347	Psudo_participant_ID_185	Psudo_sample_ID_2838	Psudo_sample_ID_2831
Psudo_participant_ID_136	Psudo_sample_ID_2006	Psudo_sample_ID_2001	Psudo_participant_ID_160	Psudo_sample_ID_2413	Psudo_sample_ID_2410	Psudo_participant_ID_188	Psudo_sample_ID_2881	Psudo_sample_ID_2877
Psudo_participant_ID_140	Psudo_sample_ID_2073	Psudo_sample_ID_2069	Psudo_participant_ID_164	Psudo_sample_ID_2481	Psudo_sample_ID_2477	Psudo_participant_ID_189	Psudo_sample_ID_2902	Psudo_sample_ID_2897
Psudo_participant_ID_141	Psudo_sample_ID_2089	Psudo_sample_ID_2086	Psudo_participant_ID_167	Psudo_sample_ID_2535	Psudo_sample_ID_2531	Psudo_participant_ID_192	Psudo_sample_ID_2945	Psudo_sample_ID_2941
Psudo_participant_ID_144	Psudo_sample_ID_2141	Psudo_sample_ID_2136	Psudo_participant_ID_170	Psudo_sample_ID_2593	Psudo_sample_ID_2589	Psudo_participant_ID_193	Psudo_sample_ID_2960	Psudo_sample_ID_2953
Psudo_participant_ID_146	Psudo_sample_ID_2177	Psudo_sample_ID_2171	Psudo_participant_ID_172	Psudo_sample_ID_2624	Psudo_sample_ID_2622	Psudo_participant_ID_194	Psudo_sample_ID_2976	Psudo_sample_ID_2970
Psudo_participant_ID_149	Psudo_sample_ID_2221	Psudo_sample_ID_2216	Psudo_participant_ID_174	Psudo_sample_ID_2652	Psudo_sample_ID_2648	Psudo_participant_ID_200	Psudo_sample_ID_3074	Psudo_sample_ID_3068
Psudo_participant_ID_153	Psudo_sample_ID_2288	Psudo_sample_ID_2283	Psudo_participant_ID_175	Psudo_sample_ID_2675	Psudo_sample_ID_2671	Psudo_participant_ID_201	Psudo_sample_ID_3092	Psudo_sample_ID_3090
Psudo_participant_ID_154	Psudo_sample_ID_2304	Psudo_sample_ID_2301	Psudo_participant_ID_18	Psudo_sample_ID_238	Psudo_sample_ID_234	Psudo_participant_ID_202	Psudo_sample_ID_3107	Psudo_sample_ID_3102
Psudo_participant_ID_155	Psudo_sample_ID_2321	Psudo_sample_ID_2315	Psudo_participant_ID_180	Psudo_sample_ID_2743	Psudo_sample_ID_2740	Psudo_participant_ID_205	Psudo_sample_ID_3168	Psudo_sample_ID_3162
Psudo_participant_ID_156	Psudo_sample_ID_2341	Psudo_sample_ID_2336	Psudo_participant_ID_181	Psudo_sample_ID_2763	Psudo_sample_ID_2755	Psudo_participant_ID_208	Psudo_sample_ID_3235	Psudo_sample_ID_3231
Psudo_participant_ID_159	Psudo_sample_ID_2394	Psudo_sample_ID_2388	Psudo_participant_ID_187	Psudo_sample_ID_2868	Psudo_sample_ID_2864	Psudo_participant_ID_21	Psudo_sample_ID_280	Psudo_sample_ID_277
Psudo_participant_ID_160	Psudo_sample_ID_2413	Psudo_sample_ID_2409	Psudo_participant_ID_189	Psudo_sample_ID_2902	Psudo_sample_ID_2901	Psudo_participant_ID_210	Psudo_sample_ID_3270	Psudo_sample_ID_3263
Psudo_participant_ID_161	Psudo_sample_ID_2429	Psudo_sample_ID_2426	Psudo_participant_ID_192	Psudo_sample_ID_2945	Psudo_sample_ID_2943	Psudo_participant_ID_211	Psudo_sample_ID_3293	Psudo_sample_ID_3289
Psudo_participant_ID_163	Psudo_sample_ID_2471	Psudo_sample_ID_2464	Psudo_participant_ID_193	Psudo_sample_ID_2960	Psudo_sample_ID_2957	Psudo_participant_ID_213	Psudo_sample_ID_3331	Psudo_sample_ID_3329
Psudo_participant_ID_164	Psudo_sample_ID_2481	Psudo_sample_ID_2476	Psudo_participant_ID_194	Psudo_sample_ID_2976	Psudo_sample_ID_2972	Psudo_participant_ID_215	Psudo_sample_ID_3372	Psudo_sample_ID_3368
Psudo_participant_ID_166	Psudo_sample_ID_2519	Psudo_sample_ID_2514	Psudo_participant_ID_197	Psudo_sample_ID_3027	Psudo_sample_ID_3023	Psudo_participant_ID_22	Psudo_sample_ID_302	Psudo_sample_ID_295
Psudo_participant_ID_169	Psudo_sample_ID_2570	Psudo_sample_ID_2565	Psudo_participant_ID_20	Psudo_sample_ID_263	Psudo_sample_ID_258	Psudo_participant_ID_23	Psudo_sample_ID_319	Psudo_sample_ID_312
Psudo_participant_ID_170	Psudo_sample_ID_2593	Psudo_sample_ID_2588	Psudo_participant_ID_200	Psudo_sample_ID_3074	Psudo_sample_ID_3070	Psudo_participant_ID_24	Psudo_sample_ID_336	Psudo_sample_ID_326
Psudo_participant_ID_171	Psudo_sample_ID_2609	Psudo_sample_ID_2606	Psudo_participant_ID_201	Psudo_sample_ID_3092	Psudo_sample_ID_3087	Psudo_participant_ID_26	Psudo_sample_ID_362	Psudo_sample_ID_356
Psudo_participant_ID_172	Psudo_sample_ID_2624	Psudo_sample_ID_2617	Psudo_participant_ID_202	Psudo_sample_ID_3107	Psudo_sample_ID_3106	Psudo_participant_ID_31	Psudo_sample_ID_437	Psudo_sample_ID_433
Psudo_participant_ID_174	Psudo_sample_ID_2652	Psudo_sample_ID_2649	Psudo_participant_ID_204	Psudo_sample_ID_3151	Psudo_sample_ID_3147	Psudo_participant_ID_34	Psudo_sample_ID_502	Psudo_sample_ID_497
Psudo_participant_ID_175	Psudo_sample_ID_2675	Psudo_sample_ID_2670	Psudo_participant_ID_205	Psudo_sample_ID_3168	Psudo_sample_ID_3166	Psudo_participant_ID_46	Psudo_sample_ID_677	Psudo_sample_ID_671
Psudo_participant_ID_178	Psudo_sample_ID_2712	Psudo_sample_ID_2709	Psudo_participant_ID_206	Psudo_sample_ID_3187	Psudo_sample_ID_3183	Psudo_participant_ID_5	Psudo_sample_ID_62	Psudo_sample_ID_56
Psudo_participant_ID_18	Psudo_sample_ID_238	Psudo_sample_ID_233	Psudo_participant_ID_207	Psudo_sample_ID_3218	Psudo_sample_ID_3215	Psudo_participant_ID_52	Psudo_sample_ID_775	Psudo_sample_ID_769
Psudo_participant_ID_182	Psudo_sample_ID_2786	Psudo_sample_ID_2775	Psudo_participant_ID_21	Psudo_sample_ID_280	Psudo_sample_ID_276	Psudo_participant_ID_53	Psudo_sample_ID_789	Psudo_sample_ID_785
Psudo_participant_ID_183	Psudo_sample_ID_2797	Psudo_sample_ID_2792	Psudo_participant_ID_211	Psudo_sample_ID_3293	Psudo_sample_ID_3288	Psudo_participant_ID_56	Psudo_sample_ID_839	Psudo_sample_ID_834
Psudo_participant_ID_184	Psudo_sample_ID_2816	Psudo_sample_ID_2811	Psudo_participant_ID_213	Psudo_sample_ID_3331	Psudo_sample_ID_3326	Psudo_participant_ID_58	Psudo_sample_ID_880	Psudo_sample_ID_873
Psudo_participant_ID_185	Psudo_sample_ID_2838	Psudo_sample_ID_2832	Psudo_participant_ID_215	Psudo_sample_ID_3372	Psudo_sample_ID_3370	Psudo_participant_ID_60	Psudo_sample_ID_909	Psudo_sample_ID_905
Psudo_participant_ID_186	Psudo_sample_ID_2852	Psudo_sample_ID_2847	Psudo_participant_ID_216	Psudo_sample_ID_3389	Psudo_sample_ID_3384	Psudo_participant_ID_65	Psudo_sample_ID_1010	Psudo_sample_ID_1006
Psudo_participant_ID_187	Psudo_sample_ID_2868	Psudo_sample_ID_2865	Psudo_participant_ID_22	Psudo_sample_ID_302	Psudo_sample_ID_294	Psudo_participant_ID_66	Psudo_sample_ID_1032	Psudo_sample_ID_1024
Psudo_participant_ID_188	Psudo_sample_ID_2881	Psudo_sample_ID_2875	Psudo_participant_ID_26	Psudo_sample_ID_362	Psudo_sample_ID_358	Psudo_participant_ID_77	Psudo_sample_ID_1166	Psudo_sample_ID_1161
Psudo_participant_ID_189	Psudo_sample_ID_2902	Psudo_sample_ID_2898	Psudo_participant_ID_27	Psudo_sample_ID_377	Psudo_sample_ID_375	Psudo_participant_ID_80	Psudo_sample_ID_1205	Psudo_sample_ID_1199
Psudo_participant_ID_191	Psudo_sample_ID_2927	Psudo_sample_ID_2922	Psudo_participant_ID_28	Psudo_sample_ID_397	Psudo_sample_ID_392
Psudo_participant_ID_192	Psudo_sample_ID_2945	Psudo_sample_ID_2938	Psudo_participant_ID_3	Psudo_sample_ID_35	Psudo_sample_ID_31
Psudo_participant_ID_193	Psudo_sample_ID_2960	Psudo_sample_ID_2954	Psudo_participant_ID_31	Psudo_sample_ID_437	Psudo_sample_ID_434
Psudo_participant_ID_194	Psudo_sample_ID_2976	Psudo_sample_ID_2971	Psudo_participant_ID_33	Psudo_sample_ID_477	Psudo_sample_ID_473
Psudo_participant_ID_195	Psudo_sample_ID_2994	Psudo_sample_ID_2988	Psudo_participant_ID_39	Psudo_sample_ID_561	Psudo_sample_ID_557
Psudo_participant_ID_196	Psudo_sample_ID_3005	Psudo_sample_ID_3001	Psudo_participant_ID_40	Psudo_sample_ID_579	Psudo_sample_ID_576
Psudo_participant_ID_20	Psudo_sample_ID_263	Psudo_sample_ID_257	Psudo_participant_ID_42	Psudo_sample_ID_607	Psudo_sample_ID_603
Psudo_participant_ID_200	Psudo_sample_ID_3074	Psudo_sample_ID_3069	Psudo_participant_ID_46	Psudo_sample_ID_677	Psudo_sample_ID_675
Psudo_participant_ID_202	Psudo_sample_ID_3107	Psudo_sample_ID_3105	Psudo_participant_ID_51	Psudo_sample_ID_754	Psudo_sample_ID_749
Psudo_participant_ID_204	Psudo_sample_ID_3151	Psudo_sample_ID_3146	Psudo_participant_ID_53	Psudo_sample_ID_789	Psudo_sample_ID_784
Psudo_participant_ID_205	Psudo_sample_ID_3168	Psudo_sample_ID_3165	Psudo_participant_ID_56	Psudo_sample_ID_839	Psudo_sample_ID_836
Psudo_participant_ID_206	Psudo_sample_ID_3187	Psudo_sample_ID_3184	Psudo_participant_ID_58	Psudo_sample_ID_880	Psudo_sample_ID_875
Psudo_participant_ID_213	Psudo_sample_ID_3331	Psudo_sample_ID_3327	Psudo_participant_ID_6	Psudo_sample_ID_75	Psudo_sample_ID_70
Psudo_participant_ID_214	Psudo_sample_ID_3349	Psudo_sample_ID_3346	Psudo_participant_ID_60	Psudo_sample_ID_909	Psudo_sample_ID_907
Psudo_participant_ID_215	Psudo_sample_ID_3372	Psudo_sample_ID_3369	Psudo_participant_ID_65	Psudo_sample_ID_1010	Psudo_sample_ID_1004
Psudo_participant_ID_216	Psudo_sample_ID_3389	Psudo_sample_ID_3383	Psudo_participant_ID_70	Psudo_sample_ID_1068	Psudo_sample_ID_1063
Psudo_participant_ID_217	Psudo_sample_ID_3405	Psudo_sample_ID_3400	Psudo_participant_ID_73	Psudo_sample_ID_1108	Psudo_sample_ID_1107
Psudo_participant_ID_218	Psudo_sample_ID_3420	Psudo_sample_ID_3416	Psudo_participant_ID_79	Psudo_sample_ID_1197	Psudo_sample_ID_1195
Psudo_participant_ID_22	Psudo_sample_ID_302	Psudo_sample_ID_293	Psudo_participant_ID_80	Psudo_sample_ID_1205	Psudo_sample_ID_1203
Psudo_participant_ID_25	Psudo_sample_ID_345	Psudo_sample_ID_343	Psudo_participant_ID_84	Psudo_sample_ID_1262	Psudo_sample_ID_1256
Psudo_participant_ID_27	Psudo_sample_ID_377	Psudo_sample_ID_374	Psudo_participant_ID_9	Psudo_sample_ID_107	Psudo_sample_ID_105
Psudo_participant_ID_28	Psudo_sample_ID_397	Psudo_sample_ID_391	Psudo_participant_ID_94	Psudo_sample_ID_1392	Psudo_sample_ID_1388
Psudo_participant_ID_32	Psudo_sample_ID_455	Psudo_sample_ID_452	Psudo_participant_ID_95	Psudo_sample_ID_1406	Psudo_sample_ID_1404
Psudo_participant_ID_34	Psudo_sample_ID_502	Psudo_sample_ID_500	Psudo_participant_ID_96	Psudo_sample_ID_1422	Psudo_sample_ID_1418
Psudo_participant_ID_36	Psudo_sample_ID_519	Psudo_sample_ID_517
Psudo_participant_ID_4	Psudo_sample_ID_54	Psudo_sample_ID_51
Psudo_participant_ID_40	Psudo_sample_ID_579	Psudo_sample_ID_573
Psudo_participant_ID_42	Psudo_sample_ID_607	Psudo_sample_ID_602
Psudo_participant_ID_45	Psudo_sample_ID_659	Psudo_sample_ID_654
Psudo_participant_ID_49	Psudo_sample_ID_724	Psudo_sample_ID_716
Psudo_participant_ID_51	Psudo_sample_ID_754	Psudo_sample_ID_751
Psudo_participant_ID_53	Psudo_sample_ID_789	Psudo_sample_ID_783
Psudo_participant_ID_55	Psudo_sample_ID_820	Psudo_sample_ID_817
Psudo_participant_ID_58	Psudo_sample_ID_880	Psudo_sample_ID_874
Psudo_participant_ID_6	Psudo_sample_ID_75	Psudo_sample_ID_69
Psudo_participant_ID_65	Psudo_sample_ID_1010	Psudo_sample_ID_1007
Psudo_participant_ID_66	Psudo_sample_ID_1032	Psudo_sample_ID_1025
Psudo_participant_ID_73	Psudo_sample_ID_1108	Psudo_sample_ID_1106
Psudo_participant_ID_79	Psudo_sample_ID_1197	Psudo_sample_ID_1192
Psudo_participant_ID_80	Psudo_sample_ID_1205	Psudo_sample_ID_1202
Psudo_participant_ID_81	Psudo_sample_ID_1219	Psudo_sample_ID_1216
Psudo_participant_ID_83	Psudo_sample_ID_1241	Psudo_sample_ID_1238
Psudo_participant_ID_84	Psudo_sample_ID_1262	Psudo_sample_ID_1255
Psudo_participant_ID_94	Psudo_sample_ID_1392	Psudo_sample_ID_1387
Psudo_participant_ID_95	Psudo_sample_ID_1406	Psudo_sample_ID_1401
Psudo_participant_ID_96	Psudo_sample_ID_1422	Psudo_sample_ID_1417

## Sheet: Sheet 6
Microbiome dyad	Number of sample sets
MV-NR	80
MV-NS	48
MV-NB	117
MR-NR	78
MR-NS	44
MR-NB	115
MB-NR	79
MB-NS	48
MB-NB	117
MV-NR pair list			MV-NS pair list			MV-NB pair list			MR-NR pair list			MR-NS pair list			MR-NB pair list			MR-NR pair list			MB-NS pair list			MB-NB pair list
MV	NR		MV	NS		MV	NB		MR	NR		MR	NS		MR	NB		MB	NR		MB	NS		MB	NB
Psudo_sample_ID_1563	Psudo_sample_ID_1548		Psudo_sample_ID_1488	Psudo_sample_ID_1477		Psudo_sample_ID_1526	Psudo_sample_ID_1508		Psudo_sample_ID_1564	Psudo_sample_ID_1548		Psudo_sample_ID_1489	Psudo_sample_ID_1477		Psudo_sample_ID_1527	Psudo_sample_ID_1508		Psudo_sample_ID_1562	Psudo_sample_ID_1548		Psudo_sample_ID_1487	Psudo_sample_ID_1477		Psudo_sample_ID_1525	Psudo_sample_ID_1508
Psudo_sample_ID_1601	Psudo_sample_ID_1592		Psudo_sample_ID_1526	Psudo_sample_ID_1510		Psudo_sample_ID_1545	Psudo_sample_ID_1528		Psudo_sample_ID_1602	Psudo_sample_ID_1592		Psudo_sample_ID_1527	Psudo_sample_ID_1510		Psudo_sample_ID_1546	Psudo_sample_ID_1528		Psudo_sample_ID_1600	Psudo_sample_ID_1592		Psudo_sample_ID_1525	Psudo_sample_ID_1510		Psudo_sample_ID_1544	Psudo_sample_ID_1528
Psudo_sample_ID_1663	Psudo_sample_ID_1659		Psudo_sample_ID_1545	Psudo_sample_ID_1531		Psudo_sample_ID_1588	Psudo_sample_ID_1570		Psudo_sample_ID_1678	Psudo_sample_ID_1666		Psudo_sample_ID_1546	Psudo_sample_ID_1531		Psudo_sample_ID_1589	Psudo_sample_ID_1570		Psudo_sample_ID_1668	Psudo_sample_ID_1666		Psudo_sample_ID_1544	Psudo_sample_ID_1531		Psudo_sample_ID_1587	Psudo_sample_ID_1570
Psudo_sample_ID_1677	Psudo_sample_ID_1666		Psudo_sample_ID_1563	Psudo_sample_ID_1549		Psudo_sample_ID_1619	Psudo_sample_ID_1605		Psudo_sample_ID_1774	Psudo_sample_ID_1759		Psudo_sample_ID_1564	Psudo_sample_ID_1549		Psudo_sample_ID_1620	Psudo_sample_ID_1605		Psudo_sample_ID_1766	Psudo_sample_ID_1759		Psudo_sample_ID_1562	Psudo_sample_ID_1549		Psudo_sample_ID_1618	Psudo_sample_ID_1605
Psudo_sample_ID_1770	Psudo_sample_ID_1759		Psudo_sample_ID_1588	Psudo_sample_ID_1572		Psudo_sample_ID_1631	Psudo_sample_ID_1623		Psudo_sample_ID_1896	Psudo_sample_ID_1888		Psudo_sample_ID_1589	Psudo_sample_ID_1572		Psudo_sample_ID_1632	Psudo_sample_ID_1623		Psudo_sample_ID_1894	Psudo_sample_ID_1888		Psudo_sample_ID_1587	Psudo_sample_ID_1572		Psudo_sample_ID_1627	Psudo_sample_ID_1623
Psudo_sample_ID_1895	Psudo_sample_ID_1888		Psudo_sample_ID_1619	Psudo_sample_ID_1603		Psudo_sample_ID_135	Psudo_sample_ID_131		Psudo_sample_ID_1933	Psudo_sample_ID_1918		Psudo_sample_ID_1620	Psudo_sample_ID_1603		Psudo_sample_ID_1678	Psudo_sample_ID_1667		Psudo_sample_ID_1931	Psudo_sample_ID_1918		Psudo_sample_ID_1618	Psudo_sample_ID_1603		Psudo_sample_ID_134	Psudo_sample_ID_131
Psudo_sample_ID_1932	Psudo_sample_ID_1918		Psudo_sample_ID_135	Psudo_sample_ID_129		Psudo_sample_ID_1663	Psudo_sample_ID_1655		Psudo_sample_ID_1950	Psudo_sample_ID_1935		Psudo_sample_ID_1646	Psudo_sample_ID_1633		Psudo_sample_ID_1716	Psudo_sample_ID_1694		Psudo_sample_ID_1945	Psudo_sample_ID_1935		Psudo_sample_ID_134	Psudo_sample_ID_129		Psudo_sample_ID_1668	Psudo_sample_ID_1667
Psudo_sample_ID_1949	Psudo_sample_ID_1935		Psudo_sample_ID_1645	Psudo_sample_ID_1633		Psudo_sample_ID_1677	Psudo_sample_ID_1667		Psudo_sample_ID_1967	Psudo_sample_ID_1955		Psudo_sample_ID_1730	Psudo_sample_ID_1717		Psudo_sample_ID_1730	Psudo_sample_ID_1720		Psudo_sample_ID_1956	Psudo_sample_ID_1955		Psudo_sample_ID_1644	Psudo_sample_ID_1633		Psudo_sample_ID_1714	Psudo_sample_ID_1694
Psudo_sample_ID_1966	Psudo_sample_ID_1955		Psudo_sample_ID_1729	Psudo_sample_ID_1717		Psudo_sample_ID_1715	Psudo_sample_ID_1694		Psudo_sample_ID_1999	Psudo_sample_ID_1990		Psudo_sample_ID_1794	Psudo_sample_ID_1775		Psudo_sample_ID_1744	Psudo_sample_ID_1734		Psudo_sample_ID_1997	Psudo_sample_ID_1990		Psudo_sample_ID_1728	Psudo_sample_ID_1717		Psudo_sample_ID_1728	Psudo_sample_ID_1720
Psudo_sample_ID_1998	Psudo_sample_ID_1990		Psudo_sample_ID_1793	Psudo_sample_ID_1775		Psudo_sample_ID_1729	Psudo_sample_ID_1720		Psudo_sample_ID_2025	Psudo_sample_ID_2002		Psudo_sample_ID_1933	Psudo_sample_ID_1916		Psudo_sample_ID_1774	Psudo_sample_ID_1760		Psudo_sample_ID_2023	Psudo_sample_ID_2002		Psudo_sample_ID_1792	Psudo_sample_ID_1775		Psudo_sample_ID_1736	Psudo_sample_ID_1734
Psudo_sample_ID_2024	Psudo_sample_ID_2002		Psudo_sample_ID_1932	Psudo_sample_ID_1916		Psudo_sample_ID_1743	Psudo_sample_ID_1734		Psudo_sample_ID_2055	Psudo_sample_ID_2046		Psudo_sample_ID_1967	Psudo_sample_ID_1951		Psudo_sample_ID_155	Psudo_sample_ID_138		Psudo_sample_ID_2053	Psudo_sample_ID_2046		Psudo_sample_ID_1931	Psudo_sample_ID_1916		Psudo_sample_ID_1766	Psudo_sample_ID_1760
Psudo_sample_ID_2054	Psudo_sample_ID_2046		Psudo_sample_ID_1966	Psudo_sample_ID_1951		Psudo_sample_ID_1770	Psudo_sample_ID_1760		Psudo_sample_ID_2118	Psudo_sample_ID_2105		Psudo_sample_ID_2231	Psudo_sample_ID_2215		Psudo_sample_ID_1794	Psudo_sample_ID_1778		Psudo_sample_ID_2116	Psudo_sample_ID_2105		Psudo_sample_ID_1956	Psudo_sample_ID_1951		Psudo_sample_ID_148	Psudo_sample_ID_138
Psudo_sample_ID_2117	Psudo_sample_ID_2105		Psudo_sample_ID_2134	Psudo_sample_ID_2121		Psudo_sample_ID_154	Psudo_sample_ID_138		Psudo_sample_ID_2190	Psudo_sample_ID_2175		Psudo_sample_ID_2298	Psudo_sample_ID_2282		Psudo_sample_ID_1849	Psudo_sample_ID_1834		Psudo_sample_ID_2133	Psudo_sample_ID_2120		Psudo_sample_ID_2133	Psudo_sample_ID_2121		Psudo_sample_ID_1792	Psudo_sample_ID_1778
Psudo_sample_ID_2134	Psudo_sample_ID_2120		Psudo_sample_ID_2227	Psudo_sample_ID_2215		Psudo_sample_ID_1793	Psudo_sample_ID_1778		Psudo_sample_ID_2231	Psudo_sample_ID_2217		Psudo_sample_ID_2334	Psudo_sample_ID_2317		Psudo_sample_ID_1863	Psudo_sample_ID_1850		Psudo_sample_ID_2185	Psudo_sample_ID_2175		Psudo_sample_ID_2226	Psudo_sample_ID_2215		Psudo_sample_ID_1844	Psudo_sample_ID_1834
Psudo_sample_ID_2189	Psudo_sample_ID_2175		Psudo_sample_ID_2297	Psudo_sample_ID_2282		Psudo_sample_ID_1848	Psudo_sample_ID_1834		Psudo_sample_ID_2281	Psudo_sample_ID_2269		Psudo_sample_ID_242	Psudo_sample_ID_232		Psudo_sample_ID_1874	Psudo_sample_ID_1864		Psudo_sample_ID_2226	Psudo_sample_ID_2217		Psudo_sample_ID_2296	Psudo_sample_ID_2282		Psudo_sample_ID_1859	Psudo_sample_ID_1850
Psudo_sample_ID_2227	Psudo_sample_ID_2217		Psudo_sample_ID_2333	Psudo_sample_ID_2317		Psudo_sample_ID_1862	Psudo_sample_ID_1850		Psudo_sample_ID_2298	Psudo_sample_ID_2284		Psudo_sample_ID_2845	Psudo_sample_ID_2831		Psudo_sample_ID_1896	Psudo_sample_ID_1889		Psudo_sample_ID_2279	Psudo_sample_ID_2269		Psudo_sample_ID_2332	Psudo_sample_ID_2317		Psudo_sample_ID_1872	Psudo_sample_ID_1864
Psudo_sample_ID_2280	Psudo_sample_ID_2269		Psudo_sample_ID_2645	Psudo_sample_ID_2640		Psudo_sample_ID_1873	Psudo_sample_ID_1864		Psudo_sample_ID_2334	Psudo_sample_ID_2316		Psudo_sample_ID_2893	Psudo_sample_ID_2874		Psudo_sample_ID_1910	Psudo_sample_ID_1898		Psudo_sample_ID_2296	Psudo_sample_ID_2284		Psudo_sample_ID_2642	Psudo_sample_ID_2640		Psudo_sample_ID_1894	Psudo_sample_ID_1889
Psudo_sample_ID_2297	Psudo_sample_ID_2284		Psudo_sample_ID_241	Psudo_sample_ID_232		Psudo_sample_ID_1895	Psudo_sample_ID_1889		Psudo_sample_ID_213	Psudo_sample_ID_205		Psudo_sample_ID_2910	Psudo_sample_ID_2897		Psudo_sample_ID_1933	Psudo_sample_ID_1914		Psudo_sample_ID_2332	Psudo_sample_ID_2316		Psudo_sample_ID_240	Psudo_sample_ID_232		Psudo_sample_ID_1911	Psudo_sample_ID_1898
Psudo_sample_ID_2333	Psudo_sample_ID_2316		Psudo_sample_ID_2844	Psudo_sample_ID_2831		Psudo_sample_ID_1912	Psudo_sample_ID_1898		Psudo_sample_ID_2420	Psudo_sample_ID_2410		Psudo_sample_ID_2952	Psudo_sample_ID_2941		Psudo_sample_ID_1950	Psudo_sample_ID_1934		Psudo_sample_ID_211	Psudo_sample_ID_205		Psudo_sample_ID_2843	Psudo_sample_ID_2831		Psudo_sample_ID_1931	Psudo_sample_ID_1914
Psudo_sample_ID_212	Psudo_sample_ID_205		Psudo_sample_ID_2895	Psudo_sample_ID_2874		Psudo_sample_ID_1932	Psudo_sample_ID_1914		Psudo_sample_ID_2494	Psudo_sample_ID_2477		Psudo_sample_ID_2986	Psudo_sample_ID_2970		Psudo_sample_ID_2025	Psudo_sample_ID_2001		Psudo_sample_ID_2421	Psudo_sample_ID_2410		Psudo_sample_ID_2894	Psudo_sample_ID_2874		Psudo_sample_ID_1945	Psudo_sample_ID_1934
Psudo_sample_ID_2422	Psudo_sample_ID_2410		Psudo_sample_ID_2909	Psudo_sample_ID_2897		Psudo_sample_ID_1949	Psudo_sample_ID_1934		Psudo_sample_ID_2539	Psudo_sample_ID_2531		Psudo_sample_ID_3067	Psudo_sample_ID_3052		Psudo_sample_ID_192	Psudo_sample_ID_173		Psudo_sample_ID_2492	Psudo_sample_ID_2477		Psudo_sample_ID_2908	Psudo_sample_ID_2897		Psudo_sample_ID_2023	Psudo_sample_ID_2001
Psudo_sample_ID_2493	Psudo_sample_ID_2477		Psudo_sample_ID_2951	Psudo_sample_ID_2941		Psudo_sample_ID_2024	Psudo_sample_ID_2001		Psudo_sample_ID_2603	Psudo_sample_ID_2589		Psudo_sample_ID_3084	Psudo_sample_ID_3068		Psudo_sample_ID_2077	Psudo_sample_ID_2069		Psudo_sample_ID_2540	Psudo_sample_ID_2531		Psudo_sample_ID_2950	Psudo_sample_ID_2941		Psudo_sample_ID_187	Psudo_sample_ID_173
Psudo_sample_ID_2541	Psudo_sample_ID_2531		Psudo_sample_ID_2985	Psudo_sample_ID_2970		Psudo_sample_ID_191	Psudo_sample_ID_173		Psudo_sample_ID_2638	Psudo_sample_ID_2622		Psudo_sample_ID_3101	Psudo_sample_ID_3090		Psudo_sample_ID_2103	Psudo_sample_ID_2086		Psudo_sample_ID_2601	Psudo_sample_ID_2589		Psudo_sample_ID_2984	Psudo_sample_ID_2970		Psudo_sample_ID_2075	Psudo_sample_ID_2069
Psudo_sample_ID_2602	Psudo_sample_ID_2589		Psudo_sample_ID_3066	Psudo_sample_ID_3052		Psudo_sample_ID_2076	Psudo_sample_ID_2069		Psudo_sample_ID_2668	Psudo_sample_ID_2648		Psudo_sample_ID_3181	Psudo_sample_ID_3162		Psudo_sample_ID_2151	Psudo_sample_ID_2136		Psudo_sample_ID_2636	Psudo_sample_ID_2622		Psudo_sample_ID_3065	Psudo_sample_ID_3052		Psudo_sample_ID_2101	Psudo_sample_ID_2086
Psudo_sample_ID_2637	Psudo_sample_ID_2622		Psudo_sample_ID_3083	Psudo_sample_ID_3068		Psudo_sample_ID_2102	Psudo_sample_ID_2086		Psudo_sample_ID_2685	Psudo_sample_ID_2671		Psudo_sample_ID_3245	Psudo_sample_ID_3231		Psudo_sample_ID_2190	Psudo_sample_ID_2171		Psudo_sample_ID_2666	Psudo_sample_ID_2648		Psudo_sample_ID_3082	Psudo_sample_ID_3068		Psudo_sample_ID_2133	Psudo_sample_ID_2119
Psudo_sample_ID_2661	Psudo_sample_ID_2648		Psudo_sample_ID_3100	Psudo_sample_ID_3090		Psudo_sample_ID_2134	Psudo_sample_ID_2119		Psudo_sample_ID_242	Psudo_sample_ID_234		Psudo_sample_ID_3286	Psudo_sample_ID_3263		Psudo_sample_ID_2231	Psudo_sample_ID_2216		Psudo_sample_ID_2683	Psudo_sample_ID_2671		Psudo_sample_ID_3099	Psudo_sample_ID_3090		Psudo_sample_ID_2146	Psudo_sample_ID_2136
Psudo_sample_ID_2684	Psudo_sample_ID_2671		Psudo_sample_ID_3180	Psudo_sample_ID_3162		Psudo_sample_ID_2150	Psudo_sample_ID_2136		Psudo_sample_ID_2752	Psudo_sample_ID_2740		Psudo_sample_ID_3300	Psudo_sample_ID_3289		Psudo_sample_ID_2298	Psudo_sample_ID_2283		Psudo_sample_ID_240	Psudo_sample_ID_234		Psudo_sample_ID_3179	Psudo_sample_ID_3162		Psudo_sample_ID_2185	Psudo_sample_ID_2171
Psudo_sample_ID_241	Psudo_sample_ID_234		Psudo_sample_ID_3244	Psudo_sample_ID_3231		Psudo_sample_ID_2189	Psudo_sample_ID_2171		Psudo_sample_ID_2773	Psudo_sample_ID_2755		Psudo_sample_ID_3341	Psudo_sample_ID_3329		Psudo_sample_ID_2314	Psudo_sample_ID_2301		Psudo_sample_ID_2750	Psudo_sample_ID_2740		Psudo_sample_ID_3237	Psudo_sample_ID_3231		Psudo_sample_ID_2226	Psudo_sample_ID_2216
Psudo_sample_ID_2751	Psudo_sample_ID_2740		Psudo_sample_ID_3285	Psudo_sample_ID_3263		Psudo_sample_ID_2227	Psudo_sample_ID_2216		Psudo_sample_ID_2873	Psudo_sample_ID_2864		Psudo_sample_ID_3382	Psudo_sample_ID_3368		Psudo_sample_ID_2334	Psudo_sample_ID_2315		Psudo_sample_ID_2768	Psudo_sample_ID_2755		Psudo_sample_ID_3284	Psudo_sample_ID_3263		Psudo_sample_ID_2296	Psudo_sample_ID_2283
Psudo_sample_ID_2772	Psudo_sample_ID_2755		Psudo_sample_ID_3302	Psudo_sample_ID_3289		Psudo_sample_ID_2297	Psudo_sample_ID_2283		Psudo_sample_ID_2910	Psudo_sample_ID_2899		Psudo_sample_ID_308	Psudo_sample_ID_295		Psudo_sample_ID_2345	Psudo_sample_ID_2336		Psudo_sample_ID_2871	Psudo_sample_ID_2864		Psudo_sample_ID_3295	Psudo_sample_ID_3289		Psudo_sample_ID_2312	Psudo_sample_ID_2301
Psudo_sample_ID_2872	Psudo_sample_ID_2864		Psudo_sample_ID_3340	Psudo_sample_ID_3329		Psudo_sample_ID_2313	Psudo_sample_ID_2301		Psudo_sample_ID_254	Psudo_sample_ID_247		Psudo_sample_ID_325	Psudo_sample_ID_312		Psudo_sample_ID_2408	Psudo_sample_ID_2388		Psudo_sample_ID_2908	Psudo_sample_ID_2899		Psudo_sample_ID_3333	Psudo_sample_ID_3329		Psudo_sample_ID_2332	Psudo_sample_ID_2315
Psudo_sample_ID_2909	Psudo_sample_ID_2899		Psudo_sample_ID_3381	Psudo_sample_ID_3368		Psudo_sample_ID_2333	Psudo_sample_ID_2315		Psudo_sample_ID_2952	Psudo_sample_ID_2943		Psudo_sample_ID_340	Psudo_sample_ID_326		Psudo_sample_ID_2420	Psudo_sample_ID_2409		Psudo_sample_ID_252	Psudo_sample_ID_247		Psudo_sample_ID_3380	Psudo_sample_ID_3368		Psudo_sample_ID_2340	Psudo_sample_ID_2336
Psudo_sample_ID_2951	Psudo_sample_ID_2943		Psudo_sample_ID_307	Psudo_sample_ID_295		Psudo_sample_ID_2344	Psudo_sample_ID_2336		Psudo_sample_ID_2969	Psudo_sample_ID_2957		Psudo_sample_ID_371	Psudo_sample_ID_356		Psudo_sample_ID_2442	Psudo_sample_ID_2426		Psudo_sample_ID_2950	Psudo_sample_ID_2943		Psudo_sample_ID_306	Psudo_sample_ID_295		Psudo_sample_ID_2403	Psudo_sample_ID_2388
Psudo_sample_ID_2968	Psudo_sample_ID_2957		Psudo_sample_ID_324	Psudo_sample_ID_312		Psudo_sample_ID_2398	Psudo_sample_ID_2388		Psudo_sample_ID_3037	Psudo_sample_ID_3023		Psudo_sample_ID_448	Psudo_sample_ID_433		Psudo_sample_ID_2475	Psudo_sample_ID_2464		Psudo_sample_ID_2967	Psudo_sample_ID_2957		Psudo_sample_ID_323	Psudo_sample_ID_312		Psudo_sample_ID_2421	Psudo_sample_ID_2409
Psudo_sample_ID_3039	Psudo_sample_ID_3023		Psudo_sample_ID_339	Psudo_sample_ID_326		Psudo_sample_ID_2422	Psudo_sample_ID_2409		Psudo_sample_ID_3084	Psudo_sample_ID_3070		Psudo_sample_ID_546	Psudo_sample_ID_529		Psudo_sample_ID_2494	Psudo_sample_ID_2476		Psudo_sample_ID_3038	Psudo_sample_ID_3023		Psudo_sample_ID_338	Psudo_sample_ID_326		Psudo_sample_ID_2437	Psudo_sample_ID_2426
Psudo_sample_ID_3083	Psudo_sample_ID_3070		Psudo_sample_ID_370	Psudo_sample_ID_356		Psudo_sample_ID_2441	Psudo_sample_ID_2426		Psudo_sample_ID_3101	Psudo_sample_ID_3087		Psudo_sample_ID_653	Psudo_sample_ID_634		Psudo_sample_ID_2529	Psudo_sample_ID_2514		Psudo_sample_ID_3082	Psudo_sample_ID_3070		Psudo_sample_ID_361	Psudo_sample_ID_356		Psudo_sample_ID_2473	Psudo_sample_ID_2464
Psudo_sample_ID_3100	Psudo_sample_ID_3087		Psudo_sample_ID_447	Psudo_sample_ID_433		Psudo_sample_ID_2474	Psudo_sample_ID_2464		Psudo_sample_ID_3126	Psudo_sample_ID_3106		Psudo_sample_ID_685	Psudo_sample_ID_671		Psudo_sample_ID_2563	Psudo_sample_ID_2544		Psudo_sample_ID_3099	Psudo_sample_ID_3087		Psudo_sample_ID_443	Psudo_sample_ID_433		Psudo_sample_ID_2492	Psudo_sample_ID_2476
Psudo_sample_ID_3125	Psudo_sample_ID_3106		Psudo_sample_ID_502	Psudo_sample_ID_499		Psudo_sample_ID_2493	Psudo_sample_ID_2476		Psudo_sample_ID_3161	Psudo_sample_ID_3147		Psudo_sample_ID_782	Psudo_sample_ID_769		Psudo_sample_ID_2586	Psudo_sample_ID_2565		Psudo_sample_ID_3124	Psudo_sample_ID_3106		Psudo_sample_ID_501	Psudo_sample_ID_499		Psudo_sample_ID_2527	Psudo_sample_ID_2514
Psudo_sample_ID_3160	Psudo_sample_ID_3147		Psudo_sample_ID_545	Psudo_sample_ID_529		Psudo_sample_ID_2528	Psudo_sample_ID_2514		Psudo_sample_ID_3181	Psudo_sample_ID_3166		Psudo_sample_ID_814	Psudo_sample_ID_797		Psudo_sample_ID_2603	Psudo_sample_ID_2588		Psudo_sample_ID_3159	Psudo_sample_ID_3147		Psudo_sample_ID_541	Psudo_sample_ID_529		Psudo_sample_ID_2561	Psudo_sample_ID_2544
Psudo_sample_ID_3180	Psudo_sample_ID_3166		Psudo_sample_ID_652	Psudo_sample_ID_634		Psudo_sample_ID_2562	Psudo_sample_ID_2544		Psudo_sample_ID_3207	Psudo_sample_ID_3183		Psudo_sample_ID_890	Psudo_sample_ID_873		Psudo_sample_ID_2616	Psudo_sample_ID_2606		Psudo_sample_ID_3179	Psudo_sample_ID_3166		Psudo_sample_ID_648	Psudo_sample_ID_634		Psudo_sample_ID_2582	Psudo_sample_ID_2565
Psudo_sample_ID_3209	Psudo_sample_ID_3183		Psudo_sample_ID_684	Psudo_sample_ID_671		Psudo_sample_ID_2585	Psudo_sample_ID_2565		Psudo_sample_ID_3228	Psudo_sample_ID_3215		Psudo_sample_ID_925	Psudo_sample_ID_905		Psudo_sample_ID_2638	Psudo_sample_ID_2617		Psudo_sample_ID_3205	Psudo_sample_ID_3183		Psudo_sample_ID_679	Psudo_sample_ID_671		Psudo_sample_ID_2601	Psudo_sample_ID_2588
Psudo_sample_ID_3227	Psudo_sample_ID_3215		Psudo_sample_ID_781	Psudo_sample_ID_769		Psudo_sample_ID_2602	Psudo_sample_ID_2588		Psudo_sample_ID_292	Psudo_sample_ID_276		Psudo_sample_ID_1039	Psudo_sample_ID_1024		Psudo_sample_ID_2668	Psudo_sample_ID_2649		Psudo_sample_ID_3226	Psudo_sample_ID_3215		Psudo_sample_ID_780	Psudo_sample_ID_769		Psudo_sample_ID_2614	Psudo_sample_ID_2606
Psudo_sample_ID_291	Psudo_sample_ID_276		Psudo_sample_ID_813	Psudo_sample_ID_797		Psudo_sample_ID_2615	Psudo_sample_ID_2606		Psudo_sample_ID_3300	Psudo_sample_ID_3288		Psudo_sample_ID_1179	Psudo_sample_ID_1161		Psudo_sample_ID_2685	Psudo_sample_ID_2670		Psudo_sample_ID_290	Psudo_sample_ID_276		Psudo_sample_ID_812	Psudo_sample_ID_797		Psudo_sample_ID_2636	Psudo_sample_ID_2617
Psudo_sample_ID_3302	Psudo_sample_ID_3288		Psudo_sample_ID_889	Psudo_sample_ID_873		Psudo_sample_ID_2637	Psudo_sample_ID_2617		Psudo_sample_ID_3341	Psudo_sample_ID_3326		Psudo_sample_ID_1212	Psudo_sample_ID_1199		Psudo_sample_ID_2718	Psudo_sample_ID_2709		Psudo_sample_ID_3295	Psudo_sample_ID_3288		Psudo_sample_ID_888	Psudo_sample_ID_873		Psudo_sample_ID_2666	Psudo_sample_ID_2649
Psudo_sample_ID_3340	Psudo_sample_ID_3326		Psudo_sample_ID_924	Psudo_sample_ID_905		Psudo_sample_ID_2661	Psudo_sample_ID_2649		Psudo_sample_ID_3382	Psudo_sample_ID_3370					Psudo_sample_ID_242	Psudo_sample_ID_233		Psudo_sample_ID_3333	Psudo_sample_ID_3326		Psudo_sample_ID_926	Psudo_sample_ID_905		Psudo_sample_ID_2683	Psudo_sample_ID_2670
Psudo_sample_ID_3381	Psudo_sample_ID_3370		Psudo_sample_ID_1038	Psudo_sample_ID_1024		Psudo_sample_ID_2684	Psudo_sample_ID_2670		Psudo_sample_ID_371	Psudo_sample_ID_358					Psudo_sample_ID_2790	Psudo_sample_ID_2775		Psudo_sample_ID_3380	Psudo_sample_ID_3370		Psudo_sample_ID_1037	Psudo_sample_ID_1024		Psudo_sample_ID_2719	Psudo_sample_ID_2709
Psudo_sample_ID_370	Psudo_sample_ID_358		Psudo_sample_ID_1178	Psudo_sample_ID_1161		Psudo_sample_ID_2717	Psudo_sample_ID_2709		Psudo_sample_ID_390	Psudo_sample_ID_375					Psudo_sample_ID_2807	Psudo_sample_ID_2792		Psudo_sample_ID_361	Psudo_sample_ID_358		Psudo_sample_ID_1177	Psudo_sample_ID_1161		Psudo_sample_ID_240	Psudo_sample_ID_233
Psudo_sample_ID_389	Psudo_sample_ID_375		Psudo_sample_ID_1211	Psudo_sample_ID_1199		Psudo_sample_ID_241	Psudo_sample_ID_233		Psudo_sample_ID_410	Psudo_sample_ID_392					Psudo_sample_ID_2829	Psudo_sample_ID_2811		Psudo_sample_ID_408	Psudo_sample_ID_392		Psudo_sample_ID_1210	Psudo_sample_ID_1199		Psudo_sample_ID_2788	Psudo_sample_ID_2775
Psudo_sample_ID_409	Psudo_sample_ID_392					Psudo_sample_ID_2789	Psudo_sample_ID_2775		Psudo_sample_ID_45	Psudo_sample_ID_31					Psudo_sample_ID_2845	Psudo_sample_ID_2832		Psudo_sample_ID_37	Psudo_sample_ID_31					Psudo_sample_ID_2808	Psudo_sample_ID_2792
Psudo_sample_ID_47	Psudo_sample_ID_31					Psudo_sample_ID_2809	Psudo_sample_ID_2792		Psudo_sample_ID_448	Psudo_sample_ID_434					Psudo_sample_ID_2862	Psudo_sample_ID_2847		Psudo_sample_ID_443	Psudo_sample_ID_434					Psudo_sample_ID_2827	Psudo_sample_ID_2811
Psudo_sample_ID_447	Psudo_sample_ID_434					Psudo_sample_ID_2828	Psudo_sample_ID_2811		Psudo_sample_ID_496	Psudo_sample_ID_473					Psudo_sample_ID_2873	Psudo_sample_ID_2865		Psudo_sample_ID_494	Psudo_sample_ID_473					Psudo_sample_ID_2843	Psudo_sample_ID_2832
Psudo_sample_ID_495	Psudo_sample_ID_473					Psudo_sample_ID_2844	Psudo_sample_ID_2832		Psudo_sample_ID_568	Psudo_sample_ID_557					Psudo_sample_ID_2893	Psudo_sample_ID_2875		Psudo_sample_ID_566	Psudo_sample_ID_557					Psudo_sample_ID_2860	Psudo_sample_ID_2847
Psudo_sample_ID_570	Psudo_sample_ID_557					Psudo_sample_ID_2861	Psudo_sample_ID_2847		Psudo_sample_ID_586	Psudo_sample_ID_576					Psudo_sample_ID_2910	Psudo_sample_ID_2898		Psudo_sample_ID_584	Psudo_sample_ID_576					Psudo_sample_ID_2871	Psudo_sample_ID_2865
Psudo_sample_ID_585	Psudo_sample_ID_576					Psudo_sample_ID_2872	Psudo_sample_ID_2865		Psudo_sample_ID_617	Psudo_sample_ID_603					Psudo_sample_ID_254	Psudo_sample_ID_246		Psudo_sample_ID_612	Psudo_sample_ID_603					Psudo_sample_ID_2894	Psudo_sample_ID_2875
Psudo_sample_ID_616	Psudo_sample_ID_603					Psudo_sample_ID_2895	Psudo_sample_ID_2875		Psudo_sample_ID_685	Psudo_sample_ID_675					Psudo_sample_ID_2937	Psudo_sample_ID_2922		Psudo_sample_ID_679	Psudo_sample_ID_675					Psudo_sample_ID_2908	Psudo_sample_ID_2898
Psudo_sample_ID_684	Psudo_sample_ID_675					Psudo_sample_ID_2909	Psudo_sample_ID_2898		Psudo_sample_ID_767	Psudo_sample_ID_749					Psudo_sample_ID_2952	Psudo_sample_ID_2938		Psudo_sample_ID_765	Psudo_sample_ID_749					Psudo_sample_ID_252	Psudo_sample_ID_246
Psudo_sample_ID_766	Psudo_sample_ID_749					Psudo_sample_ID_2936	Psudo_sample_ID_2922		Psudo_sample_ID_858	Psudo_sample_ID_836					Psudo_sample_ID_2969	Psudo_sample_ID_2954		Psudo_sample_ID_856	Psudo_sample_ID_836					Psudo_sample_ID_2932	Psudo_sample_ID_2922
Psudo_sample_ID_857	Psudo_sample_ID_836					Psudo_sample_ID_2951	Psudo_sample_ID_2938		Psudo_sample_ID_890	Psudo_sample_ID_875					Psudo_sample_ID_2986	Psudo_sample_ID_2971		Psudo_sample_ID_888	Psudo_sample_ID_875					Psudo_sample_ID_2950	Psudo_sample_ID_2938
Psudo_sample_ID_889	Psudo_sample_ID_875					Psudo_sample_ID_2968	Psudo_sample_ID_2954		Psudo_sample_ID_85	Psudo_sample_ID_70					Psudo_sample_ID_2998	Psudo_sample_ID_2988		Psudo_sample_ID_74	Psudo_sample_ID_70					Psudo_sample_ID_2967	Psudo_sample_ID_2954
Psudo_sample_ID_84	Psudo_sample_ID_70					Psudo_sample_ID_2985	Psudo_sample_ID_2971		Psudo_sample_ID_925	Psudo_sample_ID_907					Psudo_sample_ID_3021	Psudo_sample_ID_3001		Psudo_sample_ID_926	Psudo_sample_ID_907					Psudo_sample_ID_2984	Psudo_sample_ID_2971
Psudo_sample_ID_924	Psudo_sample_ID_907					Psudo_sample_ID_2997	Psudo_sample_ID_2988		Psudo_sample_ID_1002	Psudo_sample_ID_983					Psudo_sample_ID_3067	Psudo_sample_ID_3050		Psudo_sample_ID_1001	Psudo_sample_ID_983					Psudo_sample_ID_2996	Psudo_sample_ID_2988
Psudo_sample_ID_996	Psudo_sample_ID_983					Psudo_sample_ID_3020	Psudo_sample_ID_3001		Psudo_sample_ID_1023	Psudo_sample_ID_1004					Psudo_sample_ID_27	Psudo_sample_ID_11		Psudo_sample_ID_1021	Psudo_sample_ID_1004					Psudo_sample_ID_3019	Psudo_sample_ID_3001
Psudo_sample_ID_1022	Psudo_sample_ID_1004					Psudo_sample_ID_3066	Psudo_sample_ID_3050		Psudo_sample_ID_1078	Psudo_sample_ID_1063					Psudo_sample_ID_273	Psudo_sample_ID_257		Psudo_sample_ID_1076	Psudo_sample_ID_1063					Psudo_sample_ID_3065	Psudo_sample_ID_3050
Psudo_sample_ID_1077	Psudo_sample_ID_1063					Psudo_sample_ID_29	Psudo_sample_ID_11		Psudo_sample_ID_1103	Psudo_sample_ID_1091					Psudo_sample_ID_3084	Psudo_sample_ID_3069		Psudo_sample_ID_1083	Psudo_sample_ID_1080					Psudo_sample_ID_22	Psudo_sample_ID_11
Psudo_sample_ID_1086	Psudo_sample_ID_1080					Psudo_sample_ID_272	Psudo_sample_ID_257		Psudo_sample_ID_1114	Psudo_sample_ID_1107					Psudo_sample_ID_3126	Psudo_sample_ID_3105		Psudo_sample_ID_1101	Psudo_sample_ID_1091					Psudo_sample_ID_271	Psudo_sample_ID_257
Psudo_sample_ID_1102	Psudo_sample_ID_1091					Psudo_sample_ID_3083	Psudo_sample_ID_3069		Psudo_sample_ID_1133	Psudo_sample_ID_1119					Psudo_sample_ID_3161	Psudo_sample_ID_3146		Psudo_sample_ID_1112	Psudo_sample_ID_1107					Psudo_sample_ID_3082	Psudo_sample_ID_3069
Psudo_sample_ID_1113	Psudo_sample_ID_1107					Psudo_sample_ID_3125	Psudo_sample_ID_3105		Psudo_sample_ID_1198	Psudo_sample_ID_1195					Psudo_sample_ID_3181	Psudo_sample_ID_3165		Psudo_sample_ID_1131	Psudo_sample_ID_1119					Psudo_sample_ID_3124	Psudo_sample_ID_3105
Psudo_sample_ID_1132	Psudo_sample_ID_1119					Psudo_sample_ID_3160	Psudo_sample_ID_3146		Psudo_sample_ID_1212	Psudo_sample_ID_1203					Psudo_sample_ID_3207	Psudo_sample_ID_3184		Psudo_sample_ID_1196	Psudo_sample_ID_1195					Psudo_sample_ID_3159	Psudo_sample_ID_3146
Psudo_sample_ID_1197	Psudo_sample_ID_1195					Psudo_sample_ID_3180	Psudo_sample_ID_3165		Psudo_sample_ID_1266	Psudo_sample_ID_1256					Psudo_sample_ID_3262	Psudo_sample_ID_3247		Psudo_sample_ID_1210	Psudo_sample_ID_1203					Psudo_sample_ID_3179	Psudo_sample_ID_3165
Psudo_sample_ID_1211	Psudo_sample_ID_1203					Psudo_sample_ID_3209	Psudo_sample_ID_3184		Psudo_sample_ID_1299	Psudo_sample_ID_1285					Psudo_sample_ID_3341	Psudo_sample_ID_3325		Psudo_sample_ID_1264	Psudo_sample_ID_1256					Psudo_sample_ID_3205	Psudo_sample_ID_3184
Psudo_sample_ID_1265	Psudo_sample_ID_1256					Psudo_sample_ID_3261	Psudo_sample_ID_3247		Psudo_sample_ID_1315	Psudo_sample_ID_1306					Psudo_sample_ID_3365	Psudo_sample_ID_3346		Psudo_sample_ID_1300	Psudo_sample_ID_1285					Psudo_sample_ID_3251	Psudo_sample_ID_3247
Psudo_sample_ID_1301	Psudo_sample_ID_1285					Psudo_sample_ID_3340	Psudo_sample_ID_3325		Psudo_sample_ID_111	Psudo_sample_ID_105					Psudo_sample_ID_3382	Psudo_sample_ID_3369		Psudo_sample_ID_1313	Psudo_sample_ID_1306					Psudo_sample_ID_3333	Psudo_sample_ID_3325
Psudo_sample_ID_1314	Psudo_sample_ID_1306					Psudo_sample_ID_3364	Psudo_sample_ID_3346		Psudo_sample_ID_1383	Psudo_sample_ID_1372					Psudo_sample_ID_3399	Psudo_sample_ID_3383		Psudo_sample_ID_109	Psudo_sample_ID_105					Psudo_sample_ID_3363	Psudo_sample_ID_3346
Psudo_sample_ID_110	Psudo_sample_ID_105					Psudo_sample_ID_3381	Psudo_sample_ID_3369		Psudo_sample_ID_1399	Psudo_sample_ID_1388					Psudo_sample_ID_3412	Psudo_sample_ID_3400		Psudo_sample_ID_1384	Psudo_sample_ID_1372					Psudo_sample_ID_3380	Psudo_sample_ID_3369
Psudo_sample_ID_1385	Psudo_sample_ID_1372					Psudo_sample_ID_3398	Psudo_sample_ID_3383		Psudo_sample_ID_1416	Psudo_sample_ID_1404					Psudo_sample_ID_3427	Psudo_sample_ID_3416		Psudo_sample_ID_1397	Psudo_sample_ID_1388					Psudo_sample_ID_3397	Psudo_sample_ID_3383
Psudo_sample_ID_1398	Psudo_sample_ID_1388					Psudo_sample_ID_3414	Psudo_sample_ID_3400		Psudo_sample_ID_1423	Psudo_sample_ID_1418					Psudo_sample_ID_308	Psudo_sample_ID_293		Psudo_sample_ID_1414	Psudo_sample_ID_1404					Psudo_sample_ID_3413	Psudo_sample_ID_3400
Psudo_sample_ID_1412	Psudo_sample_ID_1404					Psudo_sample_ID_3431	Psudo_sample_ID_3416		Psudo_sample_ID_1442	Psudo_sample_ID_1424					Psudo_sample_ID_355	Psudo_sample_ID_343		Psudo_sample_ID_1421	Psudo_sample_ID_1418					Psudo_sample_ID_3430	Psudo_sample_ID_3416
Psudo_sample_ID_1422	Psudo_sample_ID_1418					Psudo_sample_ID_307	Psudo_sample_ID_293		Psudo_sample_ID_1465	Psudo_sample_ID_1450					Psudo_sample_ID_390	Psudo_sample_ID_374		Psudo_sample_ID_1432	Psudo_sample_ID_1424					Psudo_sample_ID_306	Psudo_sample_ID_293
Psudo_sample_ID_1444	Psudo_sample_ID_1424					Psudo_sample_ID_354	Psudo_sample_ID_343								Psudo_sample_ID_410	Psudo_sample_ID_391		Psudo_sample_ID_1463	Psudo_sample_ID_1450					Psudo_sample_ID_353	Psudo_sample_ID_343
Psudo_sample_ID_1464	Psudo_sample_ID_1450					Psudo_sample_ID_389	Psudo_sample_ID_374								Psudo_sample_ID_471	Psudo_sample_ID_452								Psudo_sample_ID_408	Psudo_sample_ID_391
						Psudo_sample_ID_409	Psudo_sample_ID_391								Psudo_sample_ID_523	Psudo_sample_ID_517								Psudo_sample_ID_415	Psudo_sample_ID_411
						Psudo_sample_ID_470	Psudo_sample_ID_452								Psudo_sample_ID_546	Psudo_sample_ID_527								Psudo_sample_ID_469	Psudo_sample_ID_452
						Psudo_sample_ID_502	Psudo_sample_ID_500								Psudo_sample_ID_553	Psudo_sample_ID_549								Psudo_sample_ID_501	Psudo_sample_ID_500
						Psudo_sample_ID_525	Psudo_sample_ID_517								Psudo_sample_ID_568	Psudo_sample_ID_556								Psudo_sample_ID_518	Psudo_sample_ID_517
						Psudo_sample_ID_545	Psudo_sample_ID_527								Psudo_sample_ID_55	Psudo_sample_ID_51								Psudo_sample_ID_541	Psudo_sample_ID_527
						Psudo_sample_ID_555	Psudo_sample_ID_549								Psudo_sample_ID_586	Psudo_sample_ID_573								Psudo_sample_ID_566	Psudo_sample_ID_556
						Psudo_sample_ID_570	Psudo_sample_ID_556								Psudo_sample_ID_617	Psudo_sample_ID_602								Psudo_sample_ID_53	Psudo_sample_ID_51
						Psudo_sample_ID_54	Psudo_sample_ID_51								Psudo_sample_ID_653	Psudo_sample_ID_632								Psudo_sample_ID_584	Psudo_sample_ID_573
						Psudo_sample_ID_585	Psudo_sample_ID_573								Psudo_sample_ID_666	Psudo_sample_ID_654								Psudo_sample_ID_612	Psudo_sample_ID_602
						Psudo_sample_ID_616	Psudo_sample_ID_602								Psudo_sample_ID_702	Psudo_sample_ID_688								Psudo_sample_ID_648	Psudo_sample_ID_632
						Psudo_sample_ID_652	Psudo_sample_ID_632								Psudo_sample_ID_715	Psudo_sample_ID_703								Psudo_sample_ID_664	Psudo_sample_ID_654
						Psudo_sample_ID_668	Psudo_sample_ID_654								Psudo_sample_ID_731	Psudo_sample_ID_716								Psudo_sample_ID_700	Psudo_sample_ID_688
						Psudo_sample_ID_701	Psudo_sample_ID_688								Psudo_sample_ID_741	Psudo_sample_ID_732								Psudo_sample_ID_713	Psudo_sample_ID_703
						Psudo_sample_ID_714	Psudo_sample_ID_703								Psudo_sample_ID_767	Psudo_sample_ID_751								Psudo_sample_ID_729	Psudo_sample_ID_716
						Psudo_sample_ID_730	Psudo_sample_ID_716								Psudo_sample_ID_796	Psudo_sample_ID_783								Psudo_sample_ID_745	Psudo_sample_ID_732
						Psudo_sample_ID_743	Psudo_sample_ID_732								Psudo_sample_ID_833	Psudo_sample_ID_818								Psudo_sample_ID_765	Psudo_sample_ID_751
						Psudo_sample_ID_766	Psudo_sample_ID_751								Psudo_sample_ID_890	Psudo_sample_ID_874								Psudo_sample_ID_794	Psudo_sample_ID_783
						Psudo_sample_ID_795	Psudo_sample_ID_783								Psudo_sample_ID_85	Psudo_sample_ID_69								Psudo_sample_ID_831	Psudo_sample_ID_818
						Psudo_sample_ID_832	Psudo_sample_ID_818								Psudo_sample_ID_979	Psudo_sample_ID_960								Psudo_sample_ID_888	Psudo_sample_ID_874
						Psudo_sample_ID_889	Psudo_sample_ID_874								Psudo_sample_ID_1023	Psudo_sample_ID_1007								Psudo_sample_ID_74	Psudo_sample_ID_69
						Psudo_sample_ID_84	Psudo_sample_ID_69								Psudo_sample_ID_1039	Psudo_sample_ID_1025								Psudo_sample_ID_977	Psudo_sample_ID_960
						Psudo_sample_ID_978	Psudo_sample_ID_960								Psudo_sample_ID_1103	Psudo_sample_ID_1088								Psudo_sample_ID_1021	Psudo_sample_ID_1007
						Psudo_sample_ID_1022	Psudo_sample_ID_1007								Psudo_sample_ID_1114	Psudo_sample_ID_1106								Psudo_sample_ID_1037	Psudo_sample_ID_1025
						Psudo_sample_ID_1038	Psudo_sample_ID_1025								Psudo_sample_ID_1198	Psudo_sample_ID_1192								Psudo_sample_ID_1101	Psudo_sample_ID_1088
						Psudo_sample_ID_1102	Psudo_sample_ID_1088								Psudo_sample_ID_1212	Psudo_sample_ID_1202								Psudo_sample_ID_1112	Psudo_sample_ID_1106
						Psudo_sample_ID_1113	Psudo_sample_ID_1106								Psudo_sample_ID_1223	Psudo_sample_ID_1216								Psudo_sample_ID_1196	Psudo_sample_ID_1192
						Psudo_sample_ID_1197	Psudo_sample_ID_1192								Psudo_sample_ID_1254	Psudo_sample_ID_1238								Psudo_sample_ID_1210	Psudo_sample_ID_1202
						Psudo_sample_ID_1211	Psudo_sample_ID_1202								Psudo_sample_ID_1266	Psudo_sample_ID_1255								Psudo_sample_ID_1221	Psudo_sample_ID_1216
						Psudo_sample_ID_1222	Psudo_sample_ID_1216								Psudo_sample_ID_1272	Psudo_sample_ID_1268								Psudo_sample_ID_1249	Psudo_sample_ID_1238
						Psudo_sample_ID_1253	Psudo_sample_ID_1238								Psudo_sample_ID_1369	Psudo_sample_ID_1362								Psudo_sample_ID_1264	Psudo_sample_ID_1255
						Psudo_sample_ID_1265	Psudo_sample_ID_1255								Psudo_sample_ID_1383	Psudo_sample_ID_1373								Psudo_sample_ID_1273	Psudo_sample_ID_1268
						Psudo_sample_ID_1368	Psudo_sample_ID_1362								Psudo_sample_ID_1399	Psudo_sample_ID_1387								Psudo_sample_ID_1366	Psudo_sample_ID_1362
						Psudo_sample_ID_1385	Psudo_sample_ID_1373								Psudo_sample_ID_1416	Psudo_sample_ID_1401								Psudo_sample_ID_1384	Psudo_sample_ID_1373
						Psudo_sample_ID_1398	Psudo_sample_ID_1387								Psudo_sample_ID_1423	Psudo_sample_ID_1417								Psudo_sample_ID_1397	Psudo_sample_ID_1387
						Psudo_sample_ID_1412	Psudo_sample_ID_1401								Psudo_sample_ID_1465	Psudo_sample_ID_1446								Psudo_sample_ID_1414	Psudo_sample_ID_1401
						Psudo_sample_ID_1422	Psudo_sample_ID_1417																	Psudo_sample_ID_1421	Psudo_sample_ID_1417
						Psudo_sample_ID_1464	Psudo_sample_ID_1446																	Psudo_sample_ID_1463	Psudo_sample_ID_1446

## Sheet: Sheet 7
Metadata	NB	NR	NS
Psudo_participant_ID_18	Psudo_sample_ID_233	Psudo_sample_ID_234	Psudo_sample_ID_232
Psudo_participant_ID_193	Psudo_sample_ID_2954	Psudo_sample_ID_2957	Psudo_sample_ID_2953
Psudo_participant_ID_205	Psudo_sample_ID_3165	Psudo_sample_ID_3166	Psudo_sample_ID_3162
Psudo_participant_ID_215	Psudo_sample_ID_3369	Psudo_sample_ID_3370	Psudo_sample_ID_3368
Psudo_participant_ID_58	Psudo_sample_ID_874	Psudo_sample_ID_875	Psudo_sample_ID_873
Psudo_participant_ID_65	Psudo_sample_ID_1007	Psudo_sample_ID_1004	Psudo_sample_ID_1006
Psudo_participant_ID_80	Psudo_sample_ID_1202	Psudo_sample_ID_1203	Psudo_sample_ID_1199
Psudo_participant_ID_131	Psudo_sample_ID_1914	Psudo_sample_ID_1918	Psudo_sample_ID_1916
Psudo_participant_ID_143	Psudo_sample_ID_2119	Psudo_sample_ID_2120	Psudo_sample_ID_2121
Psudo_participant_ID_149	Psudo_sample_ID_2216	Psudo_sample_ID_2217	Psudo_sample_ID_2215
Psudo_participant_ID_153	Psudo_sample_ID_2283	Psudo_sample_ID_2284	Psudo_sample_ID_2282
Psudo_participant_ID_155	Psudo_sample_ID_2315	Psudo_sample_ID_2316	Psudo_sample_ID_2317
Psudo_participant_ID_189	Psudo_sample_ID_2898	Psudo_sample_ID_2901	Psudo_sample_ID_2897
Psudo_participant_ID_192	Psudo_sample_ID_2938	Psudo_sample_ID_2943	Psudo_sample_ID_2941
Psudo_participant_ID_22	Psudo_sample_ID_293	Psudo_sample_ID_294	Psudo_sample_ID_295
Psudo_participant_ID_194	Psudo_sample_ID_2971	Psudo_sample_ID_2972	Psudo_sample_ID_2970
Psudo_participant_ID_200	Psudo_sample_ID_3069	Psudo_sample_ID_3070	Psudo_sample_ID_3068
Psudo_participant_ID_202	Psudo_sample_ID_3105	Psudo_sample_ID_3106	Psudo_sample_ID_3102
Psudo_participant_ID_213	Psudo_sample_ID_3327	Psudo_sample_ID_3326	Psudo_sample_ID_3329
Psudo_participant_ID_53	Psudo_sample_ID_783	Psudo_sample_ID_784	Psudo_sample_ID_785
