# Supplementary material for: The influence of maternal factors on the neonatal microbiome and health
Source: Research Square preprint supplement (doi:10.21203/rs.3.rs-2485214/v1), 2023-02-02
Supplement: Supplementary file 8 [file f067270fe44673800ccd3054.xlsx]

## Sheet: Annotation
Title	Relative abundance changes of taxa in the neonatal microbiomes within three days postpartum.
Sheet 1	Relative abundance change of bacterial taxa in the NB microbiome (day 1 vs. day 0).
Sheet 2	Relative abundance change of bacterial taxa in the NB microbiome (day 2 vs. day 1).
Sheet 3	Relative abundance change of bacterial taxa in the NR microbiome (day 1 vs. day 0).
Sheet 4	Relative abundance change of bacterial taxa in the NR microbiome (day 2 vs. day 1).
Sheet 5	Relative abundance change of bacterial taxa in the NS microbiome (day 2 vs. day 1).
Term	Annotation
wi.ep	Expected P value of the Wilcoxon rank test
wi.eBH	Expected Benjamini-Hochberg corrected P value of the Wilcoxon rank test
diff.btw	Median difference in clr values between group 'Yes' and group 'No'. Group 'No' is the control in all comparisons.
NB	The neonatal buccal microbiome
NR	The neonatal rectal microbiome
NS	The neonatal stool microbiome

## Sheet: Sheet 1
Taxa	diff.btw	wi.eBH	Comparison
Corynebacterium_OTU_226	4.11258	0.000648234	NB Day 1 vs. 0
Streptococcus_sp._HMT_423	3.72976	0.000689298	NB Day 1 vs. 0
Corynebacterium_OTU_226_BT	3.33053	0.0017564	NB Day 1 vs. 0
Streptococcus_mitis	4.9035	0.00225217	NB Day 1 vs. 0
Streptococcus_pneumoniae	3.48963	0.0024973	NB Day 1 vs. 0
Peptoniphilaceae_G-3_bacterium_HMT_929	-2.8039	0.0416786	NB Day 1 vs. 0
Mycobacterium_vaccae_BT	-2.07983	0.0592741	NB Day 1 vs. 0
Streptococcus_OTU_205_BT	1.75436	0.0821164	NB Day 1 vs. 0
Streptococcus_parasanguinis	2.6245	0.0829438	NB Day 1 vs. 0
Streptococcus_OTU_252_BT	1.88232	0.0890257	NB Day 1 vs. 0
Gemella_haemolysans	2.55354	0.0942885	NB Day 1 vs. 0
Streptococcus_mitis_BT	1.50264	0.10094	NB Day 1 vs. 0
Frigoribacterium_OTU_16	2.44954	0.110008	NB Day 1 vs. 0
Bacteroides_OTU_1173_BT	-1.79526	0.121081	NB Day 1 vs. 0
Streptococcus_infantis	1.79869	0.128968	NB Day 1 vs. 0
Bacteroides_OTU_223	-2.15984	0.130819	NB Day 1 vs. 0
Dialister_OTU_87	-1.719	0.141925	NB Day 1 vs. 0
Finegoldia_magna	-1.63796	0.144312	NB Day 1 vs. 0
Streptococcus_OTU_252	1.56633	0.152566	NB Day 1 vs. 0
Prevotella_OTU_847	-1.28485	0.218382	NB Day 1 vs. 0
Escherichia_coli	-1.70787	0.225341	NB Day 1 vs. 0
Lactobacillus_iners	-1.57934	0.226612	NB Day 1 vs. 0
Rothia_dentocariosa	1.86546	0.240052	NB Day 1 vs. 0
Dialister_OTU_4	-1.49192	0.244391	NB Day 1 vs. 0
Prevotella_buccalis	-1.42405	0.250307	NB Day 1 vs. 0
Prevotella_OTU_608	-1.39222	0.254111	NB Day 1 vs. 0
Prevotella_OTU_842	-1.40295	0.277388	NB Day 1 vs. 0
Streptococcus_OTU_548_BT	1.0856	0.28103	NB Day 1 vs. 0
Peptoniphilus_lacrimalis	-1.21709	0.341289	NB Day 1 vs. 0
Streptophyta_OTU_179_BT	1.03553	0.361027	NB Day 1 vs. 0
Microlunatus_OTU_9	-1.19456	0.364935	NB Day 1 vs. 0
Peptoniphilus_OTU_11	-1.04988	0.386839	NB Day 1 vs. 0
Prevotella_OTU_411	-1.08605	0.390104	NB Day 1 vs. 0
Anaerococcus_OTU_140	1.28607	0.391001	NB Day 1 vs. 0
Methylobacteriaceae_OTU_39	-1.07372	0.39305	NB Day 1 vs. 0
Xenococcaceae_OTU_96	-0.863753	0.399948	NB Day 1 vs. 0
Friedmanniella_OTU_41_BT	-1.02358	0.416685	NB Day 1 vs. 0
Fusobacterium_nucleatum_subsp._animalis	-0.784867	0.437673	NB Day 1 vs. 0
Streptococcus_OTU_148_BT	0.884499	0.447867	NB Day 1 vs. 0
Corynebacterium_tuberculostearicum	-0.976849	0.465422	NB Day 1 vs. 0
Lactobacillus_crispatus	-0.886357	0.482602	NB Day 1 vs. 0
Prevotella_oris	-0.675268	0.500447	NB Day 1 vs. 0
Propionibacterium_acnes	-0.837586	0.502824	NB Day 1 vs. 0
Actinomyces_odontolyticus	-0.707354	0.509848	NB Day 1 vs. 0
Streptophyta_OTU_179	1.41406	0.51134	NB Day 1 vs. 0
Haemophilus_haemolyticus	1.03353	0.512663	NB Day 1 vs. 0
Haemophilus_OTU_58	0.699097	0.529749	NB Day 1 vs. 0
Streptococcus_gordonii	-0.668028	0.532406	NB Day 1 vs. 0
Streptococcus_salivarius	0.528205	0.544877	NB Day 1 vs. 0
Streptococcus_oralis_subsp._dentisani	0.856696	0.547423	NB Day 1 vs. 0
Afipia_broomeae	0.589461	0.549062	NB Day 1 vs. 0
Streptococcus_OTU_548	0.591595	0.563966	NB Day 1 vs. 0
Alicyclobacillus_OTU_43	-0.781293	0.564565	NB Day 1 vs. 0
Acidovorax_delafieldii	0.616036	0.572283	NB Day 1 vs. 0
Prevotella_bivia	-0.687513	0.600479	NB Day 1 vs. 0
Myxococcales_OTU_355	-0.542689	0.619093	NB Day 1 vs. 0
Gemella_morbillorum	-0.457254	0.635655	NB Day 1 vs. 0
Haemophilus_parainfluenzae	0.36962	0.637991	NB Day 1 vs. 0
Lautropia_mirabilis	-0.468825	0.651152	NB Day 1 vs. 0
Streptococcus_OTU_5_BT	0.447403	0.655724	NB Day 1 vs. 0
Porphyromonas_pasteri	-0.486649	0.672177	NB Day 1 vs. 0
Streptococcus_sp._HMT_074	0.121831	0.674494	NB Day 1 vs. 0
Actinomycetales_OTU_192_BT	-0.1616	0.677559	NB Day 1 vs. 0
BVAB1	0.228938	0.682894	NB Day 1 vs. 0
Staphylococcus_aureus	-0.285159	0.68674	NB Day 1 vs. 0
Streptococcus_oralis_subsp._oralis	0.141822	0.692828	NB Day 1 vs. 0
Klebsiella_pneumoniae	-0.0561234	0.695137	NB Day 1 vs. 0
Atopobium_vaginae	0.282443	0.695298	NB Day 1 vs. 0
Abiotrophia_defectiva	0.00431189	0.695699	NB Day 1 vs. 0
Anaerovorax_OTU_46_BT	-0.0599363	0.702336	NB Day 1 vs. 0
Acidovorax_temperans	0.0878807	0.706831	NB Day 1 vs. 0
Neisseria_flava	0.119761	0.720475	NB Day 1 vs. 0
Streptococcus_cristatus	0.24441	0.724918	NB Day 1 vs. 0
Granulicatella_elegans	-0.101795	0.737311	NB Day 1 vs. 0
Streptococcus_sp._HMT_064	-0.0239693	0.741216	NB Day 1 vs. 0
Streptococcus_OTU_5	-0.0178916	0.744354	NB Day 1 vs. 0
Staphylococcus_hominis	-0.0737944	0.756865	NB Day 1 vs. 0
Porphyromonas_OTU_94_BT	0.00845554	0.803161	NB Day 1 vs. 0
Gardnerella_vaginalis	0.000813396	0.832187	NB Day 1 vs. 0

## Sheet: Sheet 2
Taxa	diff.btw	wi.eBH	Comparison
Streptophyta_OTU_179	1.12207	0.903123	NB Day 2 vs. 1
Propionibacterium_acnes	0.990613	0.89071	NB Day 2 vs. 1
Peptoniphilaceae_G-3_bacterium_HMT_929	0.931225	0.852122	NB Day 2 vs. 1
Prevotella_OTU_847	0.793903	0.889058	NB Day 2 vs. 1
Prevotella_OTU_411	0.78368	0.881661	NB Day 2 vs. 1
Streptococcus_oralis_subsp._dentisani	0.775903	0.917173	NB Day 2 vs. 1
Mycobacterium_vaccae_BT	0.718453	0.880133	NB Day 2 vs. 1
Bacteroides_OTU_1173_BT	0.696542	0.866661	NB Day 2 vs. 1
Escherichia_coli	0.659903	0.92827	NB Day 2 vs. 1
Corynebacterium_OTU_226	0.572948	0.9248	NB Day 2 vs. 1
Streptococcus_OTU_5_BT	0.503564	0.924269	NB Day 2 vs. 1
Dialister_OTU_87	0.479186	0.912926	NB Day 2 vs. 1
Dialister_OTU_4	0.443489	0.897224	NB Day 2 vs. 1
Prevotella_buccalis	0.40316	0.913089	NB Day 2 vs. 1
Staphylococcus_hominis	0.403117	0.924908	NB Day 2 vs. 1
Lactobacillus_iners	0.385145	0.92752	NB Day 2 vs. 1
Streptococcus_OTU_5	0.317156	0.920222	NB Day 2 vs. 1
Staphylococcus_aureus	0.313161	0.911371	NB Day 2 vs. 1
Rothia_dentocariosa	0.302276	0.951513	NB Day 2 vs. 1
Streptococcus_sp._HMT_074	0.300251	0.928136	NB Day 2 vs. 1
Haemophilus_haemolyticus	0.29352	0.934635	NB Day 2 vs. 1
Fusobacterium_nucleatum_subsp._animalis	0.27335	0.9209	NB Day 2 vs. 1
Prevotella_OTU_608	0.232299	0.925845	NB Day 2 vs. 1
Prevotella_OTU_842	0.215519	0.929522	NB Day 2 vs. 1
Neisseria_flava	0.161002	0.934691	NB Day 2 vs. 1
Streptophyta_OTU_179_BT	0.160324	0.945942	NB Day 2 vs. 1
Lactobacillus_crispatus	0.154894	0.928481	NB Day 2 vs. 1
Corynebacterium_OTU_226_BT	0.154463	0.950246	NB Day 2 vs. 1
Haemophilus_parainfluenzae	0.129065	0.92786	NB Day 2 vs. 1
Corynebacterium_tuberculostearicum	0.127235	0.930108	NB Day 2 vs. 1
Streptococcus_OTU_252_BT	0.11633	0.946079	NB Day 2 vs. 1
Gemella_haemolysans	0.111384	0.963644	NB Day 2 vs. 1
Streptococcus_salivarius	0.0738418	0.932688	NB Day 2 vs. 1
Prevotella_oris	0.0715631	0.922622	NB Day 2 vs. 1
Haemophilus_OTU_58	0.066673	0.932072	NB Day 2 vs. 1
Peptoniphilus_OTU_11	0.0610039	0.933259	NB Day 2 vs. 1
Klebsiella_pneumoniae	0.0608458	0.930926	NB Day 2 vs. 1
Alicyclobacillus_OTU_43	0.0509677	0.924016	NB Day 2 vs. 1
Myxococcales_OTU_355	0.0427314	0.928722	NB Day 2 vs. 1
Bacteroides_OTU_223	0.0257884	0.925933	NB Day 2 vs. 1
Streptococcus_oralis_subsp._oralis	0.0214341	0.927319	NB Day 2 vs. 1
Friedmanniella_OTU_41_BT	0.0123193	0.943133	NB Day 2 vs. 1
Streptococcus_sp._HMT_064	-0.0315748	0.932601	NB Day 2 vs. 1
Streptococcus_parasanguinis	-0.0379605	0.951744	NB Day 2 vs. 1
Methylobacteriaceae_OTU_39	-0.048731	0.92381	NB Day 2 vs. 1
Streptococcus_OTU_252	-0.0717236	0.949658	NB Day 2 vs. 1
Peptoniphilus_lacrimalis	-0.0776928	0.907837	NB Day 2 vs. 1
Streptococcus_OTU_148_BT	-0.091584	0.938688	NB Day 2 vs. 1
Microlunatus_OTU_9	-0.0990072	0.919115	NB Day 2 vs. 1
Actinomycetales_OTU_192_BT	-0.133812	0.924181	NB Day 2 vs. 1
Acidovorax_temperans	-0.15656	0.926757	NB Day 2 vs. 1
Finegoldia_magna	-0.16563	0.932873	NB Day 2 vs. 1
Afipia_broomeae	-0.168738	0.936365	NB Day 2 vs. 1
Porphyromonas_pasteri	-0.188396	0.917333	NB Day 2 vs. 1
Anaerovorax_OTU_46_BT	-0.197999	0.916104	NB Day 2 vs. 1
BVAB1	-0.25125	0.93215	NB Day 2 vs. 1
Streptococcus_OTU_548	-0.27361	0.934675	NB Day 2 vs. 1
Anaerococcus_OTU_140	-0.355098	0.937607	NB Day 2 vs. 1
Prevotella_bivia	-0.364075	0.911098	NB Day 2 vs. 1
Streptococcus_mitis_BT	-0.382267	0.907471	NB Day 2 vs. 1
Gemella_morbillorum	-0.382909	0.900603	NB Day 2 vs. 1
Lautropia_mirabilis	-0.393049	0.897846	NB Day 2 vs. 1
Streptococcus_cristatus	-0.394895	0.923303	NB Day 2 vs. 1
Actinomyces_odontolyticus	-0.4205	0.911309	NB Day 2 vs. 1
Streptococcus_gordonii	-0.481895	0.896465	NB Day 2 vs. 1
Abiotrophia_defectiva	-0.507312	0.902059	NB Day 2 vs. 1
Streptococcus_OTU_548_BT	-0.529281	0.912053	NB Day 2 vs. 1
Atopobium_vaginae	-0.555484	0.909434	NB Day 2 vs. 1
Acidovorax_delafieldii	-0.564864	0.901182	NB Day 2 vs. 1
Gardnerella_vaginalis	-0.565469	0.903541	NB Day 2 vs. 1
Granulicatella_elegans	-0.58027	0.876227	NB Day 2 vs. 1
Xenococcaceae_OTU_96	-0.62835	0.871349	NB Day 2 vs. 1
Porphyromonas_OTU_94_BT	-0.652812	0.90926	NB Day 2 vs. 1
Streptococcus_infantis	-0.744464	0.903951	NB Day 2 vs. 1
Frigoribacterium_OTU_16	-0.815585	0.927681	NB Day 2 vs. 1
Streptococcus_OTU_205_BT	-0.891459	0.878263	NB Day 2 vs. 1
Streptococcus_sp._HMT_423	-0.961268	0.897005	NB Day 2 vs. 1
Streptococcus_pneumoniae	-1.0566	0.898738	NB Day 2 vs. 1
Streptococcus_mitis	-1.11627	0.882718	NB Day 2 vs. 1

## Sheet: Sheet 3
Taxa	diff.btw	wi.eBH	Comparison
Escherichia_coli	6.07555	0.0294547	NR Day 1 vs. 0
Enterobacteriaceae_OTU_653_BT	3.6127	0.0367329	NR Day 1 vs. 0
Solirubrobacterales_OTU_66	4.03342	0.037967	NR Day 1 vs. 0
Escherichia_coli_BT	2.86941	0.0455079	NR Day 1 vs. 0
Enterobacter_cowanii_BT	2.91773	0.0834844	NR Day 1 vs. 0
Enterococcus_faecalis	2.8132	0.105712	NR Day 1 vs. 0
Streptococcus_mitis	-2.74385	0.112733	NR Day 1 vs. 0
Enterobacter_cowanii	2.00198	0.160199	NR Day 1 vs. 0
Enterobacteriaceae_OTU_653	2.02747	0.171396	NR Day 1 vs. 0
Lactobacillus_iners	-2.20757	0.185082	NR Day 1 vs. 0
Atopobium_vaginae	-2.04225	0.195025	NR Day 1 vs. 0
Corynebacterium_OTU_226_BT	-2.2197	0.201499	NR Day 1 vs. 0
Enterobacteriaceae_OTU_490	1.9068	0.204095	NR Day 1 vs. 0
Propionibacterium_acnes	-2.33253	0.204661	NR Day 1 vs. 0
Fibrobacteria_258ds10_OTU_4_BT	1.99265	0.208435	NR Day 1 vs. 0
Enterobacter_hormaechei	2.08096	0.2109	NR Day 1 vs. 0
Prevotella_OTU_515	-2.04915	0.220795	NR Day 1 vs. 0
Megasphaera_sp._HMT_841	-1.88376	0.232093	NR Day 1 vs. 0
Gemella_haemolysans	-1.87268	0.244251	NR Day 1 vs. 0
Corynebacterium_OTU_226	-2.42438	0.252895	NR Day 1 vs. 0
Enterobacter_hormaechei_BT	1.86032	0.27048	NR Day 1 vs. 0
Streptococcus_pneumoniae	-1.67459	0.294759	NR Day 1 vs. 0
Gardnerella_vaginalis	-1.79328	0.298767	NR Day 1 vs. 0
Prevotella_OTU_806	-1.55518	0.305482	NR Day 1 vs. 0
Sneathia_amnii	-1.42744	0.352662	NR Day 1 vs. 0
Enterobacteriaceae_OTU_11_BT	1.40029	0.353293	NR Day 1 vs. 0
Enterobacteriaceae_OTU_274	1.20696	0.354268	NR Day 1 vs. 0
Corynebacterium_amycolatum	1.20525	0.411187	NR Day 1 vs. 0
Streptococcus_parasanguinis	-1.49116	0.418802	NR Day 1 vs. 0
Frigoribacterium_OTU_16	-1.18883	0.429981	NR Day 1 vs. 0
Bacteroides_OTU_1018	0.921653	0.434438	NR Day 1 vs. 0
Lachnospiraceae_OTU_3692	0.972502	0.434522	NR Day 1 vs. 0
Peptoniphilaceae_G-3_bacterium_HMT_929	-0.958628	0.436519	NR Day 1 vs. 0
Dialister_micraerophilus	-1.02894	0.439604	NR Day 1 vs. 0
Coriobacteriaceae_OTU_206	-1.12437	0.453166	NR Day 1 vs. 0
Porphyromonas_OTU_94_BT	1.36331	0.463684	NR Day 1 vs. 0
Prevotella_OTU_847	-0.887865	0.471839	NR Day 1 vs. 0
Sneathia_sanguinegens	-1.13029	0.477543	NR Day 1 vs. 0
Streptococcus_OTU_5_BT	-0.968399	0.485373	NR Day 1 vs. 0
Bacteroides_OTU_600	0.888154	0.488215	NR Day 1 vs. 0
Bacteroides_OTU_1115	0.905626	0.49007	NR Day 1 vs. 0
Enterobacteriaceae_OTU_11	1.13016	0.516814	NR Day 1 vs. 0
BVAB1	-0.986701	0.517324	NR Day 1 vs. 0
Bacteroides_OTU_223	1.09765	0.518725	NR Day 1 vs. 0
Afipia_broomeae	-0.783161	0.543299	NR Day 1 vs. 0
Lactobacillus_jensenii	-0.63225	0.556917	NR Day 1 vs. 0
Bacteroides_OTU_1173_BT	-0.551594	0.565428	NR Day 1 vs. 0
Lachnospiraceae_OTU_3692_BT	0.544149	0.582615	NR Day 1 vs. 0
Streptophyta_OTU_179	-0.945714	0.589414	NR Day 1 vs. 0
Leptotrichia_OTU_46	0.350038	0.606976	NR Day 1 vs. 0
Lactobacillus_crispatus	-0.797027	0.616602	NR Day 1 vs. 0
Klebsiella_pneumoniae	-0.30141	0.638719	NR Day 1 vs. 0
Staphylococcus_hominis	0.580891	0.641963	NR Day 1 vs. 0
Bacteroides_OTU_189	0.51466	0.656734	NR Day 1 vs. 0
Bacteroides_OTU_606	0.382598	0.663453	NR Day 1 vs. 0
Actinoplanes_OTU_8	0.180171	0.66743	NR Day 1 vs. 0
Microlunatus_OTU_9	0.178687	0.669413	NR Day 1 vs. 0
Prevotella_bivia	-0.384069	0.677155	NR Day 1 vs. 0
Bacteroides_fragilis	-0.228536	0.681021	NR Day 1 vs. 0
Gaiellaceae_OTU_233	0.245574	0.682513	NR Day 1 vs. 0
Corynebacterium_tuberculostearicum	0.54954	0.68287	NR Day 1 vs. 0
Cardiobacterium_OTU_5_BT	0.130507	0.687356	NR Day 1 vs. 0
Rothia_dentocariosa	-0.63373	0.688585	NR Day 1 vs. 0
Mycobacterium_vaccae_BT	-0.304821	0.689989	NR Day 1 vs. 0
Anaerovorax_OTU_46_BT	-0.14828	0.692584	NR Day 1 vs. 0
Enterobacteriaceae_OTU_561_BT	0.300106	0.694645	NR Day 1 vs. 0
Bacteroides_OTU_975	0.228289	0.694833	NR Day 1 vs. 0
Bacteroides_OTU_207	-0.150341	0.695298	NR Day 1 vs. 0
Christensenellaceae_OTU_260	0.350307	0.695854	NR Day 1 vs. 0
Prevotella_OTU_411	-0.371417	0.696244	NR Day 1 vs. 0
Alicyclobacillus_OTU_43	0.150066	0.696274	NR Day 1 vs. 0
Corynebacterium_accolens	0.0418726	0.696951	NR Day 1 vs. 0
Xenococcaceae_OTU_96	0.342718	0.704188	NR Day 1 vs. 0
Enterobacteriaceae_OTU_222	0.00732377	0.741286	NR Day 1 vs. 0
Staphylococcus_aureus	0.0984617	0.758441	NR Day 1 vs. 0
Friedmanniella_OTU_41_BT	-0.228792	0.760956	NR Day 1 vs. 0

## Sheet: Sheet 4
Taxa	diff.btw	wi.eBH	Comparison
Corynebacterium_tuberculostearicum	3.09707	0.719946	NR Day 2 vs. 1
Staphylococcus_aureus	2.23572	0.744365	NR Day 2 vs. 1
Porphyromonas_OTU_94_BT	3.30893	0.750191	NR Day 2 vs. 1
Klebsiella_pneumoniae	0.986159	0.802898	NR Day 2 vs. 1
Propionibacterium_acnes	-1.01742	0.821481	NR Day 2 vs. 1
Enterobacter_cowanii	-1.38735	0.834514	NR Day 2 vs. 1
Corynebacterium_accolens	1.082	0.843813	NR Day 2 vs. 1
Enterococcus_faecalis	2.04487	0.852795	NR Day 2 vs. 1
Gardnerella_vaginalis	0.878894	0.854807	NR Day 2 vs. 1
Atopobium_vaginae	1.0073	0.8581	NR Day 2 vs. 1
Solirubrobacterales_OTU_66	-1.37694	0.861515	NR Day 2 vs. 1
Mycobacterium_vaccae_BT	-0.74469	0.863812	NR Day 2 vs. 1
Enterobacter_cowanii_BT	-1.32601	0.864245	NR Day 2 vs. 1
Enterobacteriaceae_OTU_561_BT	0.771709	0.870737	NR Day 2 vs. 1
Corynebacterium_OTU_226	-0.978185	0.875972	NR Day 2 vs. 1
Prevotella_OTU_806	-0.610101	0.876664	NR Day 2 vs. 1
Peptoniphilaceae_G-3_bacterium_HMT_929	0.494276	0.877436	NR Day 2 vs. 1
Fibrobacteria_258ds10_OTU_4_BT	-1.03797	0.879546	NR Day 2 vs. 1
Anaerovorax_OTU_46_BT	-0.384718	0.887274	NR Day 2 vs. 1
Bacteroides_OTU_1018	-0.611849	0.888369	NR Day 2 vs. 1
Escherichia_coli	-1.09181	0.888798	NR Day 2 vs. 1
Bacteroides_OTU_1115	-0.289749	0.888984	NR Day 2 vs. 1
Frigoribacterium_OTU_16	-0.55734	0.889854	NR Day 2 vs. 1
Gemella_haemolysans	-0.680355	0.890445	NR Day 2 vs. 1
Rothia_dentocariosa	-0.56091	0.89315	NR Day 2 vs. 1
Microlunatus_OTU_9	-0.475787	0.893163	NR Day 2 vs. 1
Prevotella_OTU_515	-0.335202	0.893244	NR Day 2 vs. 1
Bacteroides_OTU_207	0.490741	0.895325	NR Day 2 vs. 1
Gaiellaceae_OTU_233	-0.613778	0.897762	NR Day 2 vs. 1
Megasphaera_sp._HMT_841	0.333549	0.897986	NR Day 2 vs. 1
Bacteroides_OTU_600	-0.694314	0.901151	NR Day 2 vs. 1
Afipia_broomeae	-0.330714	0.902568	NR Day 2 vs. 1
Christensenellaceae_OTU_260	-0.589079	0.905109	NR Day 2 vs. 1
Dialister_micraerophilus	-0.351835	0.906667	NR Day 2 vs. 1
Lactobacillus_jensenii	0.602001	0.906673	NR Day 2 vs. 1
Staphylococcus_hominis	0.62306	0.907798	NR Day 2 vs. 1
Bacteroides_OTU_975	-0.285653	0.908077	NR Day 2 vs. 1
Alicyclobacillus_OTU_43	-0.119675	0.90928	NR Day 2 vs. 1
Bacteroides_OTU_606	-0.135226	0.909385	NR Day 2 vs. 1
Sneathia_sanguinegens	-0.151392	0.910346	NR Day 2 vs. 1
Enterobacteriaceae_OTU_222	-0.427551	0.910698	NR Day 2 vs. 1
Lachnospiraceae_OTU_3692_BT	-0.470544	0.910908	NR Day 2 vs. 1
Leptotrichia_OTU_46	-0.138212	0.91218	NR Day 2 vs. 1
Streptophyta_OTU_179	-0.620976	0.914822	NR Day 2 vs. 1
Streptococcus_OTU_5_BT	-0.0443228	0.915728	NR Day 2 vs. 1
Bacteroides_OTU_1173_BT	-0.368017	0.919736	NR Day 2 vs. 1
Lachnospiraceae_OTU_3692	-0.227537	0.919888	NR Day 2 vs. 1
Prevotella_OTU_847	-0.102168	0.920052	NR Day 2 vs. 1
Bacteroides_fragilis	0.213945	0.921509	NR Day 2 vs. 1
Sneathia_amnii	-0.0871957	0.922692	NR Day 2 vs. 1
Bacteroides_OTU_223	-0.599269	0.922859	NR Day 2 vs. 1
Actinoplanes_OTU_8	-0.22848	0.923164	NR Day 2 vs. 1
Xenococcaceae_OTU_96	-0.0437875	0.924851	NR Day 2 vs. 1
Prevotella_OTU_411	-0.117388	0.925448	NR Day 2 vs. 1
BVAB1	0.255517	0.926489	NR Day 2 vs. 1
Enterobacteriaceae_OTU_274	-0.241331	0.927085	NR Day 2 vs. 1
Prevotella_bivia	0.119316	0.927183	NR Day 2 vs. 1
Enterobacteriaceae_OTU_490	-0.224962	0.927269	NR Day 2 vs. 1
Coriobacteriaceae_OTU_206	-0.33805	0.927931	NR Day 2 vs. 1
Streptococcus_parasanguinis	-0.124251	0.928333	NR Day 2 vs. 1
Cardiobacterium_OTU_5_BT	0.0685792	0.928558	NR Day 2 vs. 1
Bacteroides_OTU_189	0.142803	0.930331	NR Day 2 vs. 1
Corynebacterium_OTU_226_BT	0.289694	0.930444	NR Day 2 vs. 1
Enterobacteriaceae_OTU_653	-0.375559	0.931159	NR Day 2 vs. 1
Streptococcus_pneumoniae	0.32884	0.932901	NR Day 2 vs. 1
Corynebacterium_amycolatum	-0.0171422	0.933641	NR Day 2 vs. 1
Escherichia_coli_BT	-0.539337	0.936468	NR Day 2 vs. 1
Enterobacteriaceae_OTU_11_BT	0.235182	0.93718	NR Day 2 vs. 1
Enterobacter_hormaechei	-0.507772	0.938016	NR Day 2 vs. 1
Friedmanniella_OTU_41_BT	0.215856	0.938833	NR Day 2 vs. 1
Lactobacillus_crispatus	0.302456	0.939248	NR Day 2 vs. 1
Enterobacteriaceae_OTU_11	0.0770596	0.942355	NR Day 2 vs. 1
Lactobacillus_iners	0.512129	0.943104	NR Day 2 vs. 1
Enterobacteriaceae_OTU_653_BT	-0.629824	0.944211	NR Day 2 vs. 1
Enterobacter_hormaechei_BT	-0.0802967	0.946087	NR Day 2 vs. 1
Streptococcus_mitis	0.177669	0.948457	NR Day 2 vs. 1

## Sheet: Sheet 5
Taxa	diff.btw	wi.eBH	Comparison
Enterobacter_cowanii	2.28077	0.654487	NS Day 2 vs. 1
Propionibacterium_acnes	-1.70251	0.662154	NS Day 2 vs. 1
Klebsiella_OTU_100	1.45533	0.698225	NS Day 2 vs. 1
Enterobacter_cowanii_BT	1.88913	0.70711	NS Day 2 vs. 1
Gardnerella_vaginalis	-1.39379	0.715897	NS Day 2 vs. 1
Escherichia_coli_BT	1.84009	0.721393	NS Day 2 vs. 1
WAL_1855D_OTU_2_BT	1.55782	0.74934	NS Day 2 vs. 1
Klebsiella_oxytoca	1.41331	0.763856	NS Day 2 vs. 1
Acidovorax_delafieldii	-0.965443	0.775847	NS Day 2 vs. 1
Alicyclobacillus_OTU_43	-1.33379	0.776913	NS Day 2 vs. 1
Enterobacter_hormaechei	1.95394	0.779487	NS Day 2 vs. 1
Streptococcus_mitis	-1.0977	0.78256	NS Day 2 vs. 1
BVAB1	-1.02515	0.785034	NS Day 2 vs. 1
Lactobacillus_iners	-1.05005	0.789735	NS Day 2 vs. 1
Serratia_marcescens_BT	1.16199	0.79693	NS Day 2 vs. 1
Klebsiella_pneumoniae	1.65525	0.80163	NS Day 2 vs. 1
Solirubrobacterales_OTU_66	1.31938	0.803603	NS Day 2 vs. 1
Hyphomicrobium_OTU_169	0.85516	0.818639	NS Day 2 vs. 1
Enterobacter_hormaechei_BT	1.47118	0.821536	NS Day 2 vs. 1
Prevotella_OTU_411	-0.915323	0.823286	NS Day 2 vs. 1
Bacteroides_OTU_223_BT	-0.621473	0.834373	NS Day 2 vs. 1
Bacteroides_OTU_532	0.563028	0.835779	NS Day 2 vs. 1
Parabacteroides_OTU_90	-0.775215	0.838313	NS Day 2 vs. 1
Enterobacteriaceae_OTU_11	-1.24889	0.840421	NS Day 2 vs. 1
Parabacteroides_distasonis	-0.581074	0.846561	NS Day 2 vs. 1
Bacteroides_OTU_189_BT	-0.544458	0.851425	NS Day 2 vs. 1
Staphylococcus_OTU_45_BT	-0.257767	0.856856	NS Day 2 vs. 1
Bacteroides_OTU_189	-0.815542	0.858606	NS Day 2 vs. 1
Bacteroides_OTU_479	-0.920646	0.860437	NS Day 2 vs. 1
Bacteroides_OTU_476	-0.642912	0.86114	NS Day 2 vs. 1
Bacteroides_OTU_223	-0.863084	0.863112	NS Day 2 vs. 1
Porphyromonas_OTU_94_BT	-1.29794	0.86397	NS Day 2 vs. 1
Bacteroides_OTU_338	-0.616523	0.864876	NS Day 2 vs. 1
Lactobacillus_crispatus	-0.729173	0.868817	NS Day 2 vs. 1
Fibrobacteria_258ds10_OTU_4_BT	0.91107	0.870702	NS Day 2 vs. 1
Bacteroides_OTU_1018	-0.594371	0.874826	NS Day 2 vs. 1
Bacteroides_OTU_205	0.369492	0.875876	NS Day 2 vs. 1
Megasphaera_sp._HMT_841	-0.294385	0.877208	NS Day 2 vs. 1
Enterobacteriaceae_OTU_653	0.79455	0.877442	NS Day 2 vs. 1
Actinoplanes_OTU_8_BT	-0.333484	0.879032	NS Day 2 vs. 1
Bacteroides_OTU_662	-0.607759	0.880666	NS Day 2 vs. 1
Christensenellaceae_OTU_260	-0.362598	0.881552	NS Day 2 vs. 1
Staphylococcus_aureus	-0.536627	0.883055	NS Day 2 vs. 1
Klebsiella_aerogenes	0.741572	0.884486	NS Day 2 vs. 1
Enterobacteriaceae_OTU_653_BT	0.908749	0.886704	NS Day 2 vs. 1
Actinoplanes_OTU_8	0.475741	0.888309	NS Day 2 vs. 1
Bacteroides_OTU_606	-0.180109	0.890409	NS Day 2 vs. 1
Bacteroides_OTU_1320	-0.0350264	0.891426	NS Day 2 vs. 1
S24-7_OTU_1436	-0.0259413	0.891582	NS Day 2 vs. 1
Enterobacteriaceae_OTU_262_BT	-0.135821	0.892206	NS Day 2 vs. 1
Bacteroides_OTU_785	-0.442653	0.892234	NS Day 2 vs. 1
Rothia_dentocariosa	-0.276198	0.893488	NS Day 2 vs. 1
Enterobacteriaceae_OTU_274	0.522385	0.893631	NS Day 2 vs. 1
Staphylococcus_hominis	-0.25471	0.893866	NS Day 2 vs. 1
Streptophyta_OTU_179	-0.581165	0.894485	NS Day 2 vs. 1
Proteus_mirabilis	-0.216846	0.895133	NS Day 2 vs. 1
Bacteroides_OTU_179	0.111385	0.8957	NS Day 2 vs. 1
Bacteroides_OTU_975	0.0762938	0.898329	NS Day 2 vs. 1
Enterobacteriaceae_OTU_490	0.522163	0.898482	NS Day 2 vs. 1
Escherichia_coli	1.16039	0.900531	NS Day 2 vs. 1
Xenococcaceae_OTU_96	-0.254812	0.901309	NS Day 2 vs. 1
Bacteroides_OTU_600	-0.0551379	0.902999	NS Day 2 vs. 1
Bacteroides_OTU_207	0.210841	0.90381	NS Day 2 vs. 1
Corynebacterium_tuberculostearicum	0.351895	0.905448	NS Day 2 vs. 1
Enterobacteriaceae_OTU_561_BT	0.061801	0.906298	NS Day 2 vs. 1
Atopobium_vaginae	-0.189088	0.906534	NS Day 2 vs. 1
Bacteroides_OTU_1115	-0.0339626	0.906943	NS Day 2 vs. 1
Microlunatus_OTU_9	0.00725146	0.90772	NS Day 2 vs. 1
Afipia_broomeae	0.113932	0.908431	NS Day 2 vs. 1
Enterobacteriaceae_OTU_222	-0.209188	0.911647	NS Day 2 vs. 1
Friedmanniella_OTU_41_BT	0.173777	0.916437	NS Day 2 vs. 1
Enterobacteriaceae_OTU_11_BT	-0.237127	0.928891	NS Day 2 vs. 1
Enterococcus_faecalis	0.639631	0.929121	NS Day 2 vs. 1
Corynebacterium_OTU_226	-0.0540793	0.944959	NS Day 2 vs. 1
